# Supplementary material for: Rhodium-catalyzed domino heterocyclization and [(3+2)+2] carbocyclization: construction of fused tricycloheptadienes
Source: Royal Society of Chemistry journal article supplement (doi:10.1039/c0cc02382e), 2010-01-01

**Rhodium-Catalyzed Domino Heterocyclization and [(3+2)+2] Cycloaddition:  
Construction of Fused Tricycloheptadienes.**

Wanxiang Zhao and Junliang Zhang\*

*Shanghai Key Laboratory of Green Chemistry and Chemical Processes, Department  
of Chemistry, East China Normal University, 3663 N. Zhongshan Road, Shanghai  
200062, People's Republic of China*

Fax:(+86)-021-6223-5039; e-mail :jlzhang@chem.ecnu.edu.cn

## General Information

All reactions were carried out in oven-dried glassware under a positive pressure of nitrogen or a mixture of gas. Reactions were monitored using thin-layer chromatography (TLC) Visualization of the developed plates was performed under UV light (254 nm) or KMnO<sub>4</sub> stain. 1,4-Dioxane and toluene were distilled from sodium and benzophenone prior to use. 1,2-Dichloroethane was distilled from CaH<sub>2</sub> prior to use. [RhCl(CO)<sub>2</sub>]<sub>2</sub> were purchased from Alfa Aesar. Purification of products was accomplished by flash chromatography on silica gel. NMR spectra were recorded on a NMR spectrometer operating at 300 MHz for <sup>1</sup>H and 75 MHz for <sup>13</sup>C. Data for <sup>13</sup>C-NMR are reported in terms of chemical shift (ppm) relative to residual solvent peak (CDCl<sub>3</sub>: 77.0 ppm).

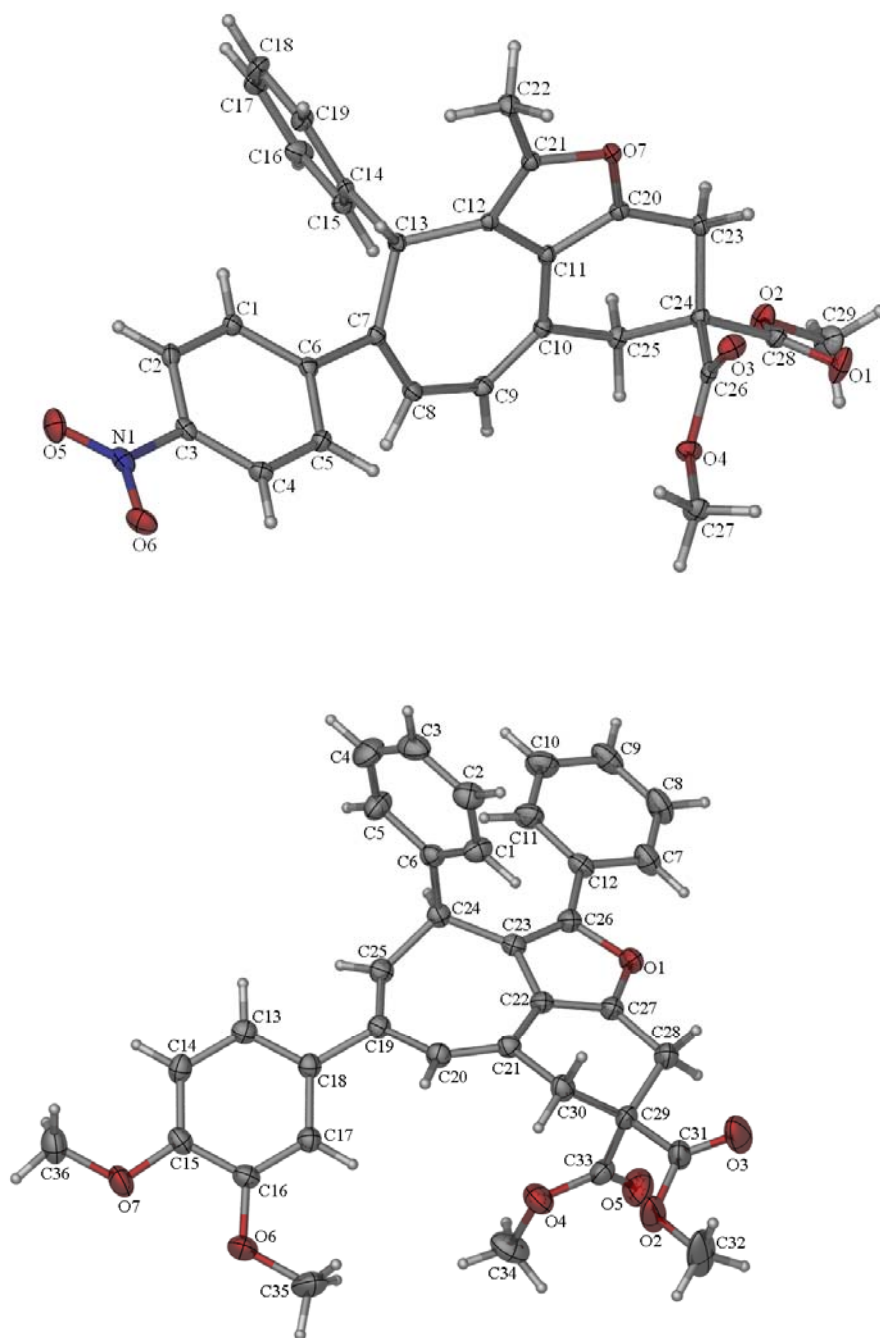

**Figure 1.** X-ray structures of compounds **3bf'** (upper) and **3ad**

**Table 1** Optimization of the rhodium-catalyzed tandem heterocyclization and [(3+2)+2] cycloaddition.

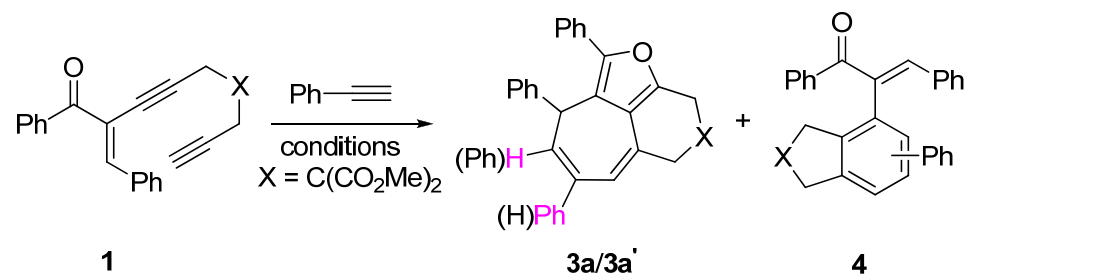

| Entry                 | Conditions <sup>a</sup>                                                             | Yield (%) <sup>b</sup>         |          |
|-----------------------|-------------------------------------------------------------------------------------|--------------------------------|----------|
|                       |                                                                                     | ( <b>3a/3a'</b> ) <sup>c</sup> | <b>4</b> |
| 1                     | [RhCl(CO) <sub>2</sub> ] <sub>2</sub> , DCE, 60 °C/2 h                              | 57 (2.0/1)                     | 38       |
| 2                     | [RhCl(CO) <sub>2</sub> ] <sub>2</sub> , dioxane, 80 °C/1 h                          | 35 (1.4/1)                     | 33       |
| 3                     | [RhCl(CO) <sub>2</sub> ] <sub>2</sub> , toluene, 80 °C/1 h                          | 34 (1.4/1)                     | 31       |
| 4                     | [RhCl(CO) <sub>2</sub> ] <sub>2</sub> , DCE, 80 °C/1 h                              | 46 (1.8/1)                     | 40       |
| 5                     | [RhCl(CO) <sub>2</sub> ] <sub>2</sub> , DCE, 40 °C/20 h                             | 53 (2.0/1)                     | 14       |
| 6                     | [RhCl(CO) <sub>2</sub> ] <sub>2</sub> , 10 mol % PPh <sub>3</sub> , DCE, 60 °C/16 h | 43 (2.0/1)                     | 21       |
| 7 <sup>[d]</sup>      | [RhCl(CO) <sub>2</sub> ] <sub>2</sub> , 10 mol % PCy <sub>3</sub> , DCE, 60 °C/18 h | 44 (2.2/1)                     | 34       |
| 8                     | RhCl(CO)(PPh <sub>3</sub> ) <sub>2</sub> , DCE, 60 °C/20 h                          | 0                              | 0        |
| 9                     | [RhCl(CO) <sub>2</sub> ] <sub>2</sub> , 10 mol% AgOTf, DCE, 60 °C/2 h               | 0                              | 87       |
| 10 <sup>[e]</sup>     | [RhCl(CO) <sub>2</sub> ] <sub>2</sub> , DCE, 60 °C/2 h                              | 45 (2.2/1)                     | trace    |
| 11 <sup>[f]</sup>     | [RhCl(CO) <sub>2</sub> ] <sub>2</sub> , DCE, 60 °C/3 h                              | 57 (2.2/1)                     | trace    |
| 12 <sup>[f,g]</sup>   | [RhCl(CO) <sub>2</sub> ] <sub>2</sub> , DCE, 60 °C/3 h                              | 65 (2.2/1)                     | trace    |
| 13 <sup>[f,h]</sup>   | [RhCl(CO) <sub>2</sub> ] <sub>2</sub> , DCE, 60 °C/3 h                              | 70 (2.2/1)                     | trace    |
| 14 <sup>[f]</sup>     | [RhCl(COD)] <sub>2</sub> , DCE, 60 °C/3 h                                           | 70 (1.6/1)                     | trace    |
| 15 <sup>[f,g,i]</sup> | [RhCl(CO) <sub>2</sub> ] <sub>2</sub> , DCE, 60 °C/3 h                              | 61 (2.2/1)                     | trace    |
| 16 <sup>[f,h,i]</sup> | [RhCl(CO) <sub>2</sub> ] <sub>2</sub> , DCE, 60 °C/3 h                              | 70 (2.2/1)                     | trace    |

[a] Conditions (unless otherwise noted): Rhodium (5 mol %), **1a** (1.0 equiv, 0.1 M), phenylacetylene (2.0 equiv). [b] Isolated yield. [c] The ratio of **3aa/3aa'** was determined by <sup>1</sup>H NMR. [d] 28% of **1a** was recovered. [e] The reaction was run under a carbon monoxide atmosphere (balloon 1 atm). [f] The reaction was run with 0.2 atm CO + 0.8 atm N<sub>2</sub>. [g] 3.0 equiv of phenylacetylene. [h] 5.0 equiv of phenylacetylene. [i] **8a** (0.05 M) was used.

## General Procedure for the Rh-catalyzed tandem heterocyclization and [(3+2)+2] cycloaddition.

[Rh(CO)<sub>2</sub>Cl]<sub>2</sub> (5 mol % to the substrate) was charged in a base-washed, oven-dried Schlenk flask under an atmosphere of the mixed gas (0.2 atm CO + 0.8 atm N<sub>2</sub>), and then a solution of **1** (0.1 M) and **2** in degassed DCE was added. The reaction mixture was stirred at 60 °C under the mixed CO/N<sub>2</sub> atmosphere until TLC indicated the completion of the reaction. After being cooled to room temperature, the mixture was concentrated and the residue was purified by flash column chromatography with silica gel to afford the cycloaddition products.

### 1. Synthesis of fused 5,6,7-tricyclic **3aa/3aa'**:

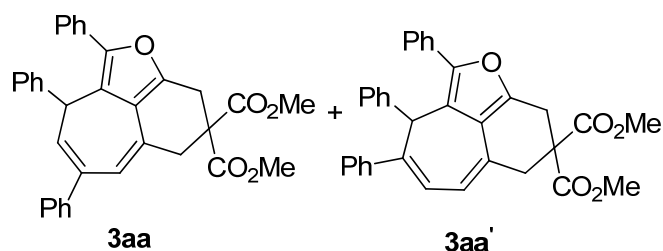

<sup>1</sup>H NMR (300 MHz, CDCl<sub>3</sub>) **3aa**: δ = 7.50 (d, *J* = 7.8 Hz, 2 H), 7.41-7.10 (m, 13 H), 6.19 (d, *J* = 8.7 Hz, 1 H), 5.96 (s, 1 H), 5.18 (d, *J* = 8.7 Hz, 1 H), 3.74 (s, 6 H), 3.59 (d, *J* = 16.2 Hz, 1 H), 3.30 (d, *J* = 16.2 Hz, 1 H), 3.12 (s, 2 H), **3aa'**: δ = 7.56 (d, *J* = 7.8 Hz, 2 H), 7.41-7.10 (m, 13 H), 6.35 (d, *J* = 7.5 Hz, 1 H), 5.83 (d, *J* = 7.5 Hz, 1 H), 5.64 (s, 1 H), 3.69 (s, 6 H), 3.59 (d, *J* = 16.2 Hz, 1 H), 3.30 (d, *J* = 16.2 Hz, 1 H), 3.04 (s, 2 H), <sup>13</sup>C NMR (75 MHz, CDCl<sub>3</sub>) (**3aa** + **3aa'**): δ = 170.75, 170.16, 148.96, 148.29, 147.82, 145.11, 145.07, 143.88, 142.75, 140.74, 138.95, 130.92, 130.82, 130.07, 129.55, 128.85, 128.69, 128.54, 128.44, 128.39, 128.17, 128.05, 127.36, 127.29, 127.07, 127.00, 126.86, 126.66, 126.28, 126.24, 126.09, 125.93, 122.89, 121.23, 120.95, 120.61, 120.51, 120.06, 56.22, 56.19, 53.04, 53.00, 52.97, 45.21, 40.93, 37.92, 37.18, 29.59, 29.48 ppm. MS (70 ev) *m/z* (%): 516 (M<sup>+</sup>, 100), HRMS calcd for C<sub>34</sub>H<sub>28</sub>O<sub>5</sub>: 516.1937, found: 516.1941.

## 2. Synthesis of fused 5,6,7-tricyclic **3ba/3ba'**:

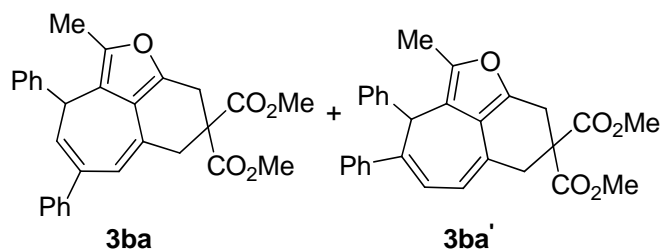

<sup>1</sup>H NMR (300 MHz, CDCl<sub>3</sub>) **3ba**: δ = 7.41-7.12(m, 10 H), 6.02 (d, *J* = 7.8 Hz, 1 H), 5.92 (s, 1 H), 4.71 (d, *J* = 7.8 Hz, 1 H), 3.71-3.68 (m, 6 H), 3.46 (s, 1 H), 3.23 (s, 1 H), 3.01(s, 2 H), 2.07 (s, 3 H), **3ba'**: δ = 7.41-7.12(m, 10 H), 6.31 (d, *J* = 7.5 Hz, 1 H), 5.80 (d, *J* = 7.5 Hz, 1 H), 5.03 (s, 1 H), 3.74 (s, 6 H), 3.40-3.38 (m, 1 H), 3.16 (d, *J* = 11.4 Hz, 1 H), 3.08 (s, 2 H), 2.30 (s, 3H), <sup>13</sup>C NMR (75 MHz, CDCl<sub>3</sub>) (**3ba + 3ba'**): δ = 170.92, 170.83, 170.42, 170.36, 147.43, 146.72, 146.41, 145.90, 145.76, 145.52, 144.84, 144.29, 140.37, 138.34, 130.11, 129.83, 129.19, 128.52, 128.41, 128.20, 128.06, 127.32, 127.15, 126.89, 126.79, 126.73, 126.65, 126.28, 121.88, 119.68, 119.50, 119.44, 119.23, 119.02, 56.29, 53.03, 52.98, 46.23, 42.08, 37.86, 37.10, 29.67, 29.49, 29.40, 11.66, 11.55. MS (70 ev) *m/z* (%): 454 (M<sup>+</sup>,100), HRMS calcd for C<sub>29</sub>H<sub>26</sub>O<sub>5</sub>: 454.1780, found: 454.1782.

## 3. Synthesis of fused 5,6,7-tricyclic **3ca/3ca'**:

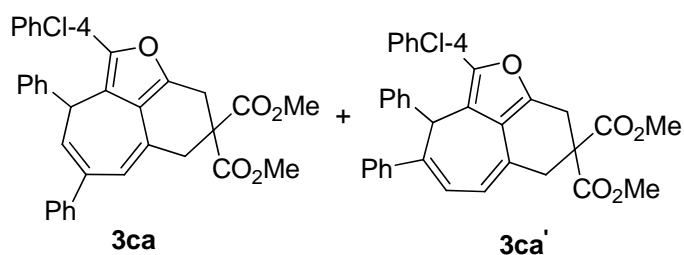

<sup>1</sup>H NMR (300 MHz, CDCl<sub>3</sub>) **3ca**: δ = 7.51-7.07 (m, 14 H), 6.17 (d, *J* = 8.7 Hz, 1 H), 5.97 (s, 1 H), 5.12 (d, *J* = 8.7 Hz, 1 H), 3.85-3.70 (m, 6 H), 3.68-3.55 (m, 1 H), 3.29 (d, *J* = 16.2 Hz, 1 H), 3.12 (s, 2 H), **3ca'**: δ = 7.51-7.07 (m, 14 H), 6.34 (d, *J* = 7.5 Hz, 1 H), 5.84 (d, *J* = 7.5 Hz, 1 H), 5.55 (s, 1 H), 3.78-3.70 (m, 6 H), 3.68-3.55 (m, 1 H), 3.24 (d, *J* = 16.2 Hz, 1 H), 3.04 (s, 2 H), <sup>13</sup>C NMR (75 MHz, CDCl<sub>3</sub>) (**3ca + 3ca'**): δ = 170.77, 170.19, 149.31, 148.63, 146.76, 145.04, 143.69, 142.56, 140.70, 138.99,

133.17, 133.10, 129.92, 129.42, 129.33, 128.99, 128.82, 128.72, 128.59, 128.49, 128.30, 128.12, 127.94, 127.30, 127.14, 127.11, 127.04, 126.99, 126.84, 126.70, 126.43, 126.26, 123.13, 121.35, 121.16, 121.07, 121.04, 120.29, 56.21, 53.15, 53.10, 45.36, 41.09, 37.96, 37.21, 29.63, 29.52 ppm. MS (70 ev)  $m/z$  (%): 550 ( $M^+$ , 14.98), 488 (100), HRMS calcd for  $C_{34}H_{27}O_5Cl$ : 550.1547, found: 550.1551.

#### 4. Synthesis of fused 5,6,7-tricyclic **3da**/**3da'**:

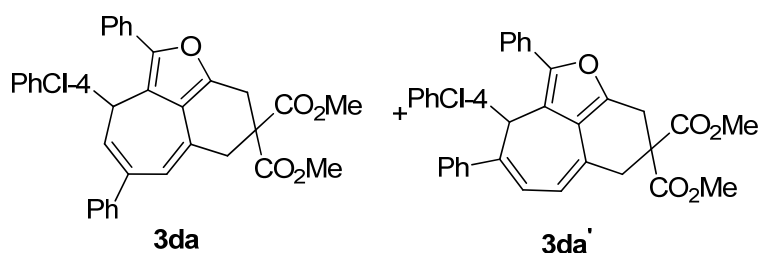

<sup>1</sup>H NMR (300 MHz, CDCl<sub>3</sub>) **3da**:  $\delta$  = 7.48 (d,  $J$  = 8.1 Hz, 2 H), 7.38-7.10 (m, 12 H), 6.15 (d,  $J$  = 8.7 Hz, 1 H), 5.96 (s, 1 H), 5.15 (d,  $J$  = 8.7 Hz, 1 H), 3.82-3.75 (m, 6 H), 3.64 (d,  $J$  = 17.1 Hz, 1 H), 3.31 (d,  $J$  = 17.1 Hz, 1 H), 3.12 (s, 2 H), **3da'**:  $\delta$  = 7.53 (d,  $J$  = 7.8 Hz, 2 H), 7.38-7.10 (m, 12 H), 6.35 (d,  $J$  = 7.5 Hz, 1 H), 5.83 (d,  $J$  = 7.5 Hz, 1 H), 5.58 (s, 1 H), 3.72-3.70 (m, 6 H), 3.62-3.55 (m, 1 H), 3.59 (d,  $J$  = 15 Hz, 1 H), 3.26 (d,  $J$  = 15 Hz, 2 H), 3.04 (s, 2 H), <sup>13</sup>C NMR (75 MHz, CDCl<sub>3</sub>) (**3da** + **3da'**):  $\delta$  = 170.71, 170.13, 149.19, 148.53, 147.91, 144.86, 142.31, 141.27, 140.32, 139.44, 132.08, 132.01, 130.73, 130.67, 130.28, 129.73, 128.78, 128.63, 128.55, 128.49, 128.36, 128.29, 128.12, 127.53, 127.48, 127.06, 127.00, 126.60, 126.42, 126.10, 125.93, 122.84, 121.07, 120.77, 120.21, 120.07, 119.98, 56.20, 53.10, 53.04, 44.68, 40.24, 37.87, 37.15, 29.59 ppm. MS (70 ev)  $m/z$  (%): 550 ( $M^+$ , 6.84), 488 (100), HRMS calcd for  $C_{34}H_{27}O_5Cl$ : 550.1547, found: 550.1544.

## 5. Synthesis of fused 5,6,7-tricyclic **3ea**/**3ea'**:

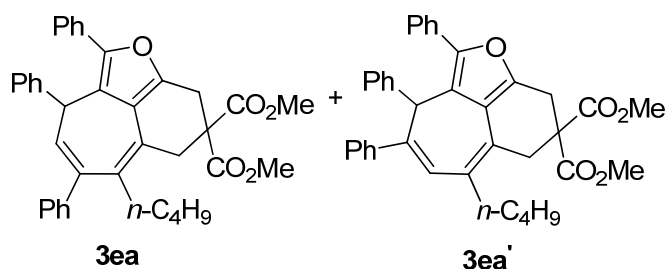

<sup>1</sup>H NMR (300 MHz, CDCl<sub>3</sub>) **3ea**: δ = 7.49 (d, *J* = 7.5 Hz, 2 H), 7.40-7.10 (m, 13 H), 6.31 (d, *J* = 9.6 Hz, 1 H), 5.09 (d, *J* = 9.6 Hz, 1 H), 3.79 (s, 6 H), 3.74-3.62 (m, 1 H), 3.44 (d, *J* = 13.8 Hz, 1 H), 3.26 (d, *J* = 17.1 Hz, 1 H), 2.70 (d, *J* = 13.8 Hz, 1 H), 2.33-2.20 (m, 1 H), 1.78-1.65 (m, 1 H), 0.95-0.45 (m, 7 H), **3ea'**: δ = 7.54 (d, *J* = 7.5 Hz, 2 H), 7.40-7.10 (m, 13 H), 6.24 (s, 1 H), 5.55 (s, 1 H), 3.72-3.65 (m, 6 H), 3.75-3.62 (m, 6 H), 3.74-3.62 (m, 1 H), 3.56 (d, *J* = 17.1 Hz, 1 H), 3.27 (d, *J* = 17.1 Hz, 1 H), 2.83 (d, *J* = 15 Hz, 1 H), 2.55-2.42 (m, 1 H), 2.12-2.00 (m, 1 H), 0.95-0.45 (m, 7 H), <sup>13</sup>C NMR (75 MHz, CDCl<sub>3</sub>) (**3ea** + **3ea'**): δ = 171.36, 171.04, 170.43, 147.74, 147.41, 147.22, 144.96, 144.55, 144.28, 142.42, 142.31, 141.37, 135.11, 132.37, 131.62, 131.12, 128.70, 128.59, 128.47, 128.22, 128.13, 127.84, 127.79, 127.28, 127.17, 127.06, 127.04, 126.95, 126.61, 126.58, 126.10, 126.06, 125.90, 125.74, 125.62, 123.69, 123.21, 121.87, 121.62, 121.49, 56.19, 55.97, 53.11, 52.93, 52.87, 43.83, 39.02, 33.56, 33.30, 31.74, 31.32, 30.81, 29.76, 21.76, 13.94 ppm, MS (70 ev) *m/z* (%): 572 (M<sup>+</sup>, 2.37), 205 (100), HRMS calcd for C<sub>38</sub>H<sub>36</sub>O<sub>5</sub>: 572.2563, found: 572.2568.

## 6. Synthesis of fused 5,6,7-tricyclic **3fa**:

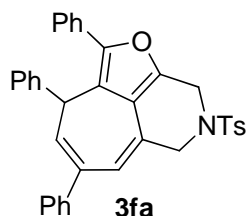

<sup>1</sup>H NMR (300 MHz, CDCl<sub>3</sub>): δ = 7.72 (d, *J* = 8.1 Hz, 2 H), 7.47 (d, *J* = 7.5 Hz, 2 H), 7.41-7.12 (m, 15 H), 6.19 (d, *J* = 8.4 Hz, 1 H), 6.03 (s, 1 H), 5.15 (d, *J* = 8.4 Hz, 1 H), 4.84 (d, *J* = 16.8 Hz, 1H), 4.47 (d, *J* = 14.1 Hz, 1 H), 4.34 (d, *J* = 16.8 Hz, 1 H), 3.86



(d,  $J = 13.8$  Hz, 1 H), 2.38 (s, 3 H), (d,  $J = 8.1$  Hz, 1 H),  $^{13}\text{C}$  NMR (75 MHz,  $\text{CDCl}_3$ ):  $\delta = 148.23, 145.98, 144.74, 143.74$  (2 C), 138.34, 134.12, 130.41, 129.95, 129.54, 128.68, 128.62, 128.24, 128.05, 127.71, 127.49, 127.10, 127.04, 126.93, 126.46, 125.98, 122.23, 120.62, 120.33, 50.02, 43.84, 41.31, 21.50 ppm. MS (70 ev)  $m/z$  (%): 555 ( $\text{M}^+$ , 6.87), 105 (100), HRMS calcd for  $\text{C}_{36}\text{H}_{29}\text{NO}_3\text{S}$ : 555.1868, found: 555.1867.

### 7. Synthesis of fused 5,6,7-tricyclic **3ab/3ab'**:

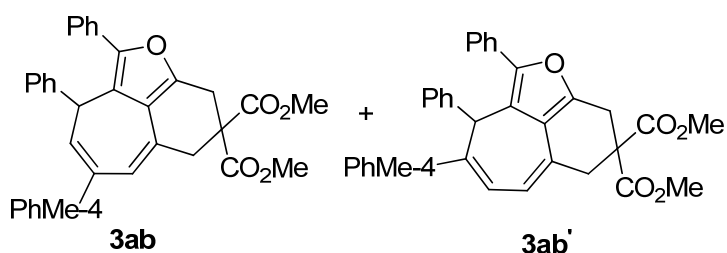

$^1\text{H}$  NMR (300 MHz,  $\text{CDCl}_3$ ) **3ab**:  $\delta = 7.50$  (d,  $J = 7.8$  Hz, 2 H), 7.40-7.07 (m, 12 H), 6.17 (d,  $J = 8.7$  Hz, 1 H), 5.95 (s, 1H), 5.17 (d,  $J = 8.7$  Hz, 1 H), 3.80-3.72 (m, 6 H), 3.64 (d,  $J = 17.1$  Hz, 1 H), 3.30 (d,  $J = 17.1$  Hz, 1 H), 3.11 (s, 2 H), 2.32 (s, 3 H), **3ab'**:  $\delta = 7.56$  (d,  $J = 7.8$  Hz, 2 H), 7.40-7.07 (m, 12 H), 6.34 (d,  $J = 7.5$  Hz, 1 H), 5.82 (d,  $J = 7.5$  Hz, 1 H), 5.62 (s, 1 H), 3.70 (s, 6 H), 3.59 (d,  $J = 16.5$  Hz, 1 H), 3.30-3.20 (m, 1 H), 3.03 (s, 2 H), 2.32 (s, 3 H),  $^{13}\text{C}$  NMR (75 MHz,  $\text{CDCl}_3$ ) (**3ab + 3ab'**):  $\delta = 170.83, 170.22, 148.91, 148.17, 147.80, 143.97, 142.83, 142.27, 140.64, 138.81, 136.53, 130.90, 129.90, 129.12, 128.76, 128.71, 128.56, 128.44, 128.27, 128.16, 127.29, 127.04, 126.98, 126.92, 126.57, 126.22, 126.13, 125.96, 125.57, 123.10, 121.29, 121.01, 120.74, 120.55, 120.20, 56.26, 53.08, 53.04, 45.12, 40.90, 37.96, 37.20, 29.63, 21.00$  ppm. MS (70 ev)  $m/z$  (%): 530 ( $\text{M}^+$ , 51.57), 468 (100), HRMS calcd for  $\text{C}_{35}\text{H}_{30}\text{O}_5$ : 530.2093, found: 530.2096.

### 8. Synthesis of fused 5,6,7-tricyclic **3ac**:

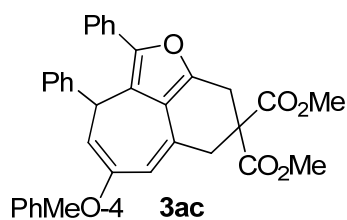

$^1\text{H}$  NMR (300 MHz,  $\text{CDCl}_3$ ):  $\delta$  = 7.51 (d,  $J$  = 8.1 Hz, 2 H), 7.38-7.29 (m, 2 H), 7.27-7.10 (m, 8 H), 6.82 (d,  $J$  = 8.1 Hz, 2 H), 6.15 (d,  $J$  = 8.7 Hz, 1 H), 5.95 (s, 1 H), 5.17 (d,  $J$  = 8.7 Hz, 1 H), 3.75 (s, 9 H), 3.65 (d,  $J$  = 17.1 Hz, 1 H), 3.30 (d,  $J$  = 17.1 Hz, 1 H), 3.11 (s, 2 H),  $^{13}\text{C}$  NMR (75 MHz,  $\text{CDCl}_3$ ):  $\delta$  = 170.76, 170.16, 158.67, 148.86, 147.72, 143.92, 138.40, 137.62, 130.83, 129.89, 128.52, 128.39, 128.13, 127.68, 127.25, 126.97, 126.18, 125.89, 123.14, 120.97, 120.76, 113.40, 56.21, 55.15, 53.04, 53.00, 40.76, 37.91, 29.56 ppm. MS (70 eV)  $m/z$  (%): 546 ( $\text{M}^+$ , 1.85), 484 (100), HRMS calcd for  $\text{C}_{35}\text{H}_{30}\text{O}_6$ : 546.2042, found: 546.2047.

### 9. Synthesis of fused 5,6,7-tricyclic 3ad:

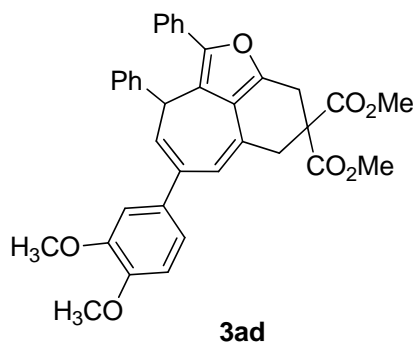

$^1\text{H}$  NMR (300 MHz,  $\text{CDCl}_3$ ):  $\delta$  = 7.51 (d,  $J$  = 7.5 Hz, 2 H),  $\delta$  = 7.39-7.31 (m, 2 H), 7.30-7.21 (m, 5 H), 7.20-7.12 (m, 1 H), 6.90-6.77 (m, 3 H), 6.17 (d,  $J$  = 9.0 Hz, 1H), 5.96 (s, 1 H), 5.18 (d,  $J$  = 9.0 Hz, 1 H), 3.91-3.85 (m, 6 H), 3.77 (s, 3 H), 3.74 (s, 3 H), 3.64 (d,  $J$  = 17.1 Hz, 1 H), 3.32 (d,  $J$  = 17.1 Hz, 1 H), 3.12 (s, 1 H),  $^{13}\text{C}$  NMR (75 MHz,  $\text{CDCl}_3$ ):  $\delta$  = 170.83, 170.21, 148.92, 148.48, 148.23, 147.80, 143.89, 138.85, 138.19, 130.88, 129.97, 128.58, 128.45, 127.87, 127.33, 127.05, 126.25, 125.98, 123.17, 120.98, 120.80, 119.38, 110.79, 56.29, 55.89, 53.12, 53.00, 40.81, 37.98, 29.60 ppm. MS (70 eV)  $m/z$  (%): 576 ( $\text{M}^+$ , 100), HRMS calcd for  $\text{C}_{36}\text{H}_{32}\text{O}_7$ : 576.2148, found: 576.2150.

### 10. Synthesis of fused 5,6,7-tricyclic 3ae'

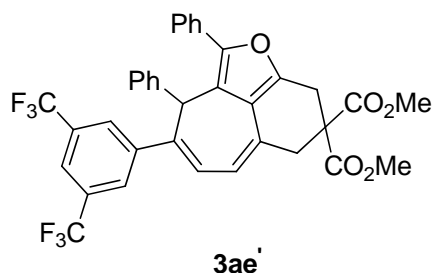

<sup>1</sup>H NMR (300 MHz, CDCl<sub>3</sub>): δ = 7.87 (s, 2 H), 7.80 (s, 1 H), 7.59 (d, *J* = 7.5 Hz, 2 H), 7.48-7.39 (m, 2 H), 7.38-7.30 (m, 1 H), 7.29-7.19 (m, 3 H), 7.18-7.10 (m, 2 H), 6.48 (d, *J* = 7.2 Hz, 1 H), 5.93 (d, *J* = 7.2 Hz, 1 H), 5.57 (s, 1 H), 3.78 (s, 6 H), 3.67 (d, *J* = 17.1 Hz, 1 H), 3.33 (d, *J* = 17.1 Hz, 1 H), 3.12 (s, 2 H), <sup>13</sup>C NMR (75 MHz, CDCl<sub>3</sub>): δ = 170.63, 170.08, 149.18, 148.26, 147.17, 142.02, 137.83, 131.94, 131.78 (q, *J* = 22 Hz), 130.53, 129.01, 128.84, 128.54, 127.85, 126.83, 126.68, 126.25, 123.29 (q, *J* = 272 Hz), 120.89, 120.47, 119.90, 119.29, 56.23, 53.09, 45.25, 37.23, 29.47 ppm. MS (70 ev) *m/z* (%): 652 (M<sup>+</sup>, 5.82), 105 (100), HRMS calcd for C<sub>36</sub>H<sub>26</sub>O<sub>5</sub>F<sub>6</sub>: 652.1684, found: 652.1682.

### 11. Synthesis of fused 5,6,7-tricyclic 3af'

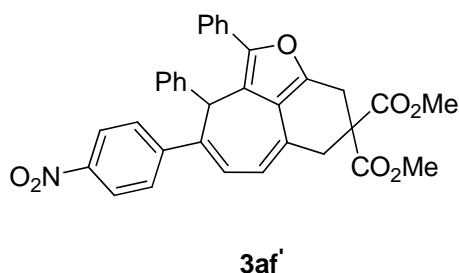

<sup>1</sup>H NMR (300 MHz, CDCl<sub>3</sub>): δ = 8.17 (d, *J* = 8.7 Hz, 2 H), 7.59- 7.49 (m, 4 H), 7.45-7.28 (m, 3 H), 7.22-7.15 (m, 3 H), 7.12-7.05 (m, 2 H), 6.48 (d, *J* = 7.5 Hz, 1 H), 5.89 (d, *J* = 7.5 Hz, 1 H), 5.57 (s, 1 H), 3.74 (s, 6 H), 3.62 (d, *J* = 17.1 Hz, 1 H), 3.28 (d, *J* = 17.1 Hz, 1 H), 3.08 (s, 2 H), <sup>13</sup>C NMR (75 MHz, CDCl<sub>3</sub>): δ = 170.53, 170.04, 151.50, 149.12, 148.13, 146.41, 142.02, 138.49, 131.87, 130.52, 129.22, 128.79, 128.43, 127.68, 127.21, 126.67, 126.62, 126.12, 123.79, 120.93, 119.84, 119.42, 56.12, 53.06, 45.01, 37.15, 29.40 ppm. MS (70 ev) *m/z* (%): 561 (M<sup>+</sup>, 3.46), 469 (100), HRMS calcd for C<sub>34</sub>H<sub>27</sub>NO<sub>7</sub>: 561.1788, found: 561.1785.

## 12. Synthesis of fused 5,6,7-tricyclic **3bg'**:

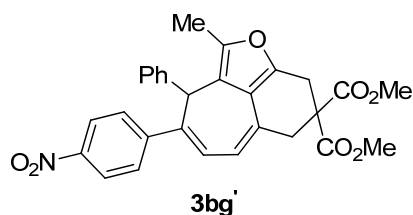

<sup>1</sup>H NMR (300 MHz, CDCl<sub>3</sub>): δ = 8.12 (d, *J* = 8.4 Hz, 2 H), 7.47 (d, *J* = 8.4 Hz, 2 H), 7.25-7.15 (m, 4 H), 6.42 (d, *J* = 7.8 Hz, 1 H), 5.84 (d, *J* = 7.8 Hz, 1H), 4.98 (s, 1 H), 3.72 (s, 6 H), 3.45 (d, *J* = 16.8 Hz, 1 H), 3.13 (d, *J* = 16.8 Hz, 1 H), 3.04 (s, 2 H), 2.31 (s, 3 H), <sup>13</sup>C NMR (75 MHz, CDCl<sub>3</sub>): δ = 170.71, 170.21, 151.95, 147.74, 146.40, 146.36, 143.61, 138.25, 132.17, 129.14, 128.71, 127.92, 127.25, 126.70, 123.64, 119.29, 119.17, 118.39, 56.28, 53.06, 46.08, 37.14, 29.37, 11.70 ppm. MS (70 ev) *m/z* (%): 499 (M<sup>+</sup>, 9.91), 105 (100), HRMS calcd for C<sub>29</sub>H<sub>25</sub>NO<sub>7</sub>: 499.1631, found: 499.1633.

## 13. Synthesis of fused 5,6,7-tricyclic **3ag/3ag'**:

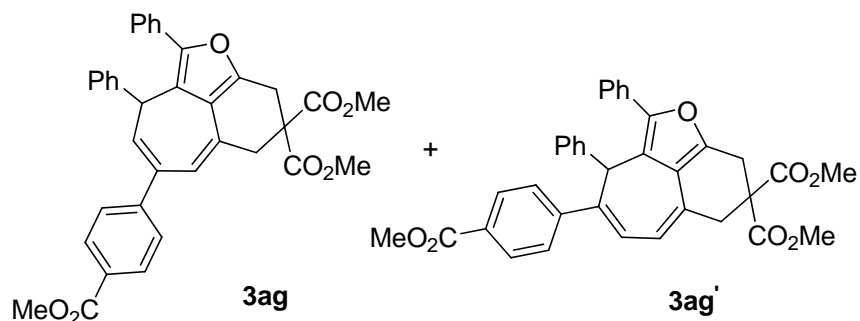

<sup>1</sup>H NMR (300 MHz, CDCl<sub>3</sub>) **3ag**: δ = 8.00 (d, *J* = 8.1 Hz, 2 H), 7.62-7.11 (m, 12 H), 6.29 (d, *J* = 8.7 Hz, 1 H), 5.97 (s, 1 H), 5.24 (d, *J* = 8.7 Hz, 1 H), 3.92 (s, 3 H), 3.82-3.75 (m, 6 H), 3.70-3.60 (m, 1 H), 3.36 (d, *J* = 17.1 Hz, 2 H), 3.18 (s, 2 H), **3ag'**: δ = 8.00 (d, *J* = 8.1 Hz, 2 H), 7.62-7.11 (m, 12 H), 6.47 (d, *J* = 7.5 Hz, 1 H), 5.89 (d, *J* = 7.5 Hz, 1 H), 5.66 (s, 1 H), 3.92 (s, 3 H), 3.75 (s, 6 H), 3.64 (d, *J* = 17.1 Hz, 1 H), 3.31 (d, *J* = 17.1 Hz, 1 H), 3.09 (s, 2H); <sup>13</sup>C NMR (75 MHz, CDCl<sub>3</sub>) (**3ag** + **3ag'**): δ = 170.64, 170.09, 166.78, 149.60, 149.55, 149.19, 148.69, 148.00, 143.56, 142.39, 139.68, 138.17, 130.79, 130.73, 130.70, 130.66, 130.21, 130.16, 129.76, 129.46, 128.73, 128.53, 128.39, 128.27, 127.74, 127.51, 127.38, 127.00, 126.97, 126.74,

126.55, 126.44, 126.38, 126.09, 125.93, 121.93, 121.10, 120.80, 120.25, 120.15, 119.75, 56.16, 53.08, 53.00, 51.93, 44.99, 41.00, 37.88, 37.16, 29.56, 29.44 ppm. MS (70 ev)  $m/z$  (%): 574 ( $M^+$ , 100), HRMS calcd for  $C_{36}H_{30}O_7$ : 574.1992, found: 574.1990.

#### 14. Synthesis of fused 5,6,7-tricyclic **3ah/3ah'**:

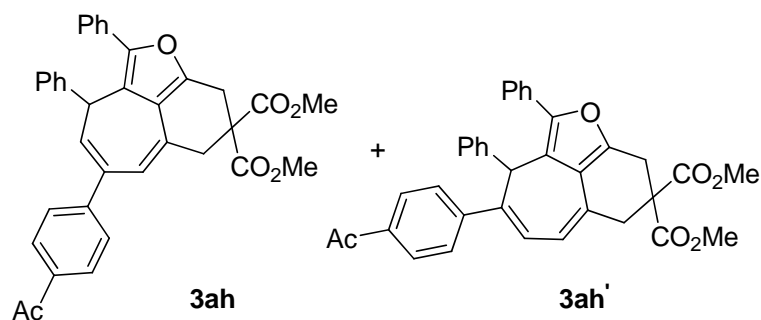

<sup>1</sup>H NMR (300 MHz, CDCl<sub>3</sub>) **3ah**:  $\delta$  = 7.90 (d,  $J$  = 7.8 Hz, 2 H), 7.58-7.05 (m, 12 H), 6.26 (d,  $J$  = 8.7 Hz, 1 H), 5.93 (s, 1 H), 5.20 (d,  $J$  = 8.7 Hz, 1 H), 3.82-3.75 (m, 6 H), 3.66 (d,  $J$  = 17.1 Hz, 1 H), 3.33 (d,  $J$  = 17.1 Hz, 1 H), 3.14 (s, 2 H), 2.58 (s, 3 H), **3ah'**:  $\delta$  = 7.90 (d,  $J$  = 7.8 Hz, 2 H), 7.58-7.05 (m, 12 H), 6.44 (d,  $J$  = 7.5 Hz, 1 H), 5.86 (d,  $J$  = 7.5 Hz, 1 H), 5.62 (s, 1 H), 3.72 (s, 6 H), 3.60 (d,  $J$  = 17.1 Hz, 1 H), 3.27 (d,  $J$  = 17.1 Hz, 1 H), 3.06 (s, 2 H), 2.58 (s, 3 H), <sup>13</sup>C NMR (75 MHz, CDCl<sub>3</sub>) (**3ah** + **3ah'**):  $\delta$  = 197.48, 170.68, 170.14, 149.72, 148.76, 148.05, 142.40, 139.64, 135.46, 130.91, 130.74, 128.78, 128.64, 128.58, 128.32, 127.94, 127.57, 127.23, 127.01, 126.76, 126.74, 126.51, 126.14, 125.98, 121.12, 120.15, 119.76, 56.20, 53.06, 44.96, 37.02, 29.47, 26.50 ppm. MS (70 ev)  $m/z$  (%): 558 ( $M^+$ , 2.31), 105 (100), HRMS calcd for  $C_{36}H_{30}O_6$ : 558.2042, found: 558.2065.

#### 15. Synthesis of fused 5,6,7-tricyclic **3ai**:

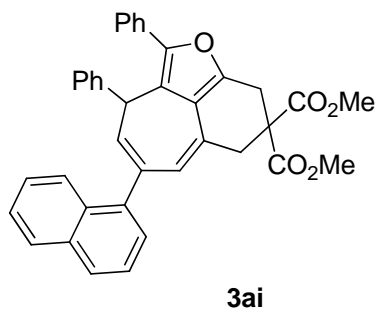

$^1\text{H}$  NMR (300 MHz,  $\text{CDCl}_3$ ):  $\delta$  = 7.85-7.76 (m, 1 H), 7.71 (d,  $J$  = 8.1 Hz, 1 H), 7.60-7.46 (m, 2 H), 7.43-7.26 (m, 9 H), 7.25-7.15 (m, 4 H), 6.09 (d,  $J$  = 7.8 Hz, 1 H), 5.79 (s, 1 H), 5.17 (d,  $J$  = 7.8 Hz, 1 H), 3.80-3.62 (m, 7 H), 3.37-3.20 (m, 1 H), 3.19-3.08 (m, 1 H), 3.00 (d,  $J$  = 14.7 Hz, 1 H), 170.79, 170.20, 149.09, 148.71, 147.87, 144.42, 143.40, 137.73, 133.54, 131.41, 130.94, 130.80, 128.74, 128.60, 128.53, 128.16, 128.03, 127.31, 127.10, 127.03, 126.32, 125.97, 125.71, 125.58, 125.33, 124.27, 121.08, 120.69, 56.06, 53.01, 41.53, 37.71, 29.62 ppm. MS (70 ev)  $m/z$  (%): 566 ( $\text{M}^+$ , 88.48), 504 (100), HRMS calcd for  $\text{C}_{38}\text{H}_{30}\text{O}_5$ : 566.2093, found: 566.2095.

### 16. Synthesis of fused 5,6,7-tricyclic **3aj/3aj'**:

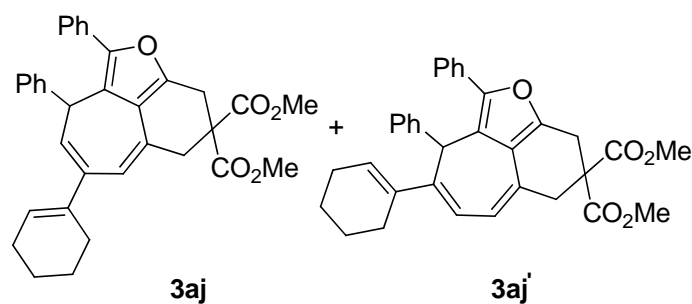

$^1\text{H}$  NMR (300 MHz,  $\text{CDCl}_3$ ) **3aj**:  $\delta$  = 7.50 (d,  $J$  = 7.8 Hz, 2 H), 7.45-7.00 (m, 8 H), 6.07 (d,  $J$  = 9 Hz, 1 H), 5.80 (s, 1 H), 5.72-5.68 (m, 1 H), 5.07 (d,  $J$  = 9 Hz, 1 H), 3.85-3.67 (m, 6 H), 3.62 (d,  $J$  = 17.1 Hz, 1 H), 3.24 (d,  $J$  = 17.1 Hz, 1 H), 3.04 (s, 2 H), 2.35-1.98 (m, 4 H), 1.80-1.48 (m, 4 H); **3aj'**:  $\delta$  = 7.59 (d,  $J$  = 7.8 Hz, 2 H), 7.45-7.00 (m, 8 H), 6.16 (d,  $J$  = 7.5 Hz, 1H), 5.75-5.65 (m, 1 H), 5.61-5.45 (m, 2 H), 3.85-3.67 (m, 6 H), 3.55-3.35 (m, 1 H), 3.14 (d,  $J$  = 7.5 Hz, 1 H), 3.00 (m, 2 H), 2.35-1.98 (m, 4 H), 1.80-1.48 (m, 4 H),  $^{13}\text{C}$  NMR (75 MHz,  $\text{CDCl}_3$ ) (**3aj**+ **3aj'**):  $\delta$  = 170.89, 170.17, 148.43, 147.51, 143.85, 140.61, 140.41, 131.00, 128.92, 128.67, 128.52, 128.24, 127.89, 127.77, 127.24, 127.14, 126.99, 126.85, 126.21, 126.03, 125.84, 125.55, 125.04, 124.73, 124.17, 122.27, 121.79, 121.25, 121.09, 56.28, 53.03, 52.94, 40.30, 37.95, 29.57, 27.95, 25.62, 23.05, 22.06 ppm. MS (70 ev)  $m/z$  (%): 520 ( $\text{M}^+$ , 100), HRMS calcd for  $\text{C}_{34}\text{H}_{32}\text{O}_5$ : 520.2250, found: 520.2251.

### 17. Synthesis of fused 5,6,7-tricyclic **3ak/3ak'**:

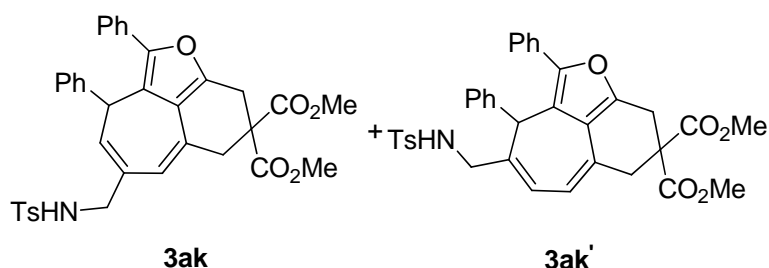

<sup>1</sup>H NMR (300 MHz, CDCl<sub>3</sub>) **3ak**: δ = 7.64 (d, *J* = 7.8 Hz, 2 H), 7.54 (d, *J* = 7.8 Hz, 2 H), 7.42-7.08 (m, 10 H), 5.79 (d, *J* = 8.7 Hz, 1 H), 5.53 (s, 1 H), 4.84 (d, *J* = 8.7 Hz, 1 H), 4.65-4.55 (m, 1 H), 3.90 (d, *J* = 3.6 Hz, 2 H), 3.75-3.65 (m, 6 H), 3.58-3.50 (m, 1 H), 3.26 (d, *J* = 14.1 Hz, 1 H), 3.07-3.00 (m, 2 H), 2.32 (s, 3 H), **3ak'**: δ = 7.64 (d, *J* = 7.8 Hz, 2 H), 7.54 (d, *J* = 7.8 Hz, 2 H), 7.42-7.08 (m, 10 H), 5.87 (d, *J* = 7.5 Hz, 1H), 5.62 (d, *J* = 7.2 Hz, 1 H), 5.03 (s, 1 H), 4.80-4.72 (m, 1 H), 3.77 (d, *J* = 3.6 Hz, 2 H), 3.75-3.65 (m, 6 H), 3.58-3.50 (m, 1 H), 3.20 (d, *J* = 17.1 Hz, 1 H), 3.07-3.00 (m, 2 H), 2.37 (s, 3 H), <sup>13</sup>C NMR (75 MHz, CDCl<sub>3</sub>) (**3ak** + **3ak'**): δ = 170.70, 170.19, 148.78, 147.86, 143.62, 143.26, 136.99, 136.17, 130.58, 129.59, 129.54, 128.58, 128.47, 127.45, 126.99, 126.88, 126.58, 126.26, 125.88, 125.58, 120.79, 119.83, 118.49, 55.91, 53.07, 53.04, 51.47, 42.81, 37.32, 29.44, 21.39 ppm. MS (70 ev) *m/z* (%): 623 (M<sup>+</sup>, 2.63), 392 (100), HRMS calcd for C<sub>36</sub>H<sub>33</sub>NO<sub>7</sub>S: 623.1978, found: 623.1979.

### 18. Synthesis of fused 5,6,7-tricyclic **3al/3al'**:

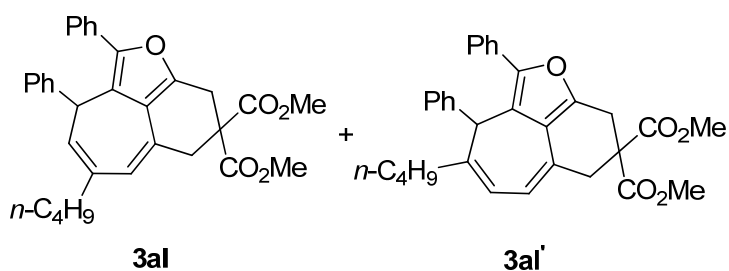

<sup>1</sup>H NMR (300 MHz, CDCl<sub>3</sub>) **3al**: δ = 7.48 (d, *J* = 7.8 Hz, 2 H), 7.42-7.09 (m, 8 H), 5.81 (d, *J* = 7.8 Hz, 1 H), 5.59 (s, 1 H), 4.94 (d, *J* = 7.8 Hz, 1 H), 3.80-3.65 (m, 6 H), 3.61 (d, *J* = 17.4 Hz, 1 H), 3.28-3.22 (m, 1 H), 3.10-3.00 (m, 2 H), 2.40-2.16 (m, 4 H), 1.48-1.16 (m, 3 H), 0.85 (t, *J* = 7.2 Hz, 3 H), **3al'**: δ = 7.56 (d, *J* = 7.8 Hz, 2 H), 7.42-7.09 (m, 8 H), 5.81 (d, *J* = 7.8 Hz, 1 H), 5.67 (d, *J* = 7.8 Hz, 1 H), 4.89 (s, 1 H),

3.80-3.65 (m, 6 H), 3.55 (d,  $J = 18$  Hz, 1 H), 3.20-3.15 (m, 1 H), 3.10-3.00 (m, 2 H), 2.40-2.16 (m, 4 H), 1.48-1.16 (m, 3 H), 0.85 (t,  $J = 7.2$  Hz, 3 H),  $^{13}\text{C}$  NMR (75 MHz,  $\text{CDCl}_3$ ) (**3al** + **3al'**):  $\delta = 170.90, 170.33, 170.18, 148.45, 147.95, 147.46, 147.32, 144.74, 143.97, 142.81, 137.58, 131.13, 131.00, 128.75, 128.56, 128.47, 128.34, 128.24, 127.68, 127.23, 127.12, 126.96, 126.26, 126.20, 126.02, 125.90, 123.58, 121.96, 121.09, 120.92, 120.77, 119.97, 56.14, 56.05, 53.02, 52.98, 52.93, 52.90, 45.89, 40.95, 40.72, 40.56, 37.87, 37.27, 31.90, 30.60, 29.57, 29.53, 22.38, 22.01, 13.90$  ppm. MS (70 ev)  $m/z$  (%): 496 ( $\text{M}^+$ , 57.41), 439 (100), HRMS calcd for  $\text{C}_{32}\text{H}_{32}\text{O}_5$ : 496.2250, found: 496.2249.

### 19. Synthesis of fused 5,6,7-tricyclic **3am/3am'**:

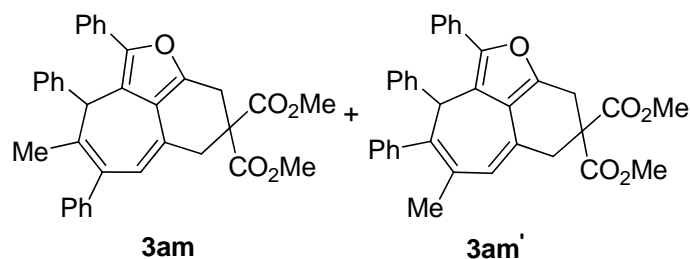

$^1\text{H}$  NMR (300 MHz,  $\text{CDCl}_3$ ) **3am**: 7.49 (d,  $J = 7.8$  Hz, 2 H), 7.41-7.08 (m, 13 H), 5.73 (s, 1 H), 5.26 (s, 1 H), 3.81-3.58 (m, 7 H), 3.27 (s, 1 H), 3.00 (s, 2 H), 1.75 (s, 3 H), **3am'**:  $\delta = 7.59$  (d,  $J = 7.8$  Hz, 2 H), 7.41-7.08 (m, 13 H), 5.63 (s, 1 H), 5.03 (s, 1 H), 3.81-3.58 (m, 7 H), 3.21 (s, 1 H), 2.95 (s, 2 H), 1.97 (s, 3 H),  $^{13}\text{C}$  NMR (75 MHz,  $\text{CDCl}_3$ ) (**3am** + **3am'**):  $\delta = 170.87, 170.35, 148.09, 147.79, 147.34, 146.33, 145.36, 142.79, 142.69, 136.59, 135.65, 134.57, 131.03, 130.67, 128.72, 128.65, 128.25, 128.16, 127.98, 127.79, 127.28, 127.22, 127.13, 126.85, 126.59, 126.22, 126.08, 126.00, 125.74, 125.59, 125.02, 121.64, 121.02, 120.80, 56.48, 56.39, 53.04, 52.95, 52.91, 47.94, 47.08, 37.43, 29.60, 26.36, 24.24$  ppm. MS (70 ev)  $m/z$  (%): 530 ( $\text{M}^+$ , 15.83), 105 (100), HRMS calcd for  $\text{C}_{35}\text{H}_{30}\text{O}_5$  530.2093, found: 530.2092.



## 26. Synthesis of fused 5, 6, 7-tricyclic 3an:

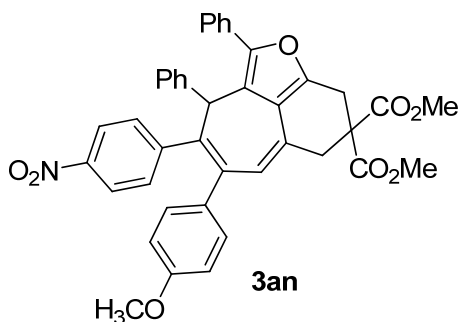

$^1\text{H}$  NMR (300 MHz,  $\text{CDCl}_3$ ):  $\delta$  = 7.93 (d,  $J$  = 8.1 Hz, 2 H), 7.44 (d,  $J$  = 7.8 Hz, 2 H), 7.36-7.17 (m, 10 H), 6.93 (d,  $J$  = 8.1 Hz, 2 H), 6.67 (d,  $J$  = 8.1 Hz, 2 H), 5.86 (s, 1 H), 5.46 (s, 1 H), 3.78 (s, 3 H), 3.74 (s, 6 H), 3.68 (d,  $J$  = 17.1 Hz, 1 H), 3.31 (d,  $J$  = 17.1 Hz, 1 H), 3.00 (q,  $J$  = 14.1 Hz, 2 H),  $^{13}\text{C}$  NMR (75 MHz,  $\text{CDCl}_3$ ):  $\delta$  = 170.66, 170.18, 158.47, 152.67, 149.01, 148.18, 145.56, 141.66, 140.19, 136.18, 134.37, 131.17, 130.62, 128.83, 128.33, 127.60, 126.92, 126.64, 125.73, 125.40, 123.10, 120.73, 113.45, 56.58, 55.13, 53.14, 53.08, 47.15, 37.37, 29.54 ppm. MS (70 ev)  $m/z$  (%): 667 ( $\text{M}^+$ , 18.10), 81 (100), HRMS calcd for  $\text{C}_{41}\text{H}_{33}\text{NO}_8$ : 667.2206, found: 667.2191.

## 27. Synthesis of fused 5, 6, 7-tricyclic 3ao:

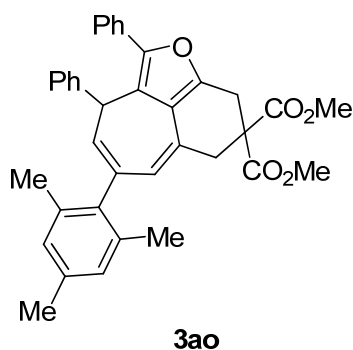

$^1\text{H}$  NMR (400 MHz,  $\text{CDCl}_3$ ):  $\delta$  = 7.48 (d,  $J$  = 7.6 Hz, 2 H), 7.40-7.10 (m, 8 H), 6.79 (d,  $J$  = 9.2 Hz, 2 H), 5.71 (d,  $J$  = 8.4 Hz, 1 H), 5.48 (s, 1 H), 5.01 (d,  $J$  = 8.4 Hz, 1 H), 3.80 (s, 3 H), 3.73 (d,  $J$  = 17.2 Hz, 1 H), 3.67 (s, 3 H), 3.22 (d,  $J$  = 17.2 Hz, 1 H), 3.14 (d,  $J$  = 14.4 Hz, 1 H), 3.00 (d,  $J$  = 14.4 Hz, 1 H), 2.24 (s, 3 H), 2.07 (s, 3 H), 1.79 (s, 3 H),  $^{13}\text{C}$  NMR (75 MHz,  $\text{CDCl}_3$ ):  $\delta$  = 170.93, 170.17, 148.90, 147.73, 144.40, 141.36, 136.61, 135.94, 135.63, 135.59, 130.79, 129.87, 129.36, 128.00, 127.72, 127.22, 126.97, 126.16, 125.87, 123.22, 121.14, 120.47, 55.96, 53.09, 52.95, 41.77, 37.70,

29.59, 20.89, 19.72, 19.50 ppm. MS (70 eV)  $m/z$  (%): 558 ( $M^+$ , 13.06), 43 (100),  
HRMS calcd for  $C_{37}H_{34}NO_5$ : 558.2406, found: 558.2410.

7.569  
7.543  
7.517  
7.491  
7.400  
7.374  
7.349  
7.326  
7.303  
7.284  
7.271  
7.233  
7.220  
7.201  
7.149  
7.127  
6.362  
6.337  
6.203  
6.174  
5.961  
5.845  
5.820  
5.635  
5.195  
5.166

3.742  
3.693  
3.618  
3.565  
3.330  
3.276  
3.118  
3.036

zwx-3-001

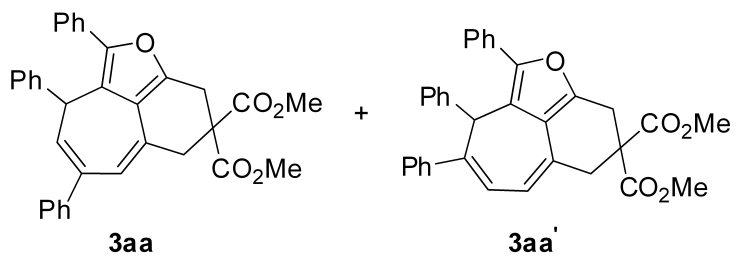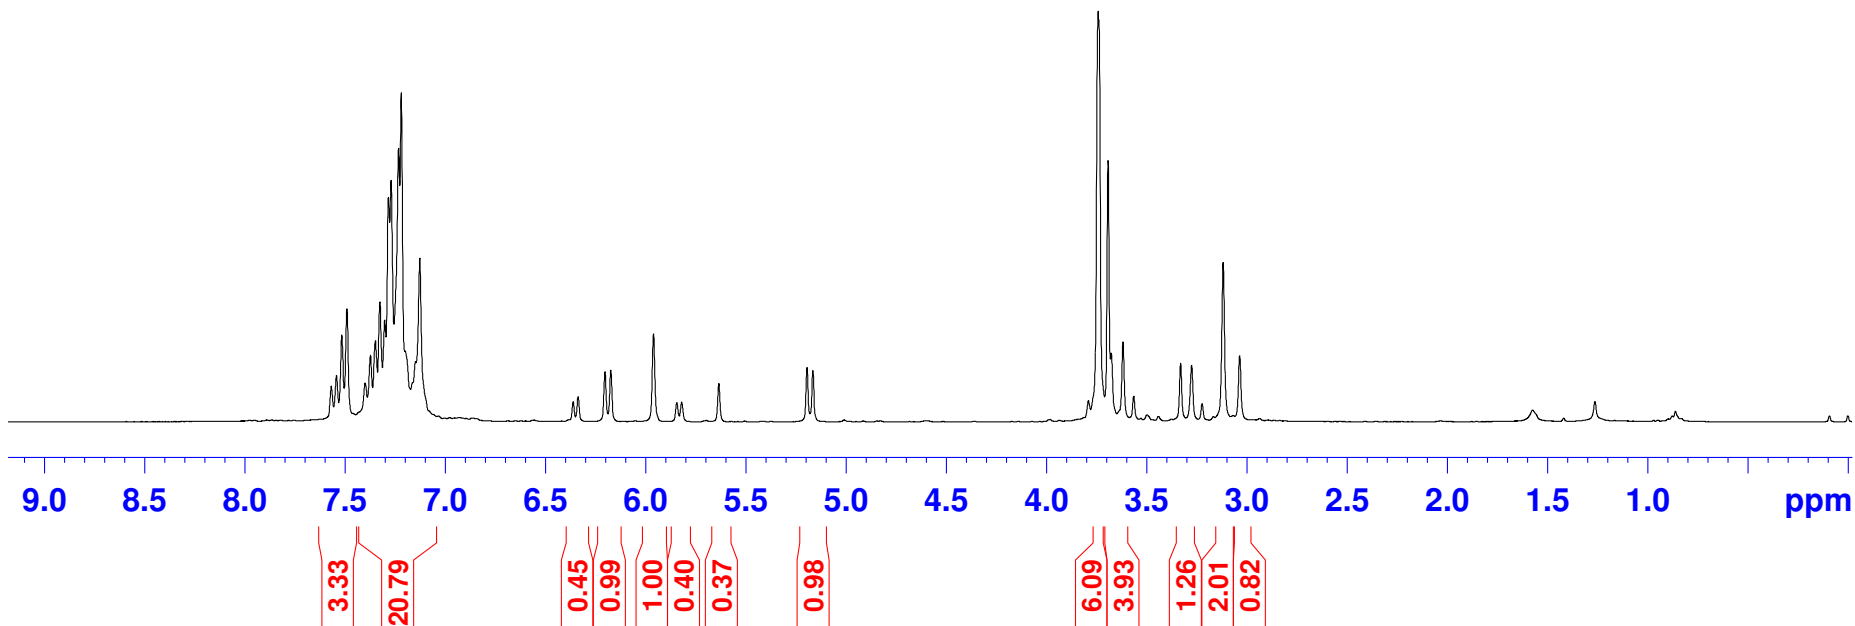

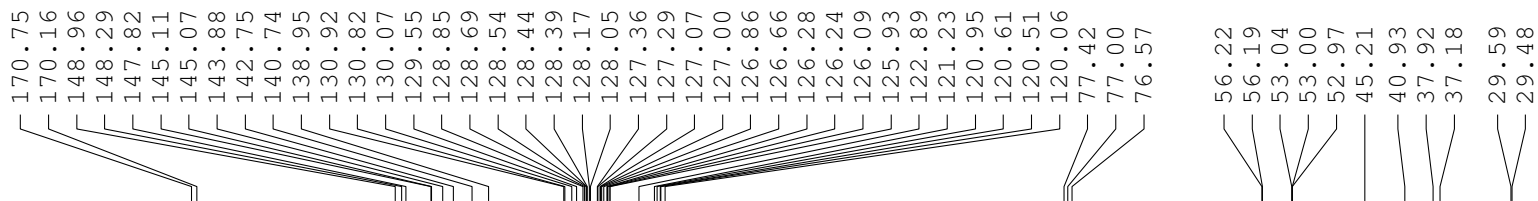

zwx-3-001

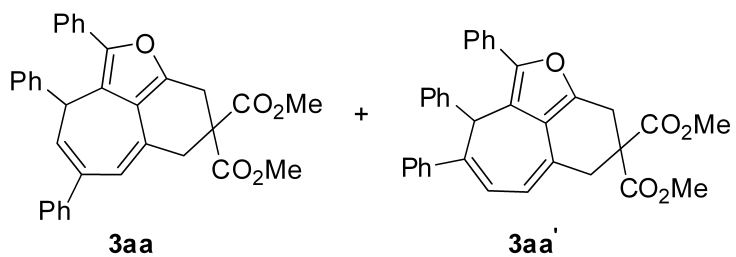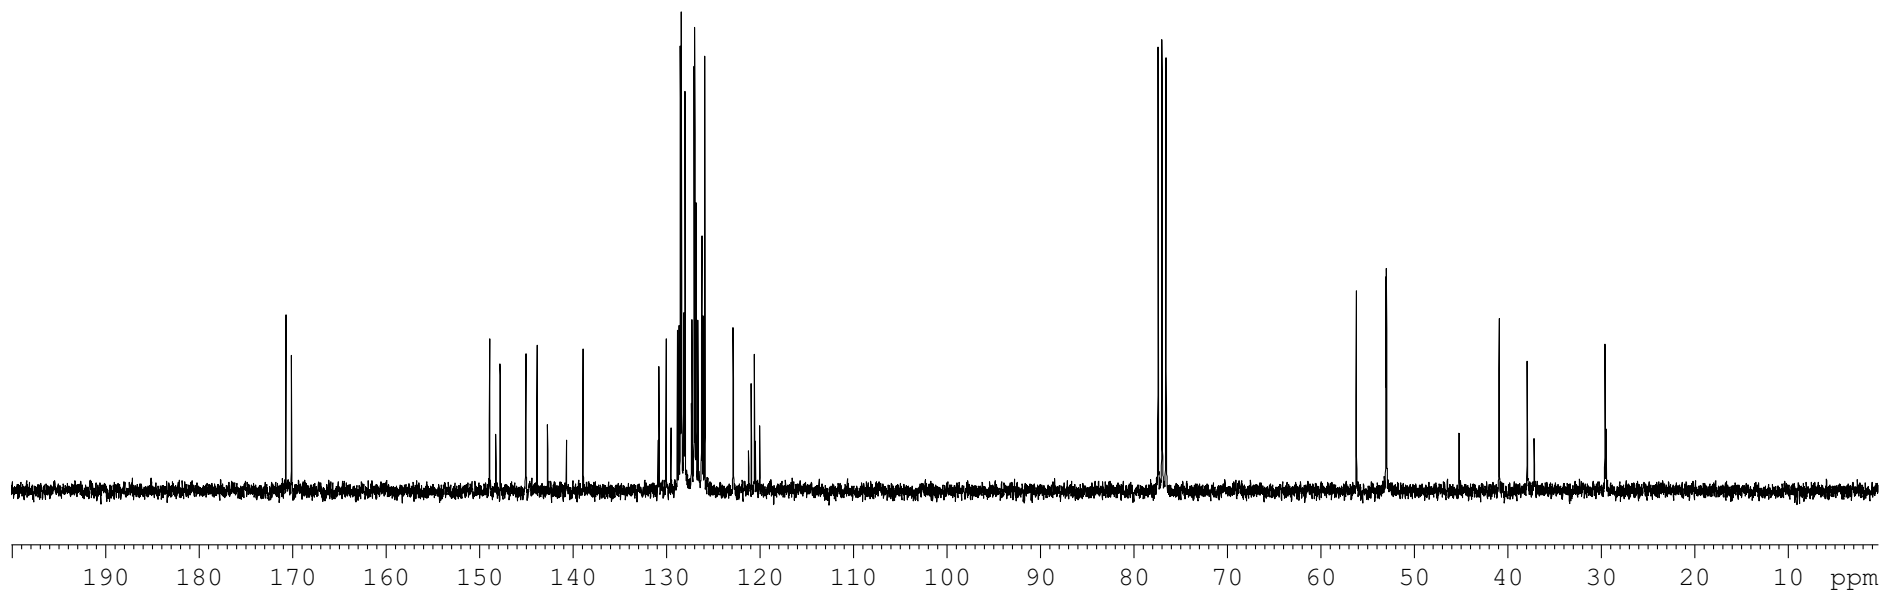

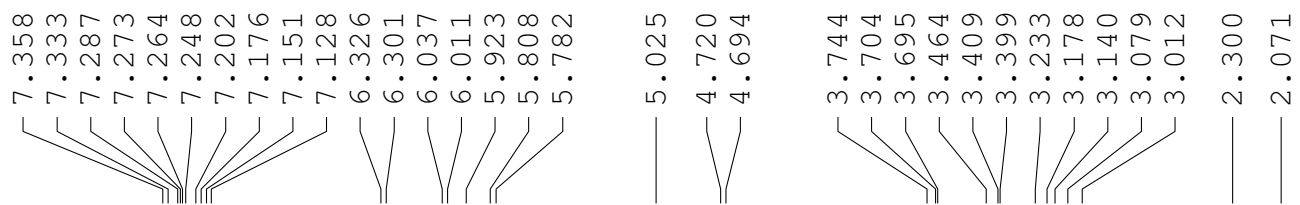

zwx-3-60

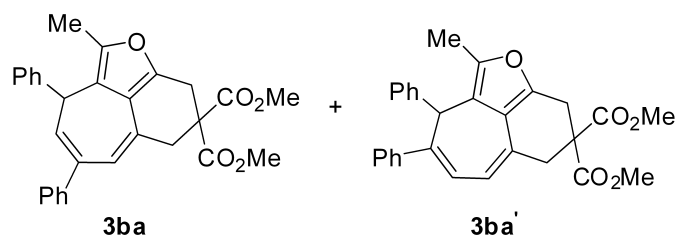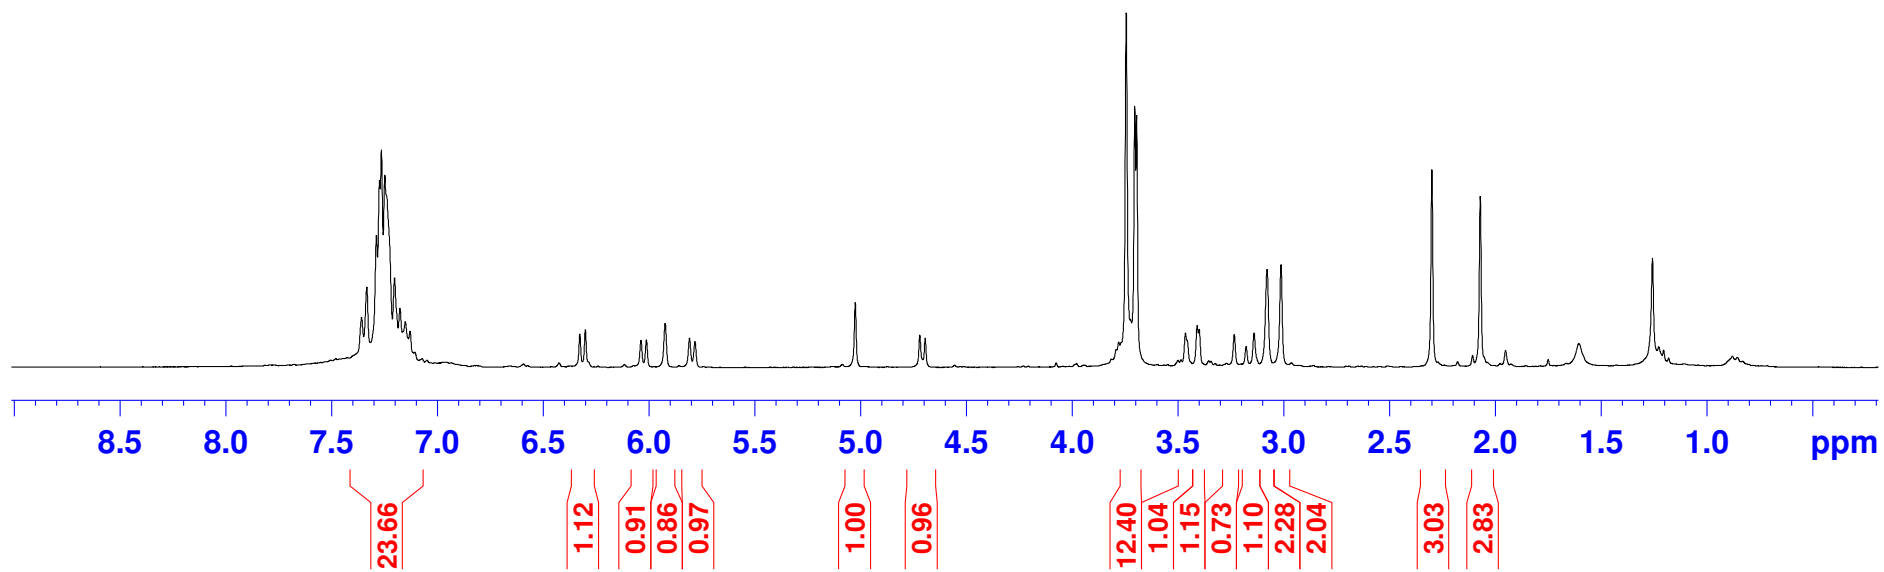

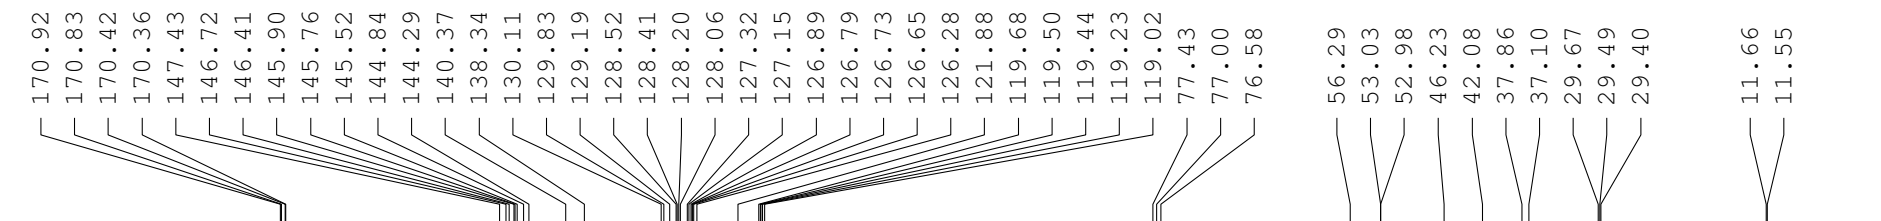

zwx-3-60

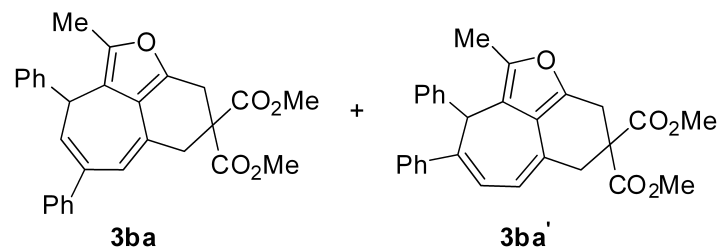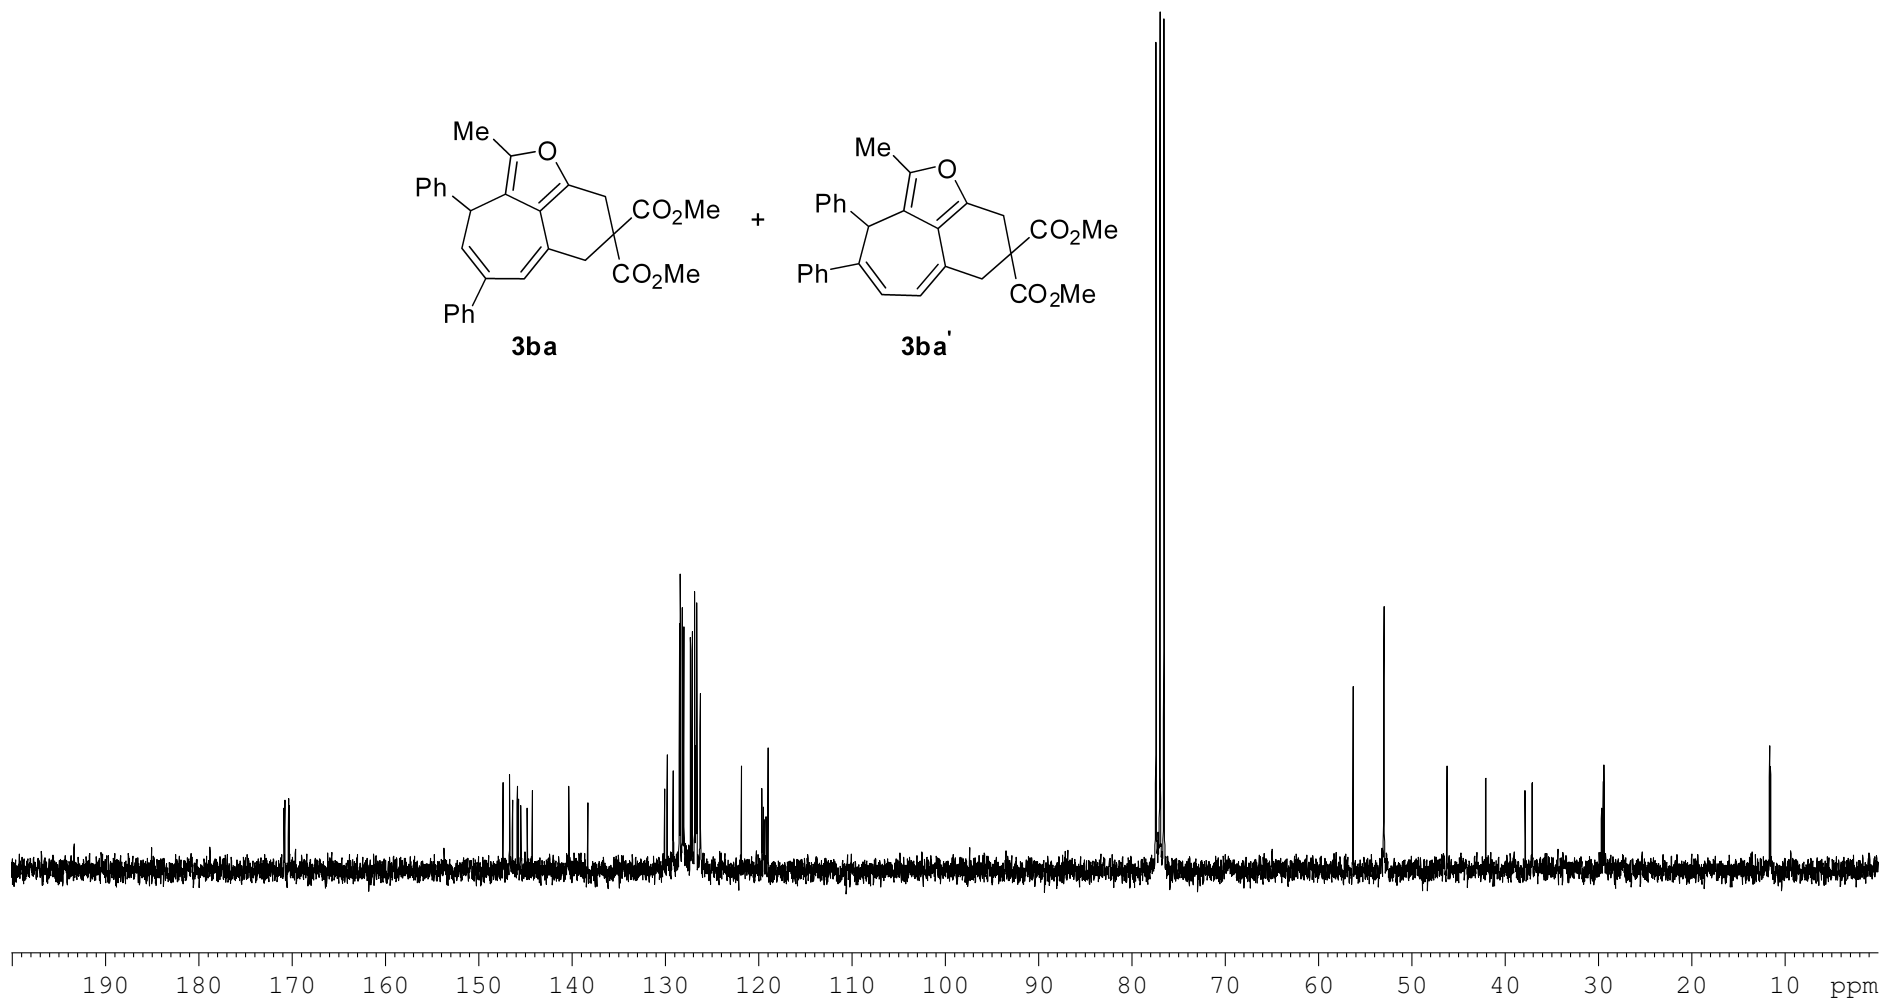

7.493  
7.465  
7.445  
7.417  
7.386  
7.360  
7.348  
7.325  
7.298  
7.274  
7.242  
7.220  
7.184  
7.165  
7.143  
7.125  
7.107  
7.081  
6.355  
6.330  
6.186  
6.157  
5.965  
5.854  
5.829  
5.551  
5.130  
5.101  
3.794  
3.778  
3.758  
3.721  
3.665  
3.609  
3.559  
3.321  
3.267  
3.213  
3.117  
3.037

zwx-3-61

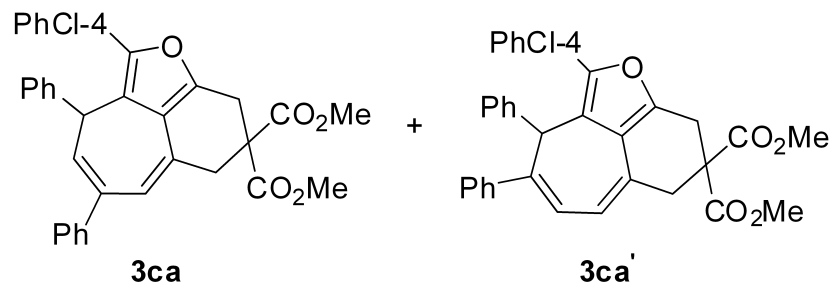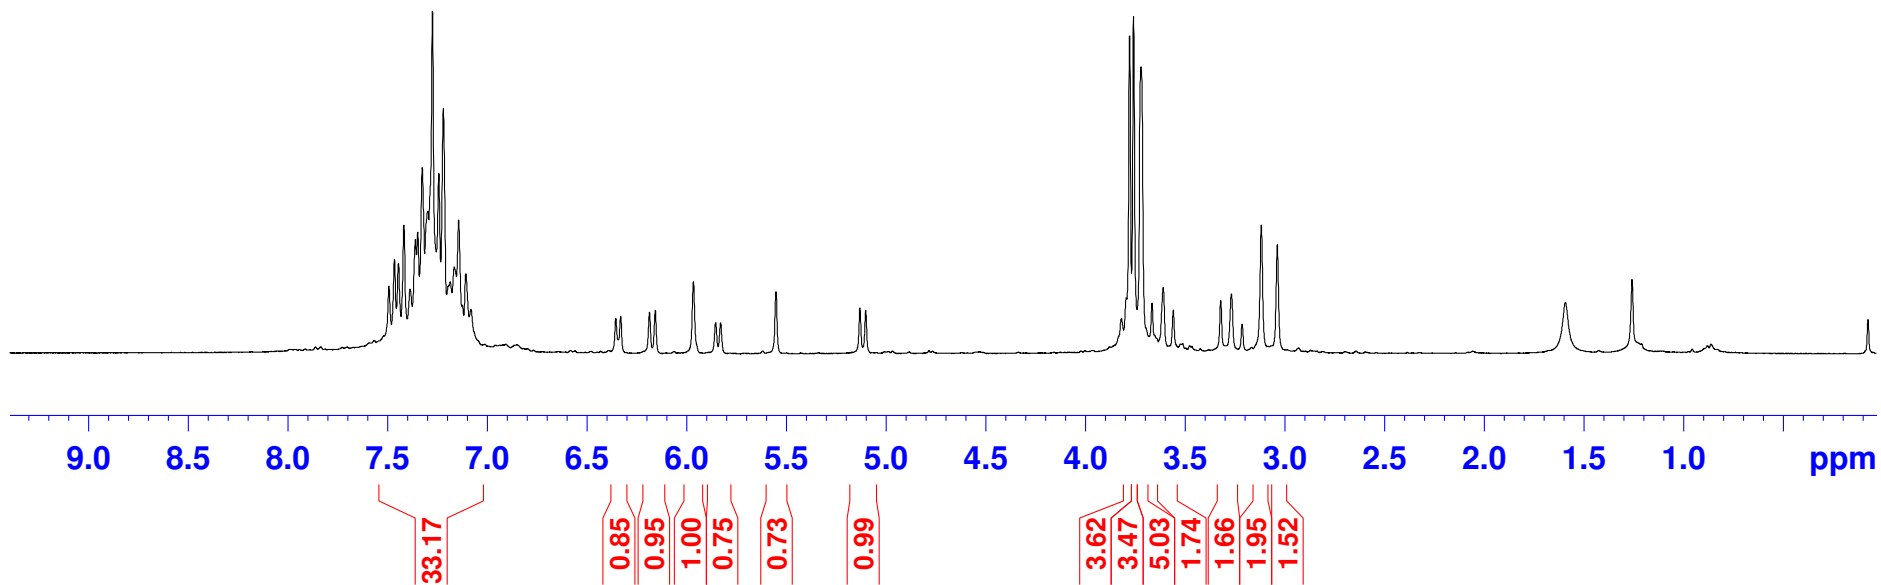

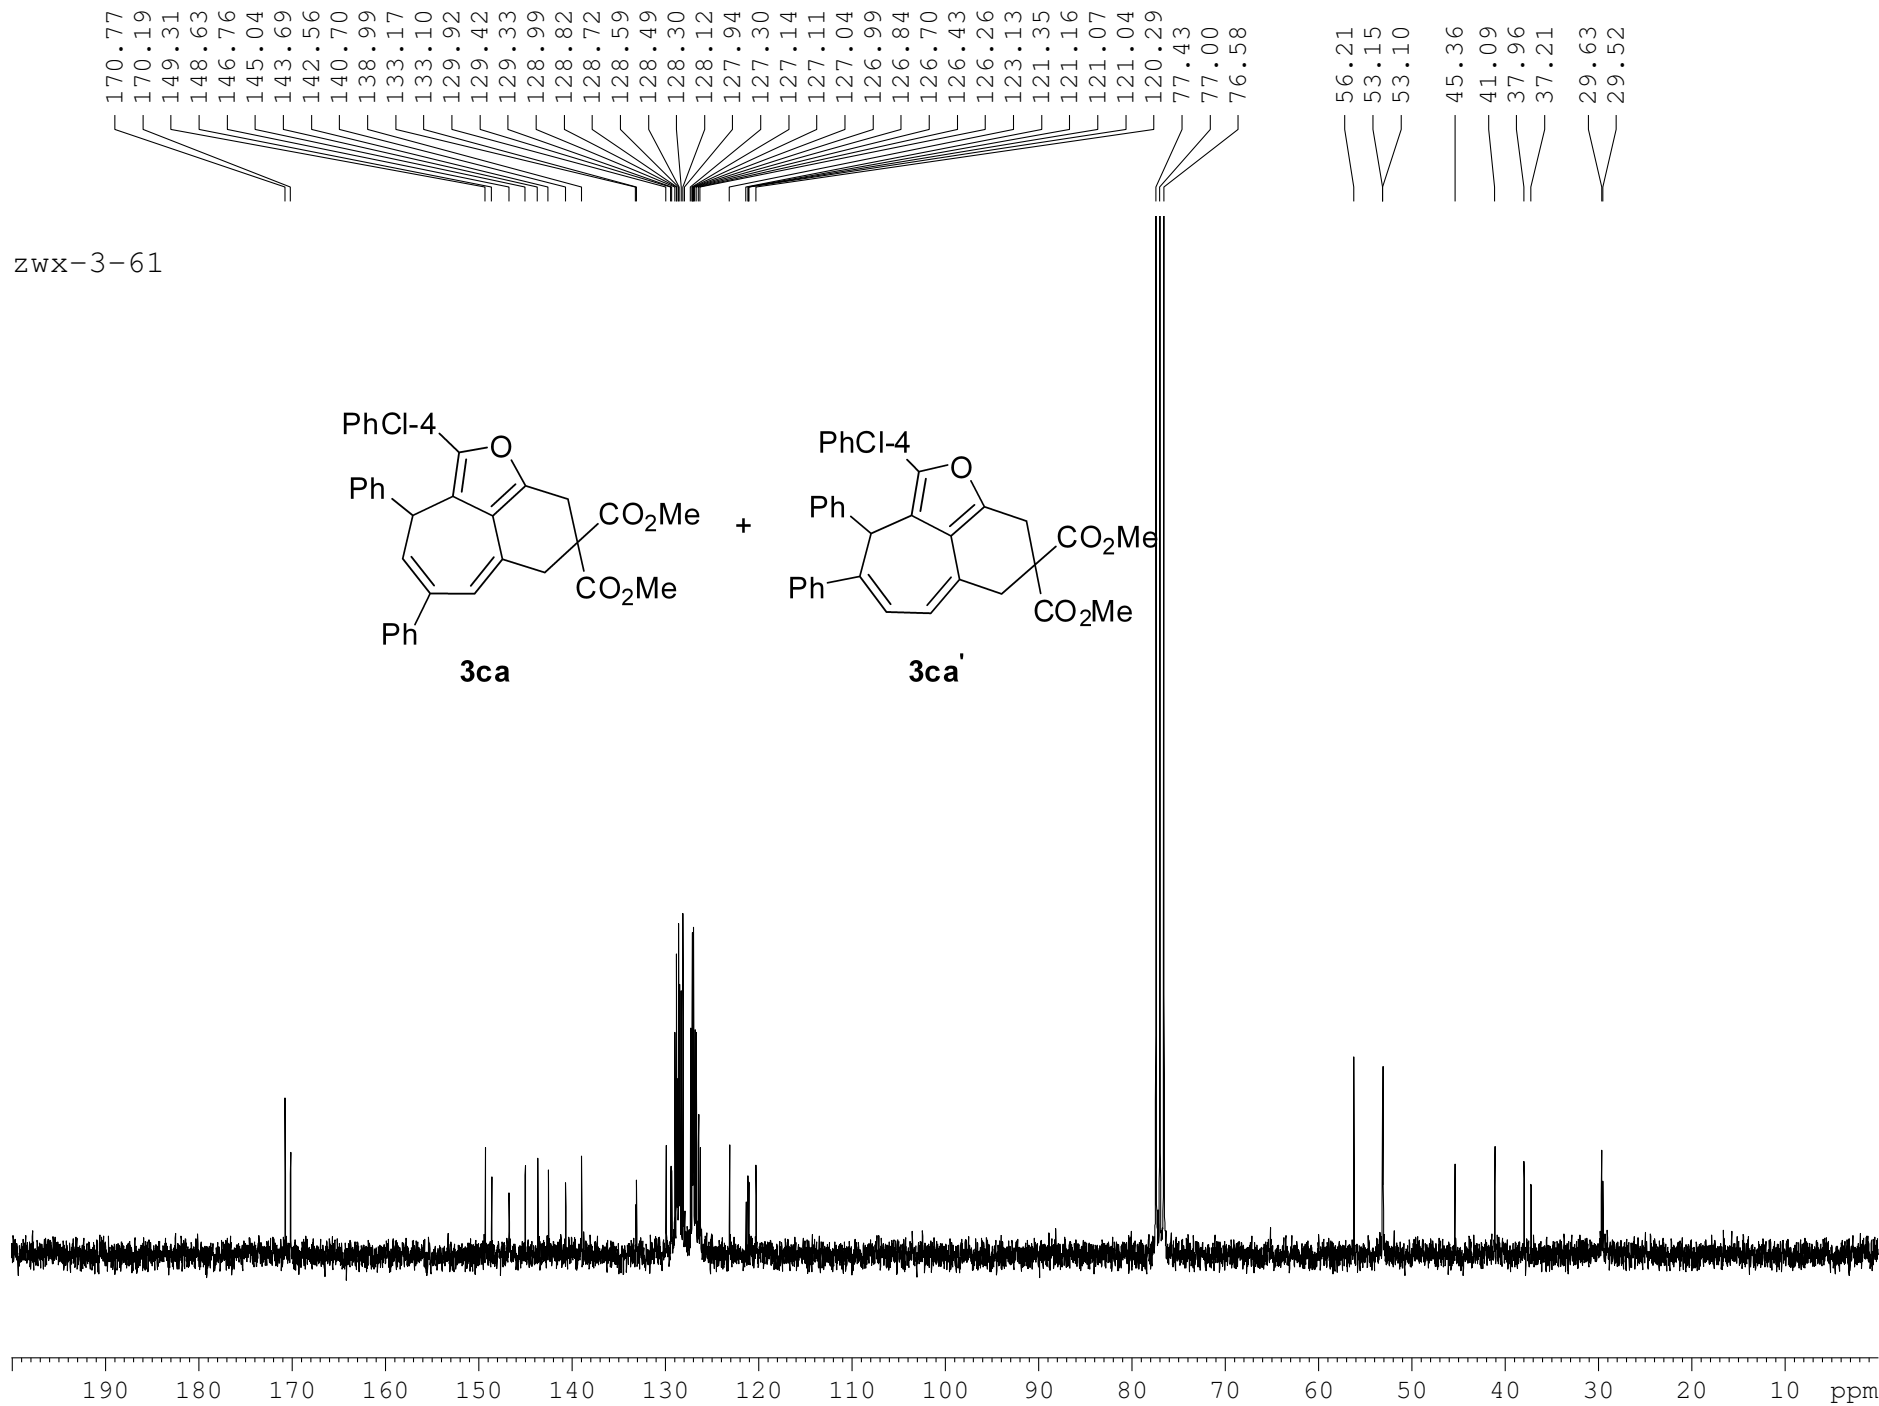



7.542  
7.516  
7.495  
7.470  
7.372  
7.349  
7.322  
7.288  
7.275  
7.259  
7.250  
7.226  
7.207  
7.178  
7.153  
7.124  
7.096  
7.042  
7.014  
6.361  
6.337  
6.168  
6.139  
5.960  
5.844  
5.819  
5.584  
5.160  
5.131  
3.898  
3.762  
3.745  
3.717  
3.706  
3.673  
3.616  
3.566  
3.337  
3.281  
3.233  
3.115  
3.041

zwx-3-70

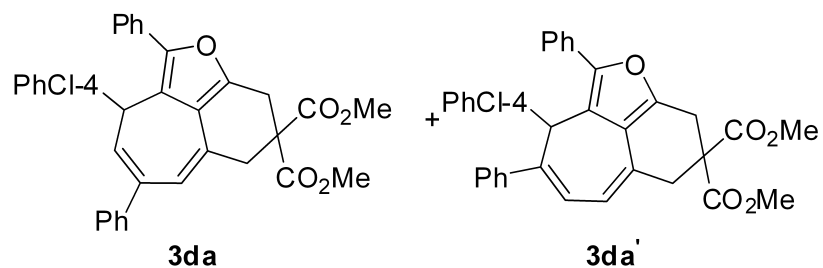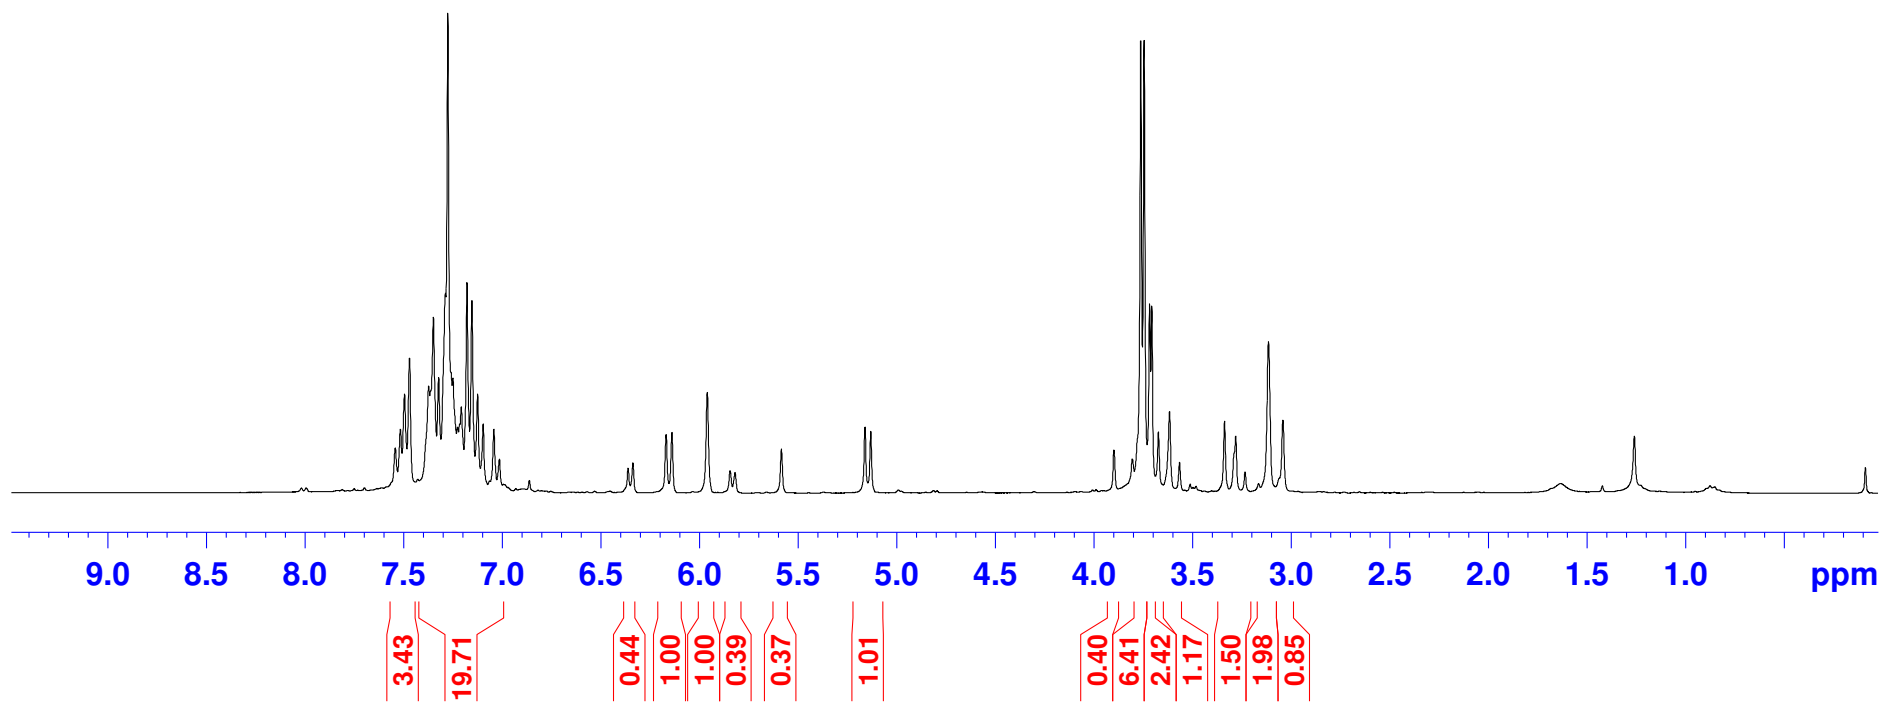

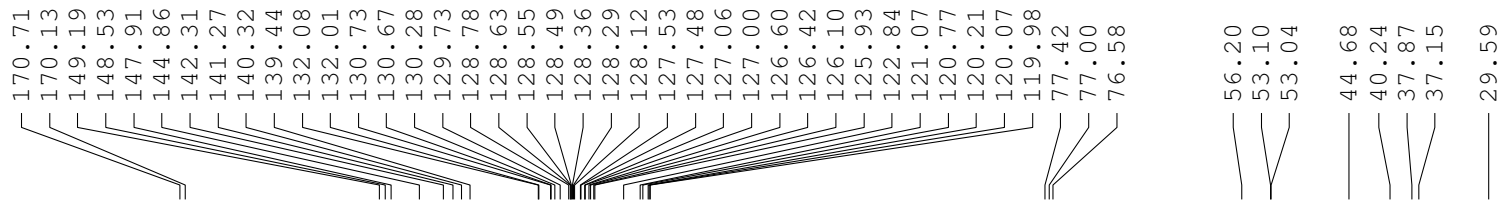

zwx-3-70

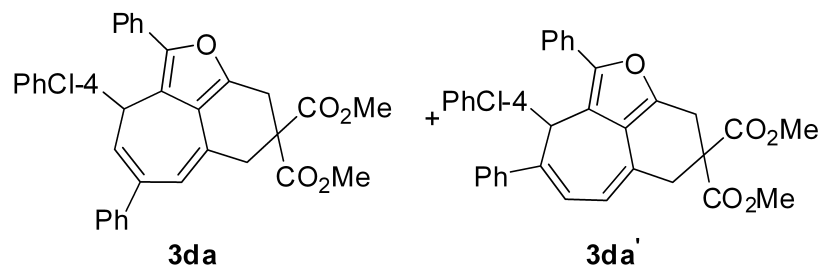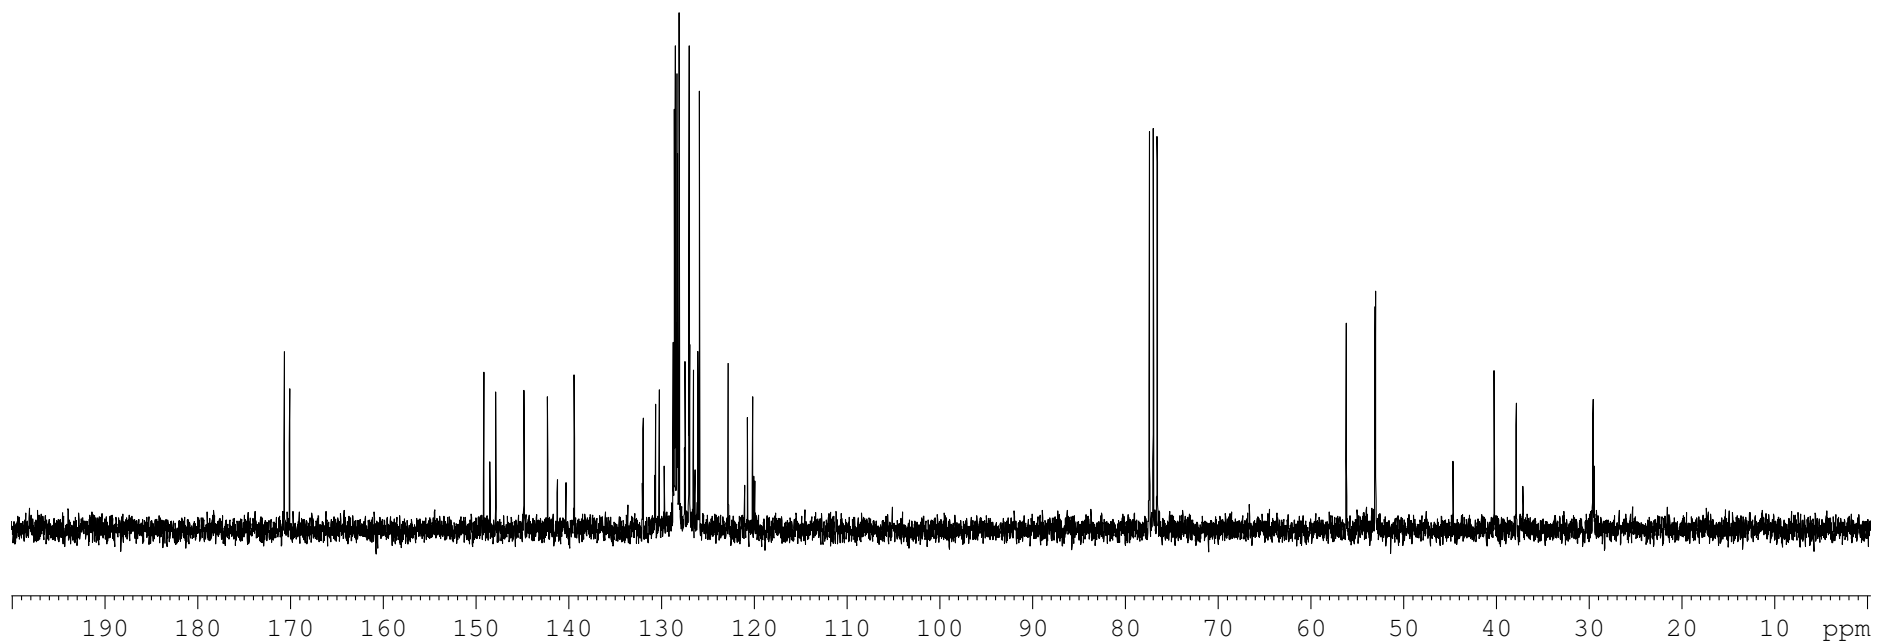

7.555  
7.530  
7.500  
7.473  
7.438  
7.347  
7.339  
7.323  
7.298  
7.276  
7.255  
7.233  
7.215  
7.190  
7.164  
7.136  
7.122  
6.321  
6.290  
6.241  
5.553  
5.105  
5.073  
3.792  
3.775  
3.707  
3.680  
3.534  
3.464  
3.418  
3.289  
3.232  
2.855  
2.726  
2.680  
2.303  
2.277  
2.257  
1.746  
1.727  
1.700  
0.881  
0.856  
0.832  
0.780  
0.757  
0.733  
0.666  
0.644  
0.623  
0.609  
0.588  
0.512  
0.492  
0.470

zwx-3-87

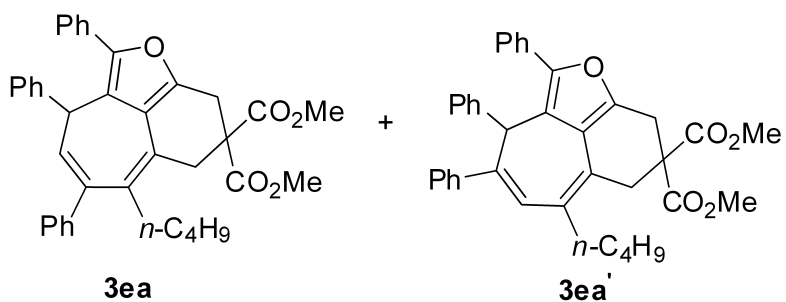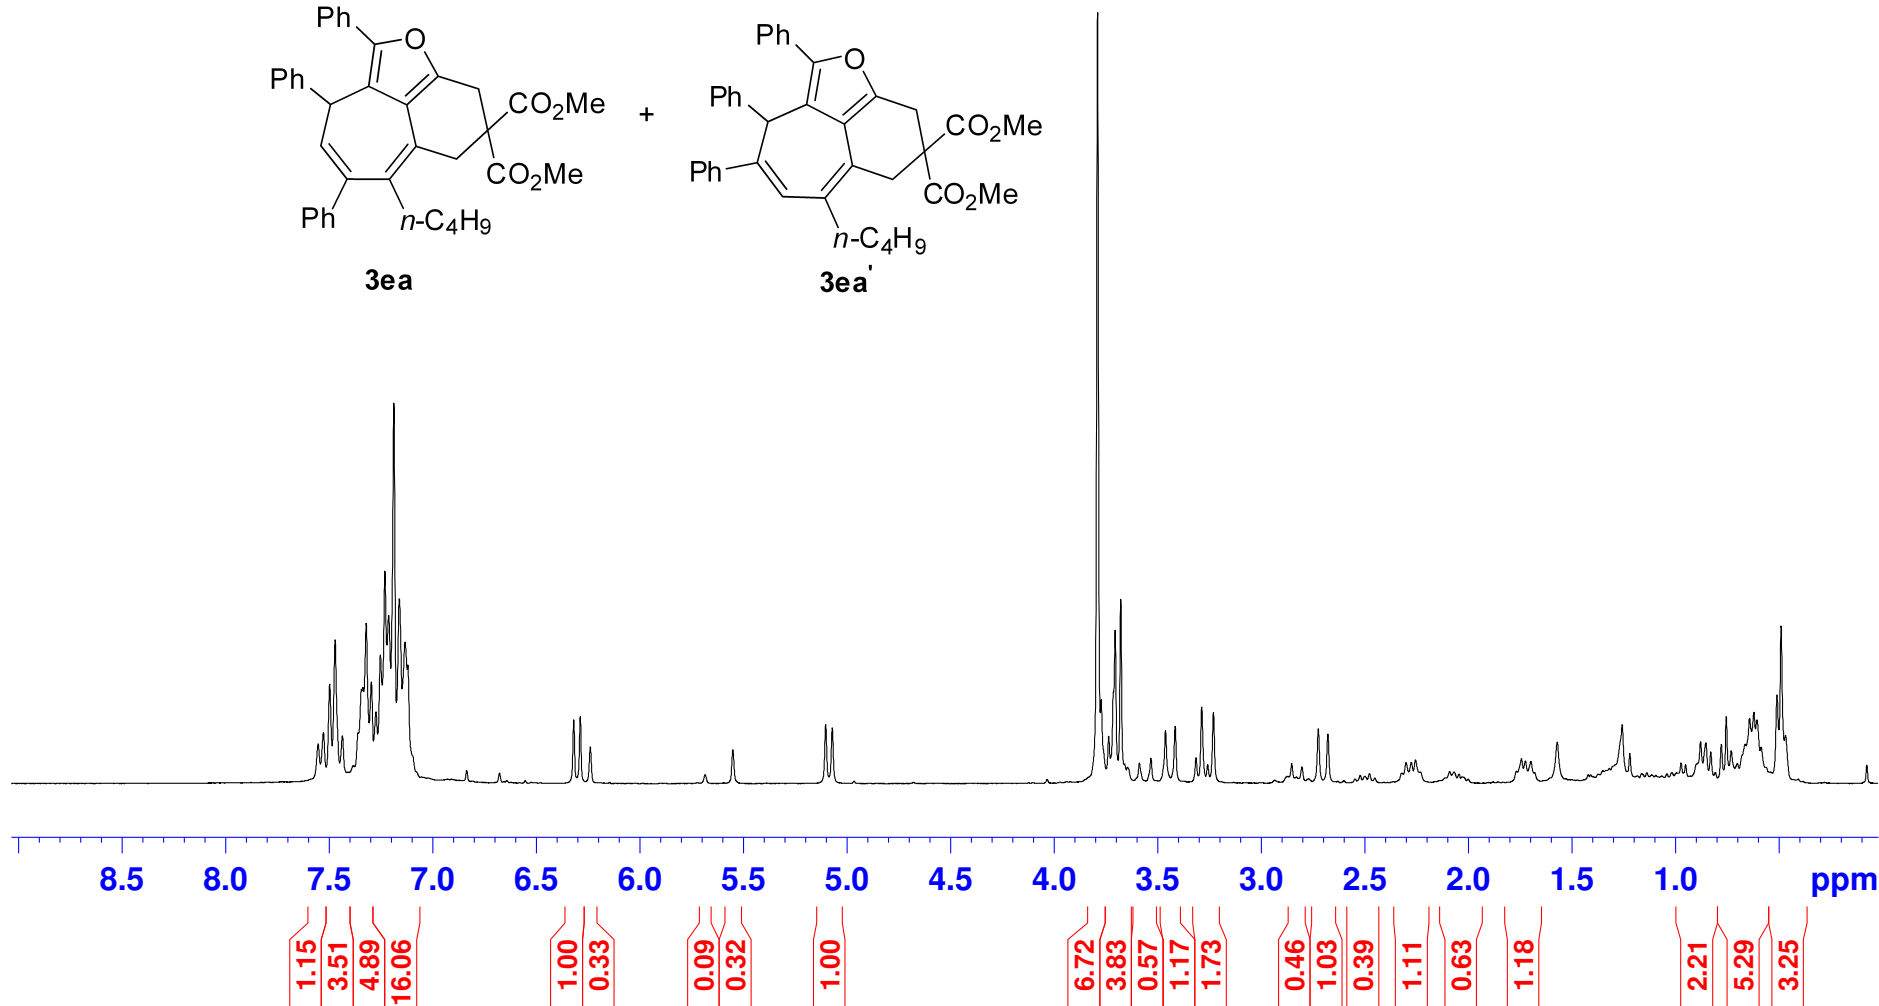

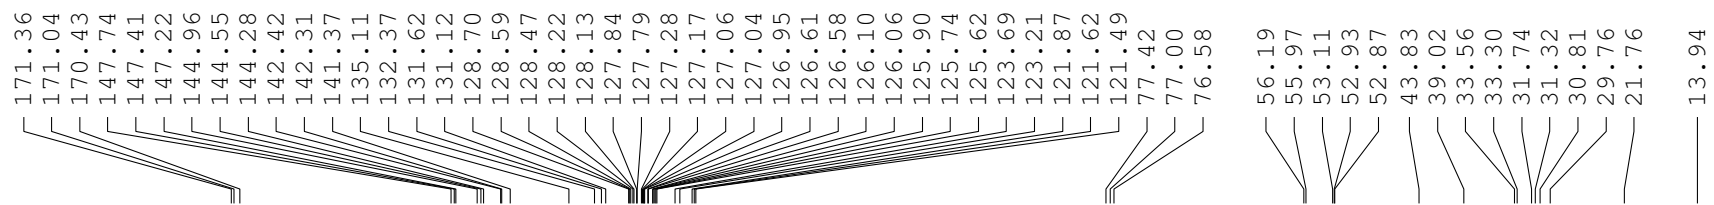

zwx-3-87

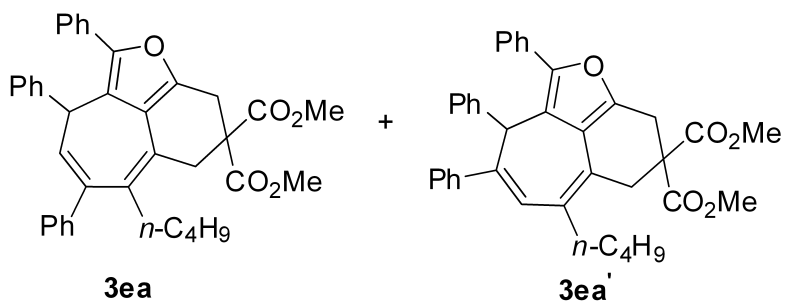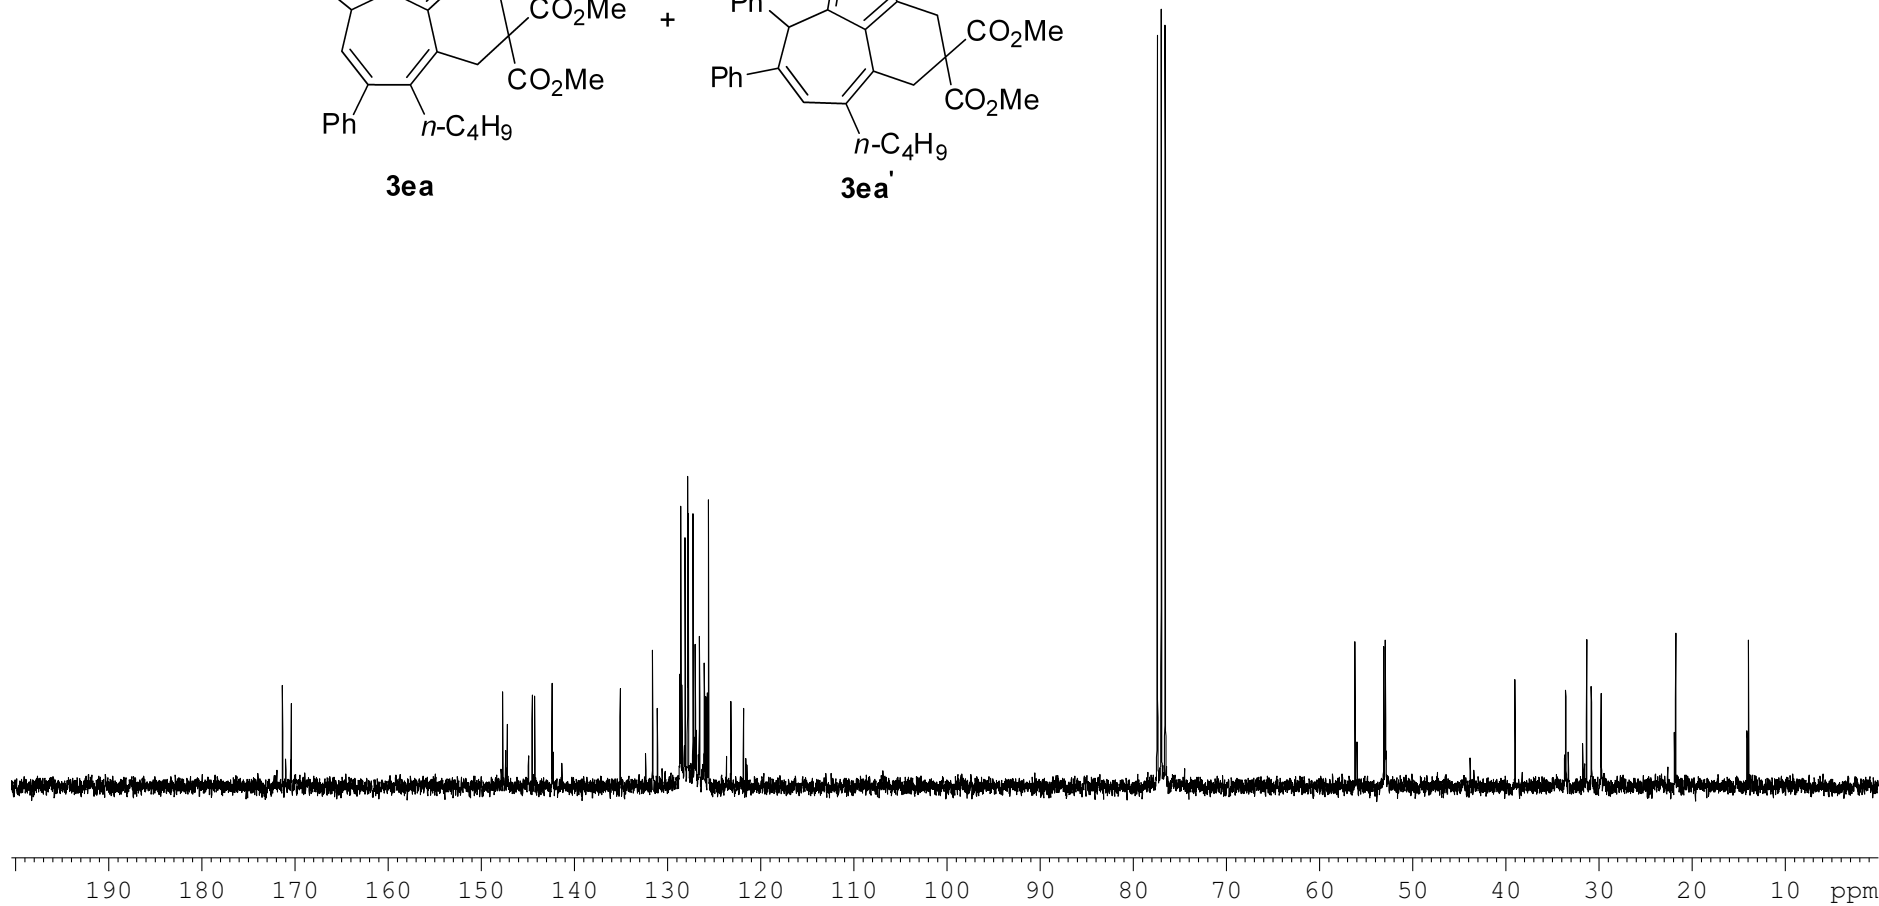

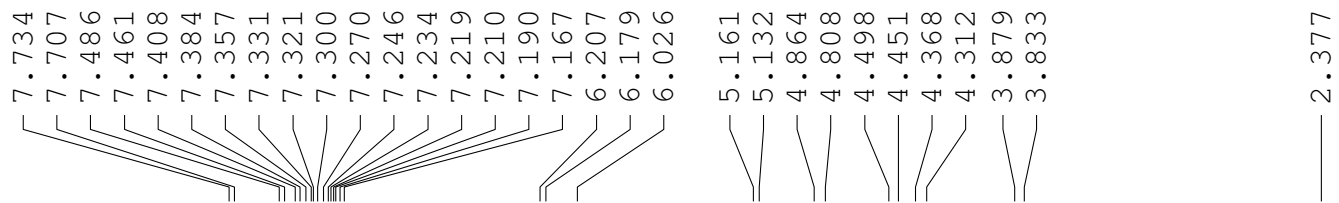

zwx-3-62-2

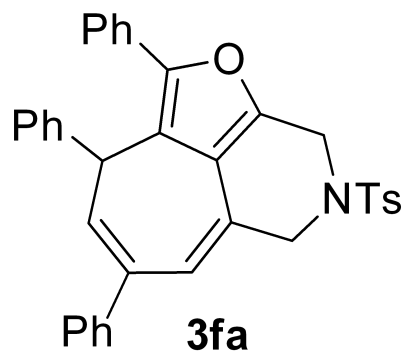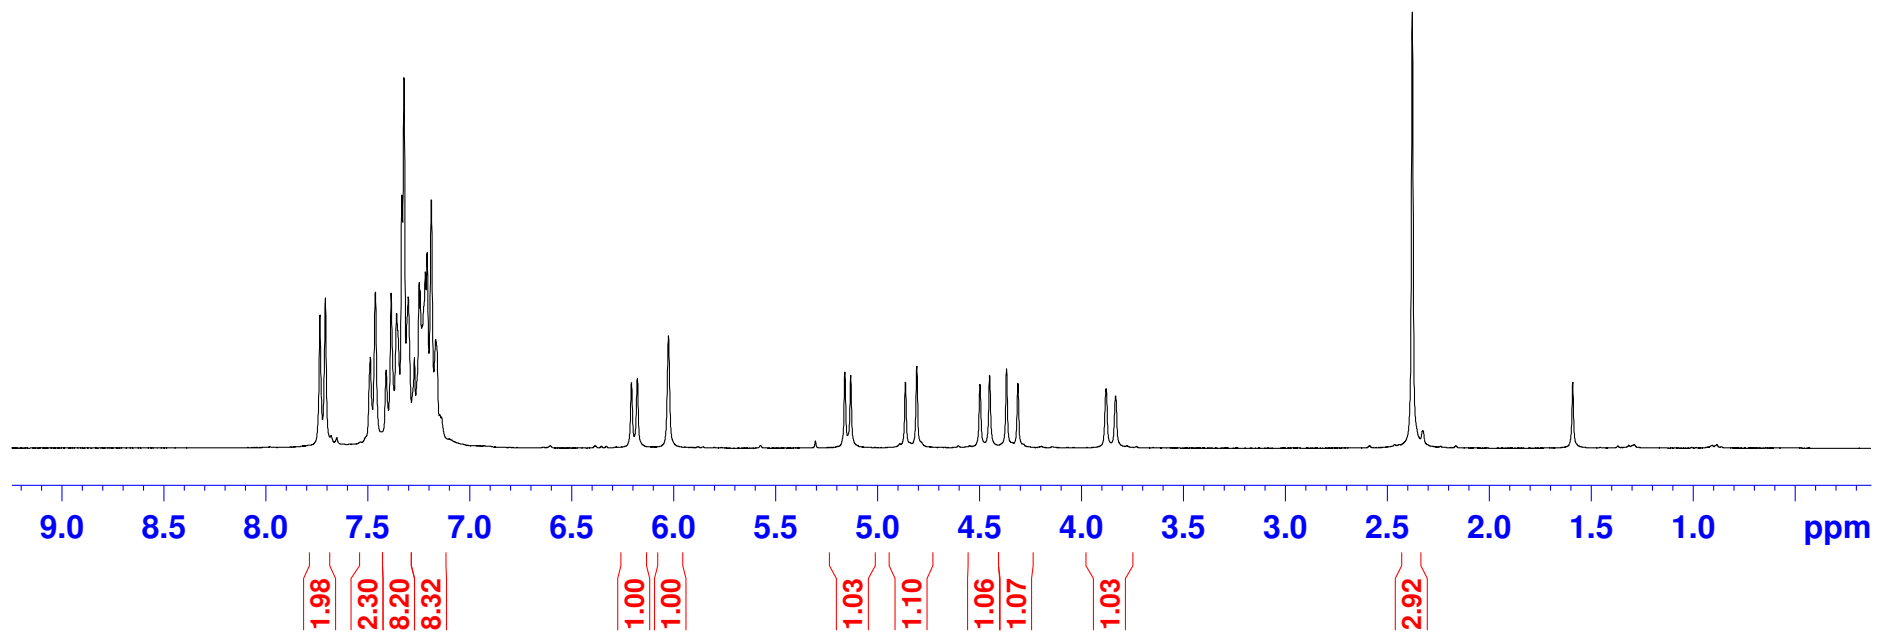

zwx-3-62-2C

148.23  
145.98  
144.74  
143.74  
138.34  
134.12  
130.41  
129.95  
129.54  
128.68  
128.62  
128.24  
128.05  
127.71  
127.49  
127.10  
127.04  
126.93  
126.46  
125.98  
122.23  
120.62  
120.33

77.42  
77.00  
76.58

50.02  
43.84  
41.31

21.50

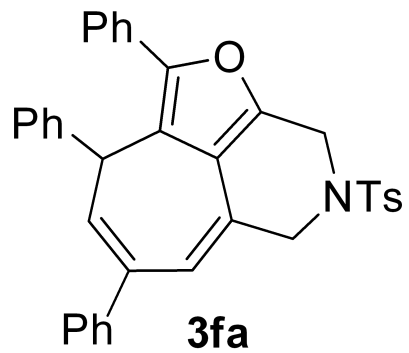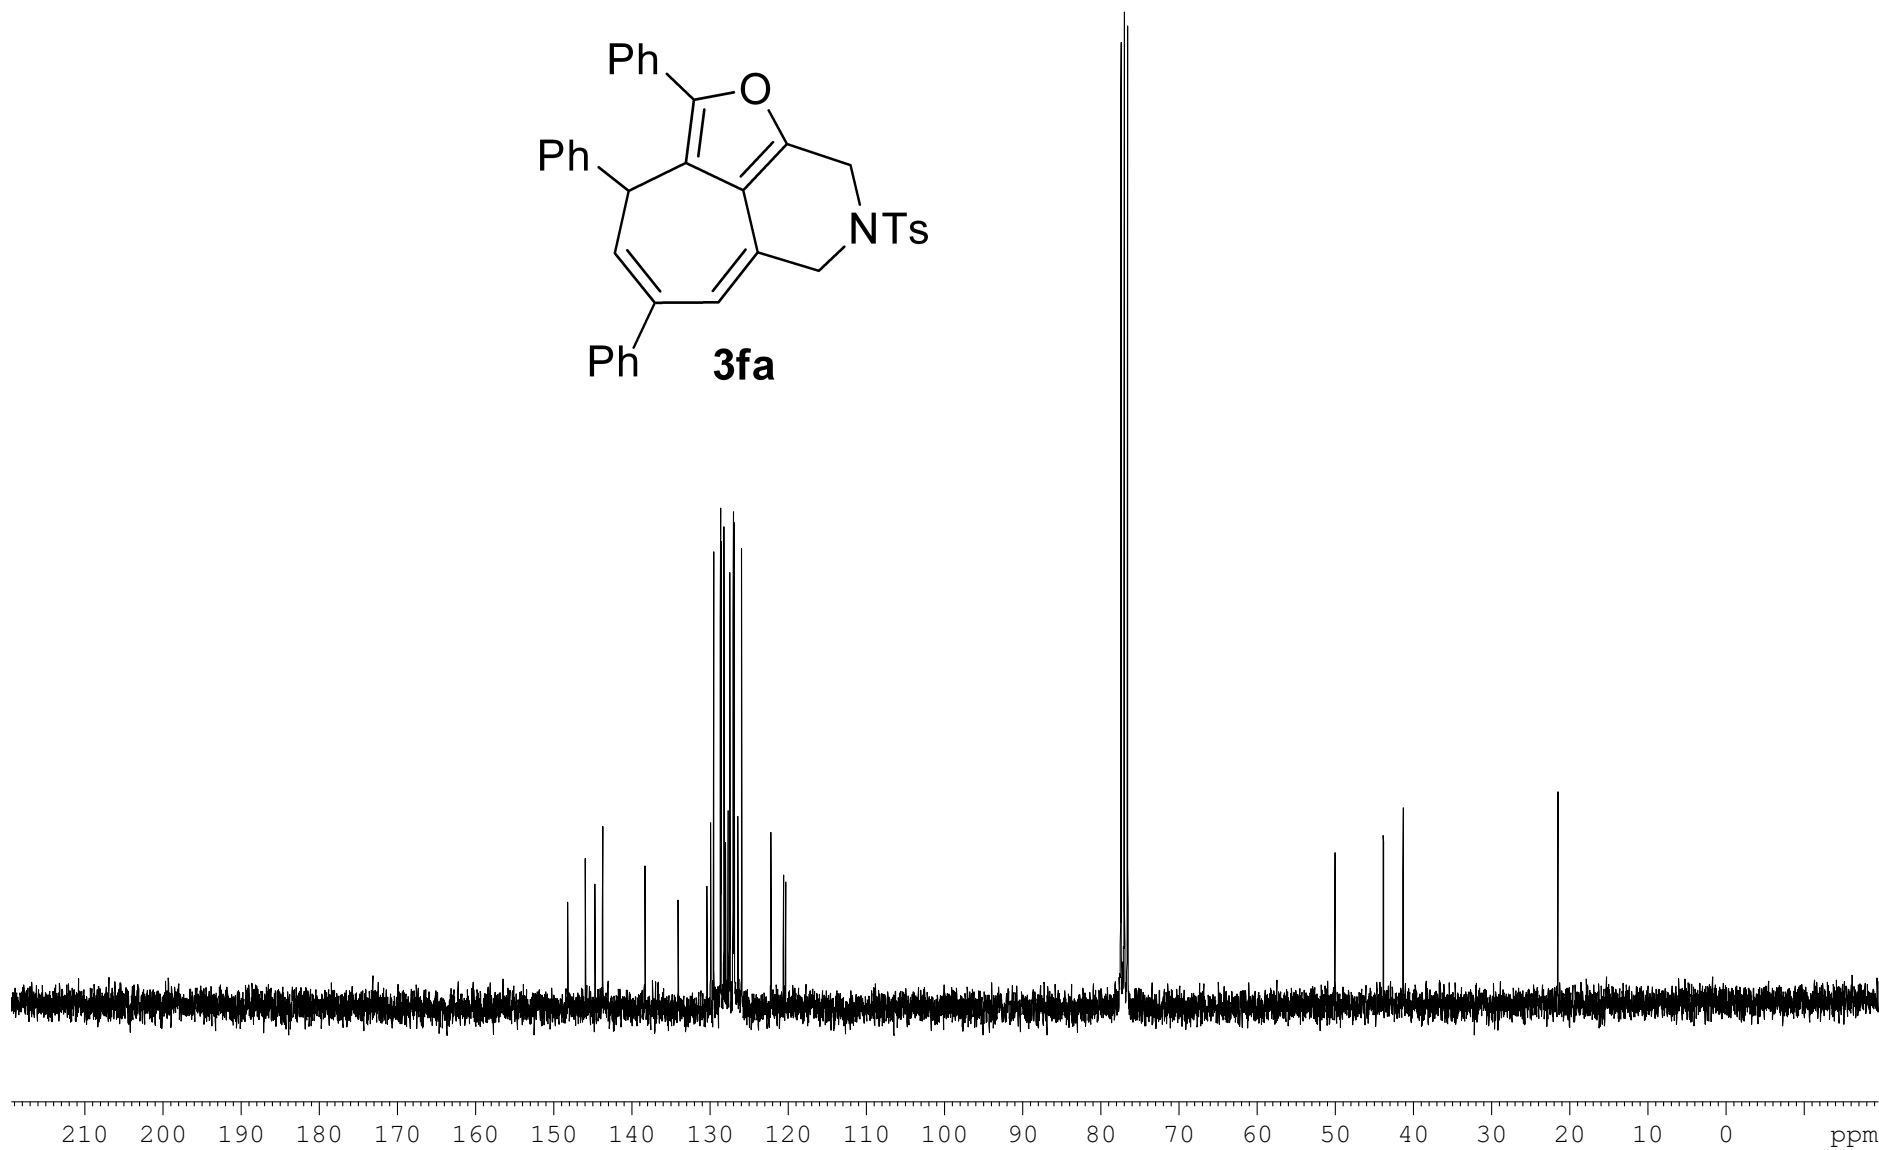

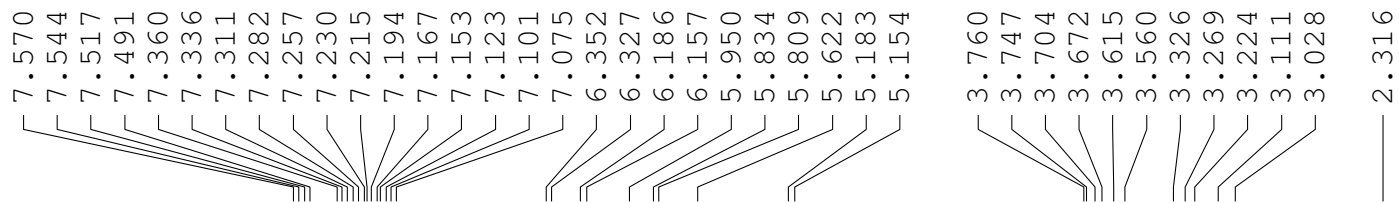

zwx-3-54

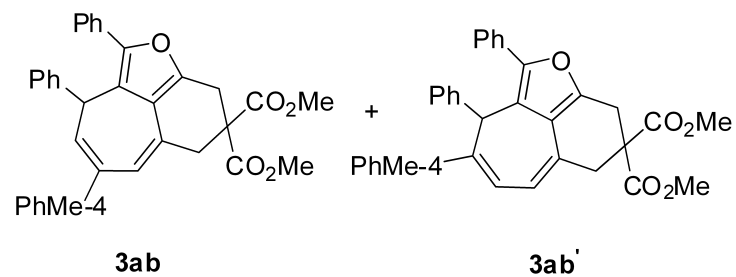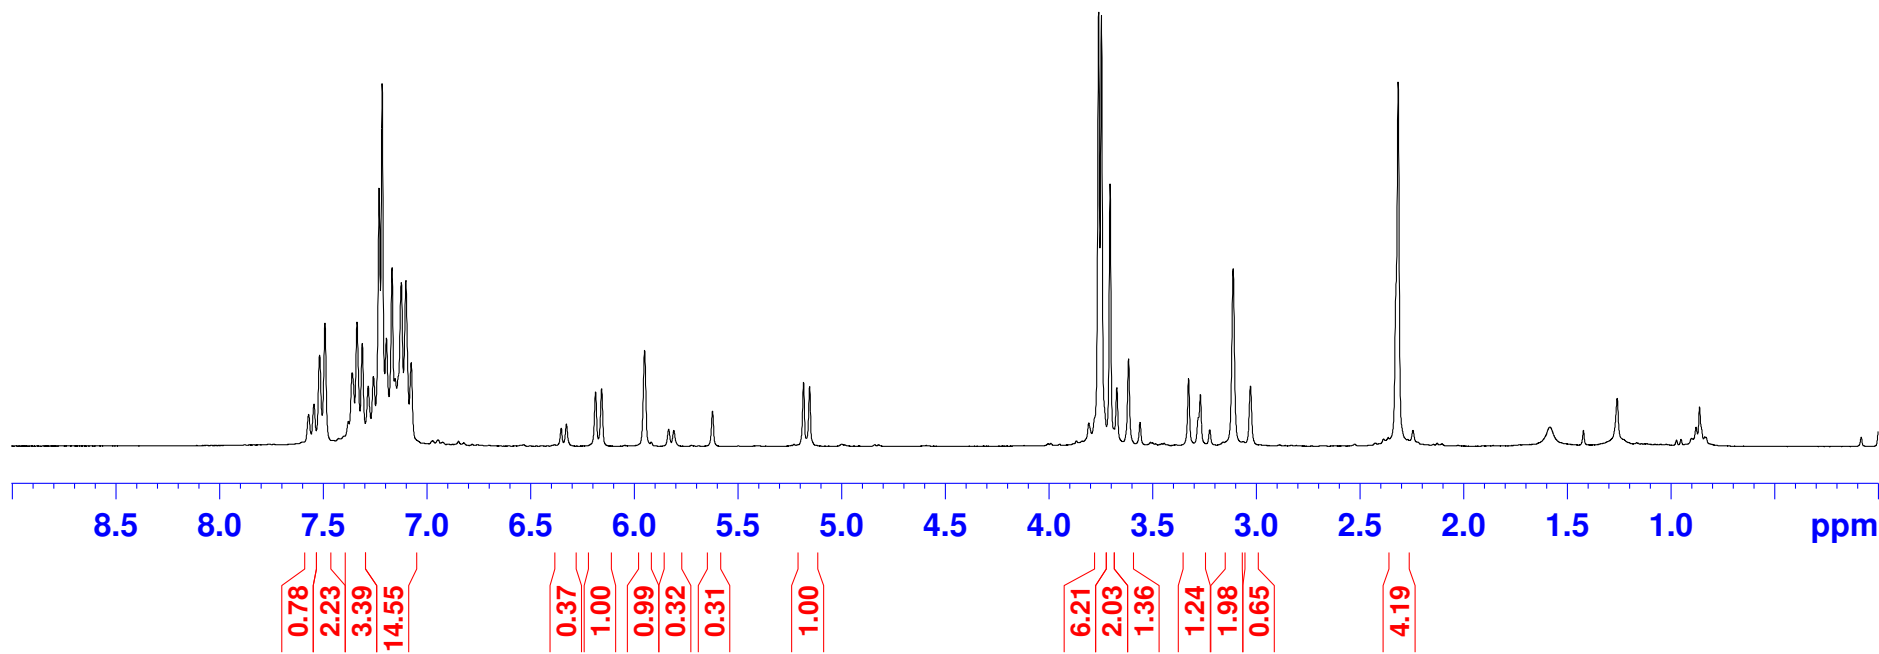

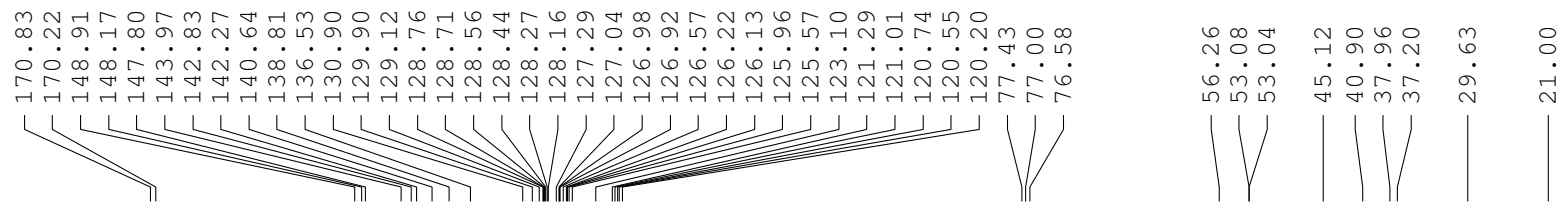

zwx-3-54

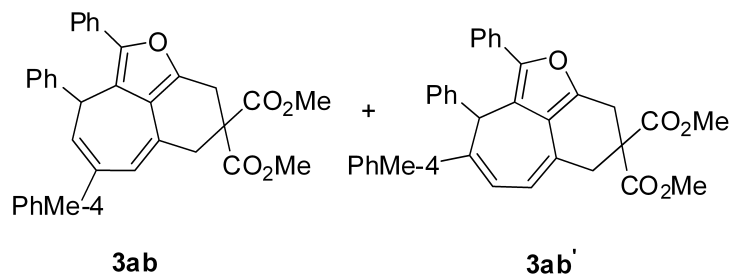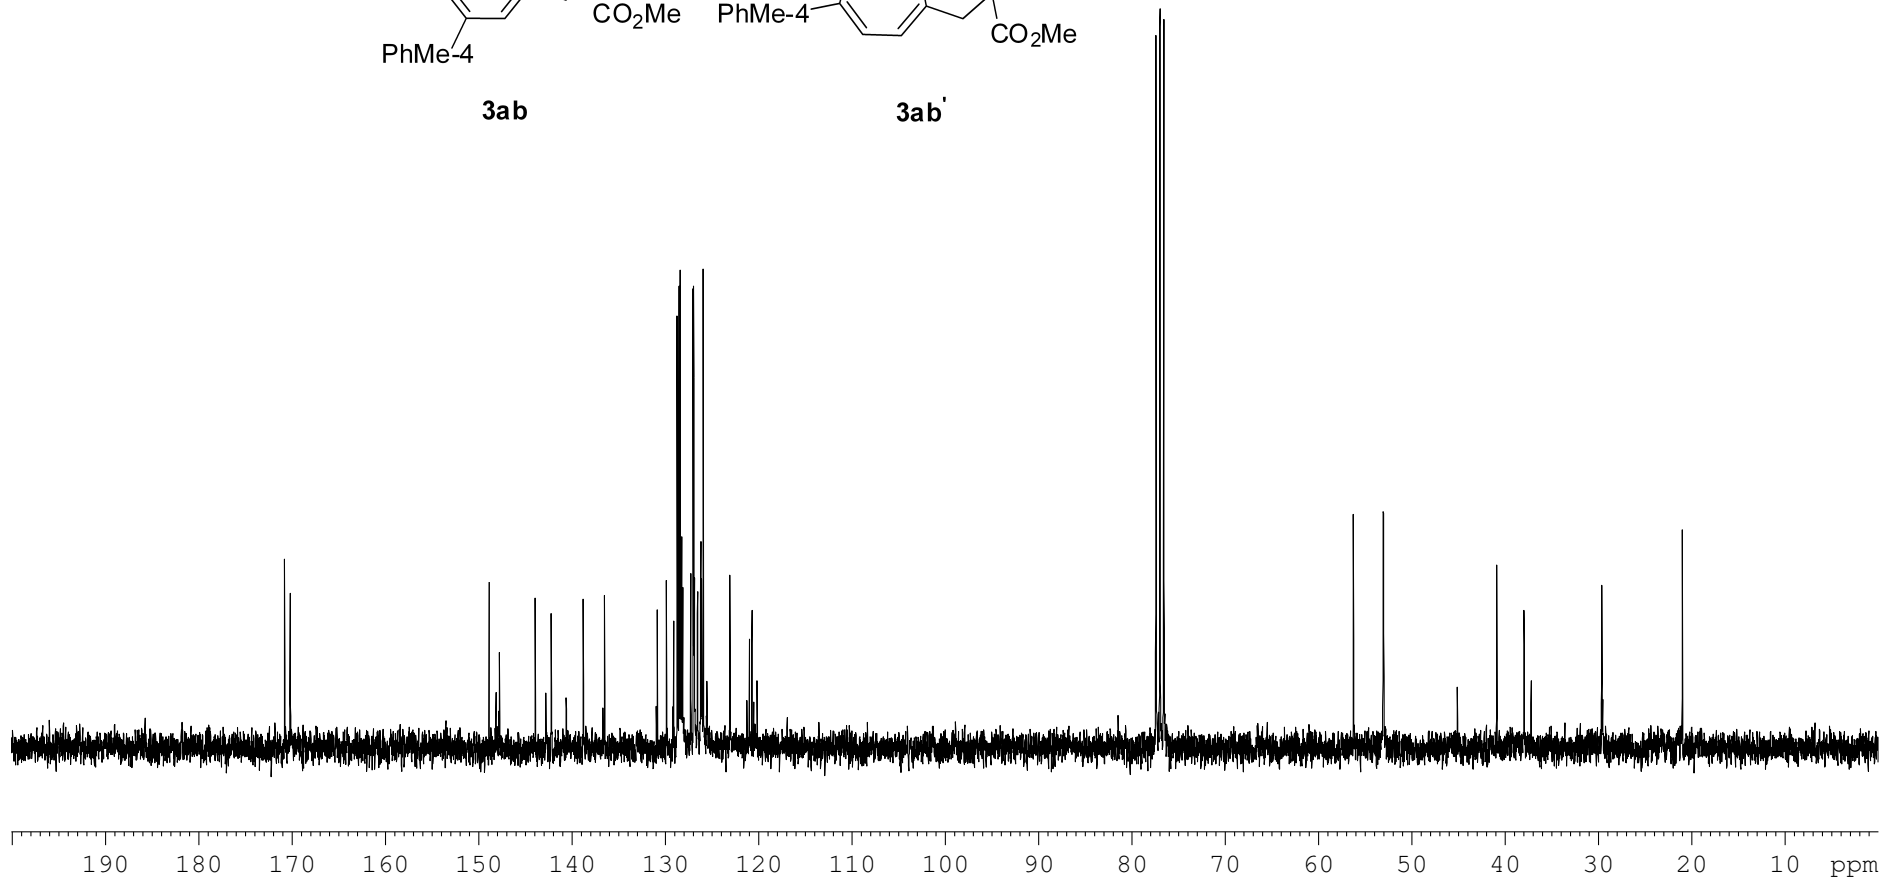



7.519  
7.492  
7.353  
7.329  
7.304  
7.247  
7.229  
7.214  
7.162  
7.148  
7.132  
6.830  
6.802  
6.317  
6.293  
6.165  
6.136  
5.949  
5.831  
5.806  
5.612  
5.183  
5.154  
3.750  
3.693  
3.674  
3.617  
3.329  
3.273  
3.111  
3.026

zwx-3-35-2

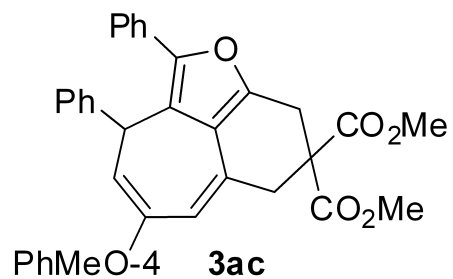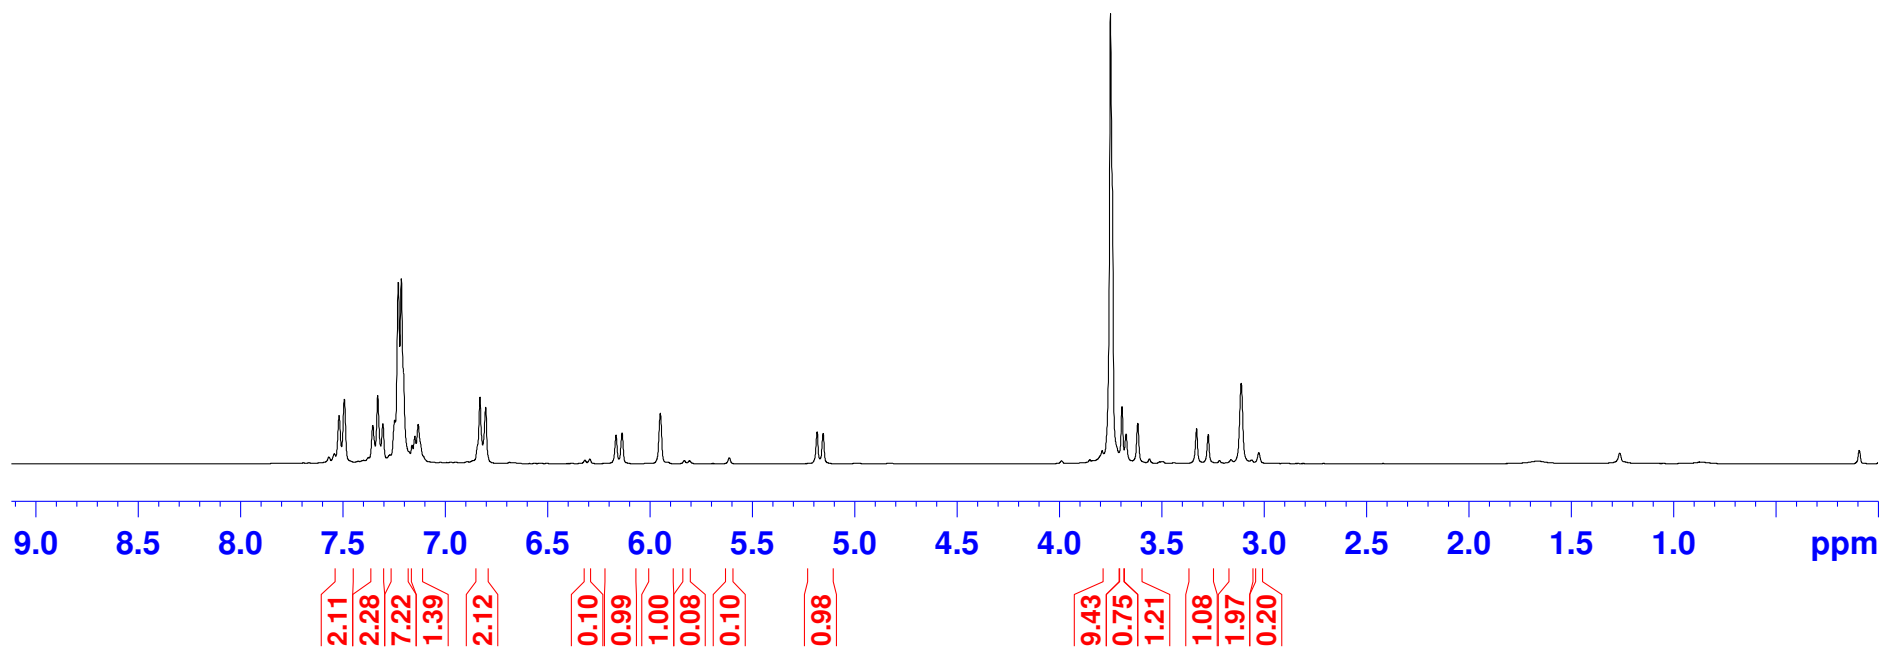

zwx-3-35-2

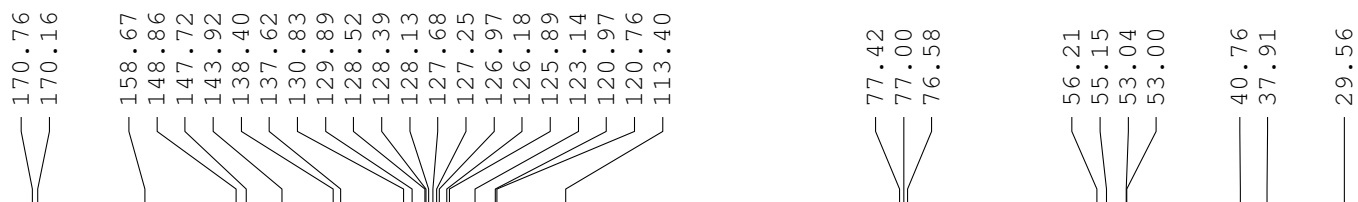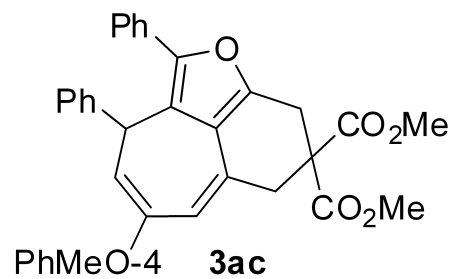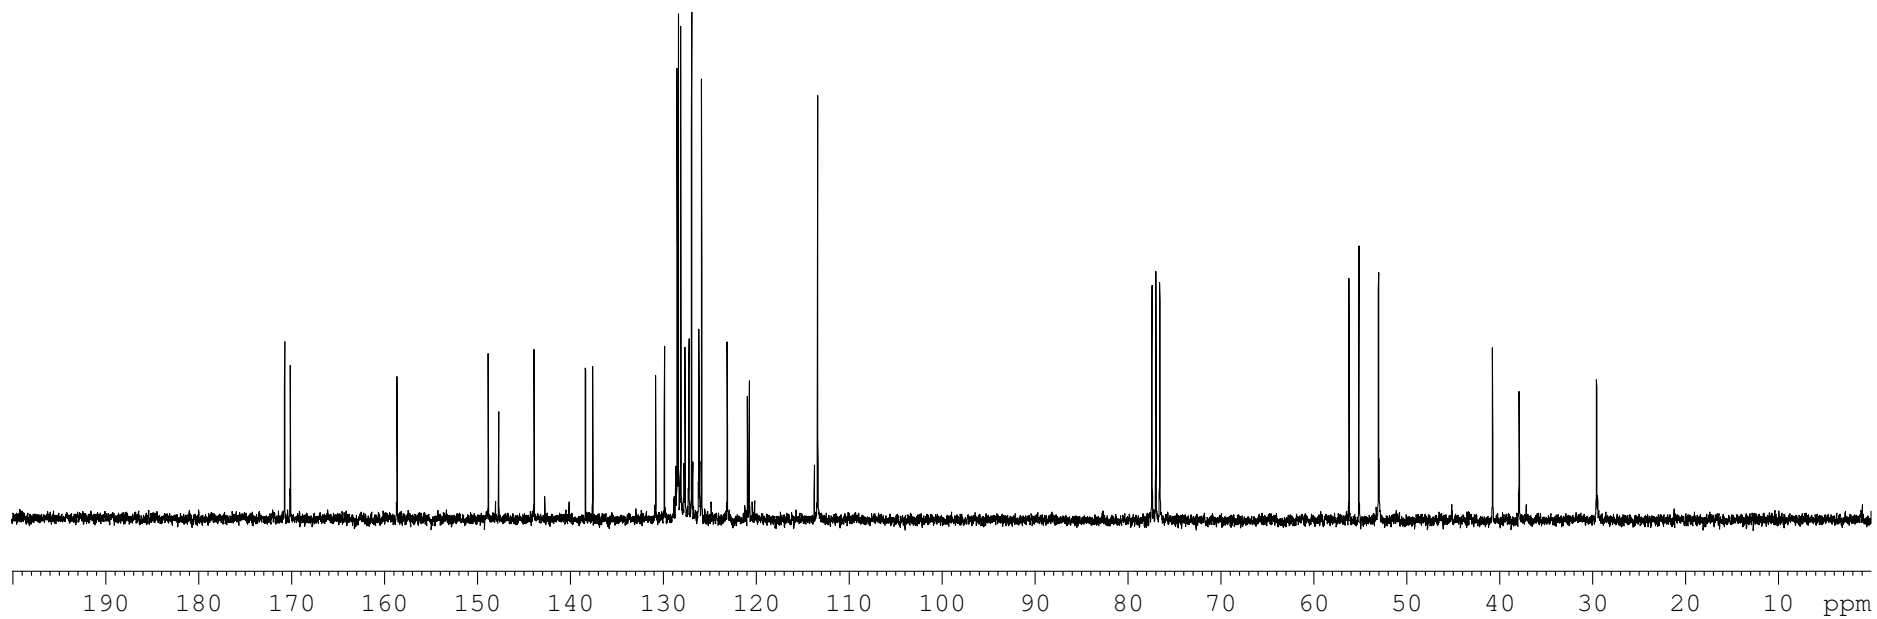

7.524  
7.498  
7.377  
7.352  
7.327  
7.275  
7.236  
7.223  
7.180  
7.168  
7.153  
7.137  
6.873  
6.842  
6.807  
6.780  
6.183  
6.153  
5.964  
  
5.190  
5.161  
  
3.880  
3.862  
3.774  
3.737  
3.668  
3.611  
3.349  
3.293  
3.116

zwx-3-116

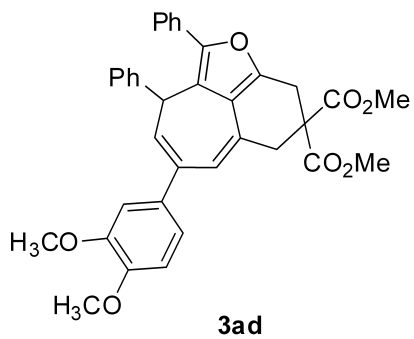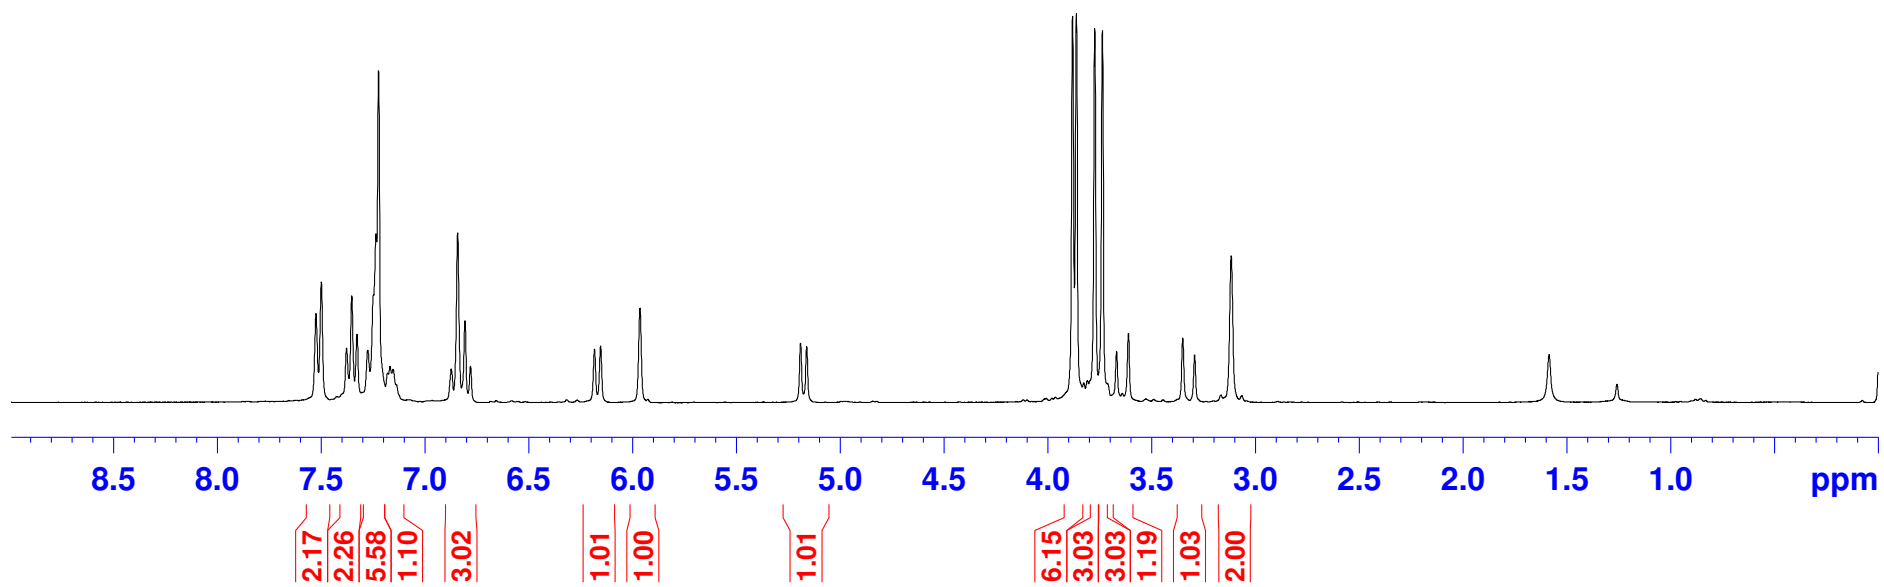

zwx-3-116

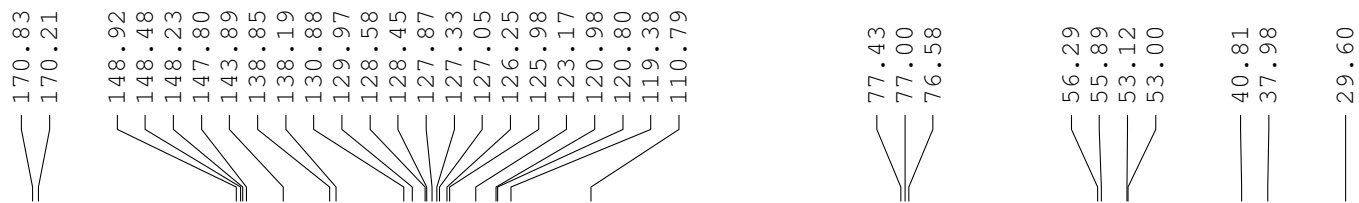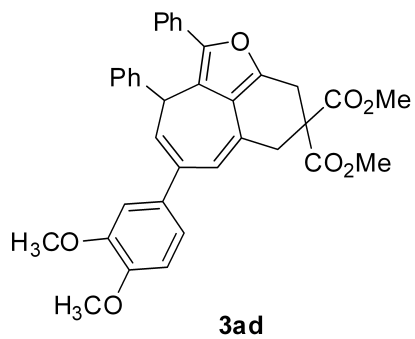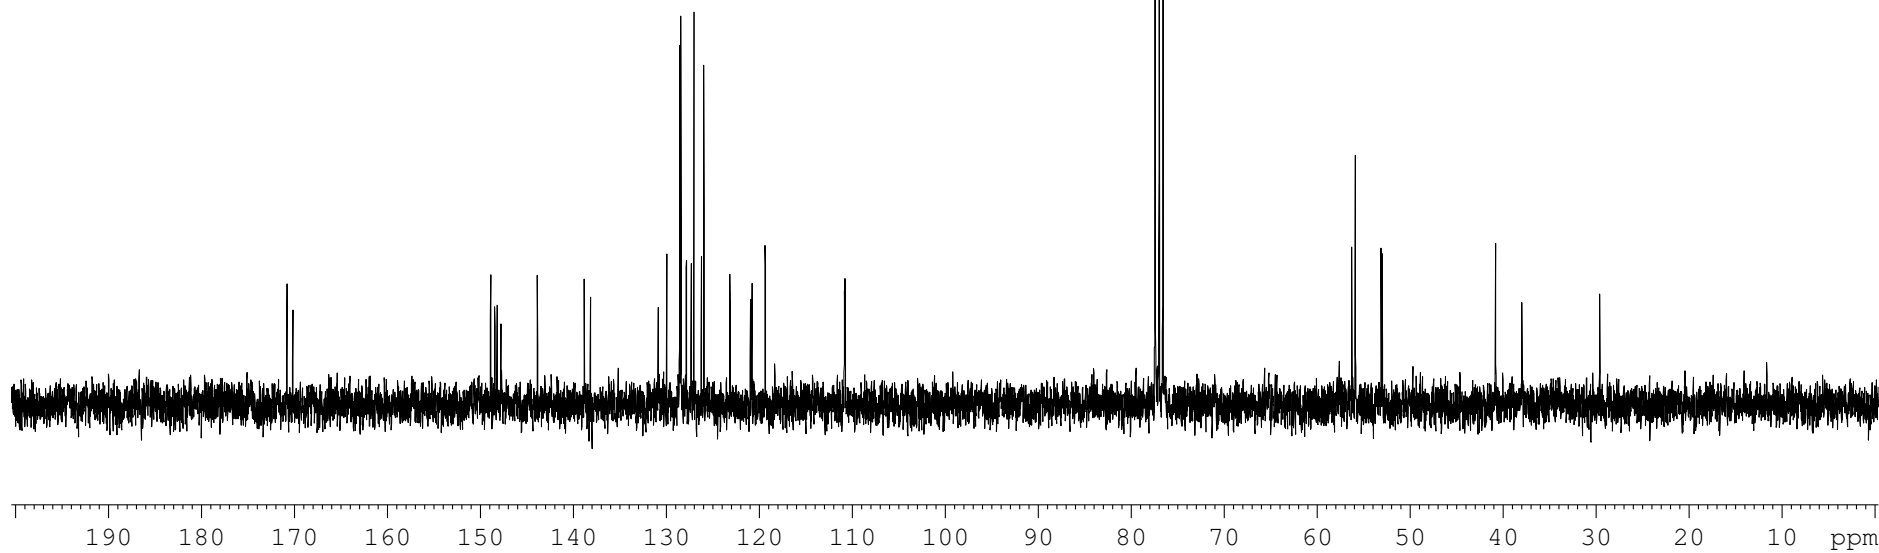

7.865  
7.801  
7.603  
7.578  
7.457  
7.432  
7.407  
7.364  
7.340  
7.317  
7.238  
7.215  
7.154  
7.130  
6.494  
6.470  
5.942  
5.918  
5.570  
  
3.777  
3.694  
3.638  
3.357  
3.300  
3.121

zwx-3-106

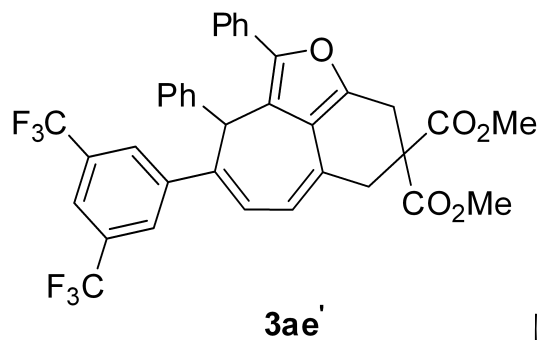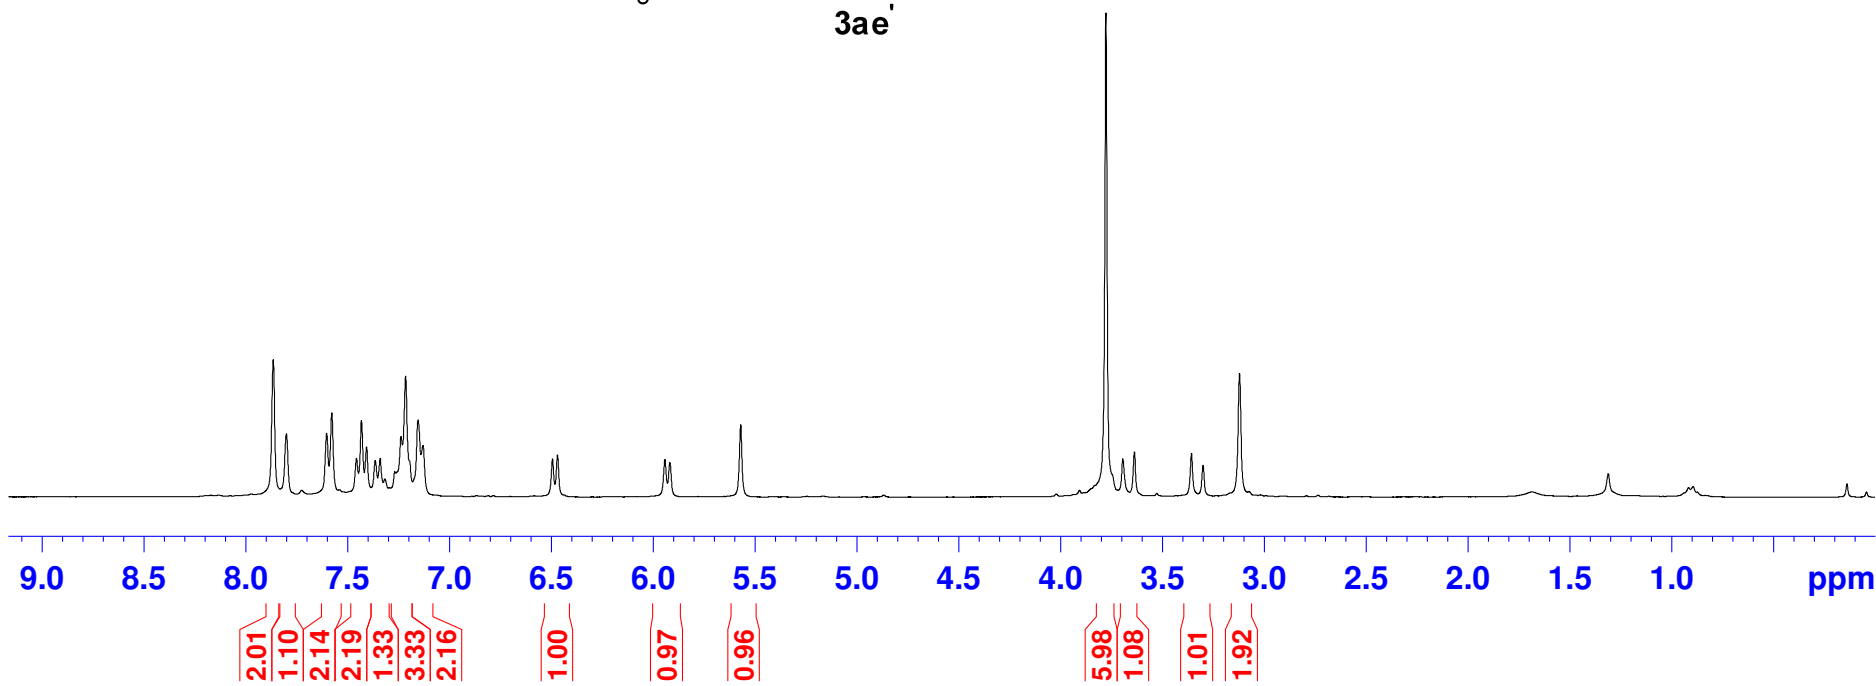

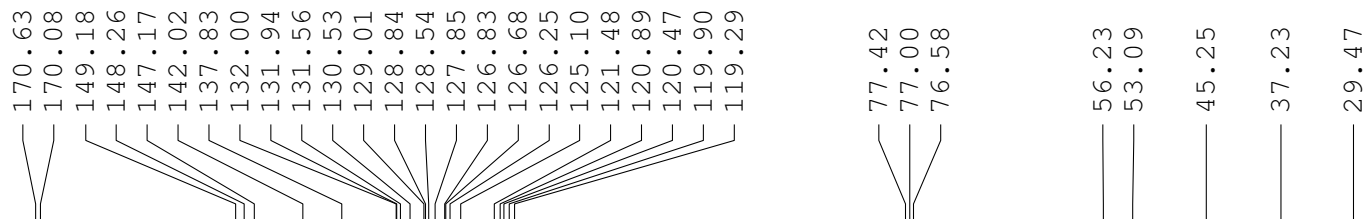

zwx-3-106

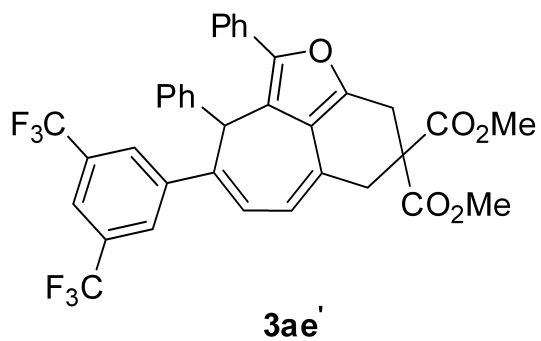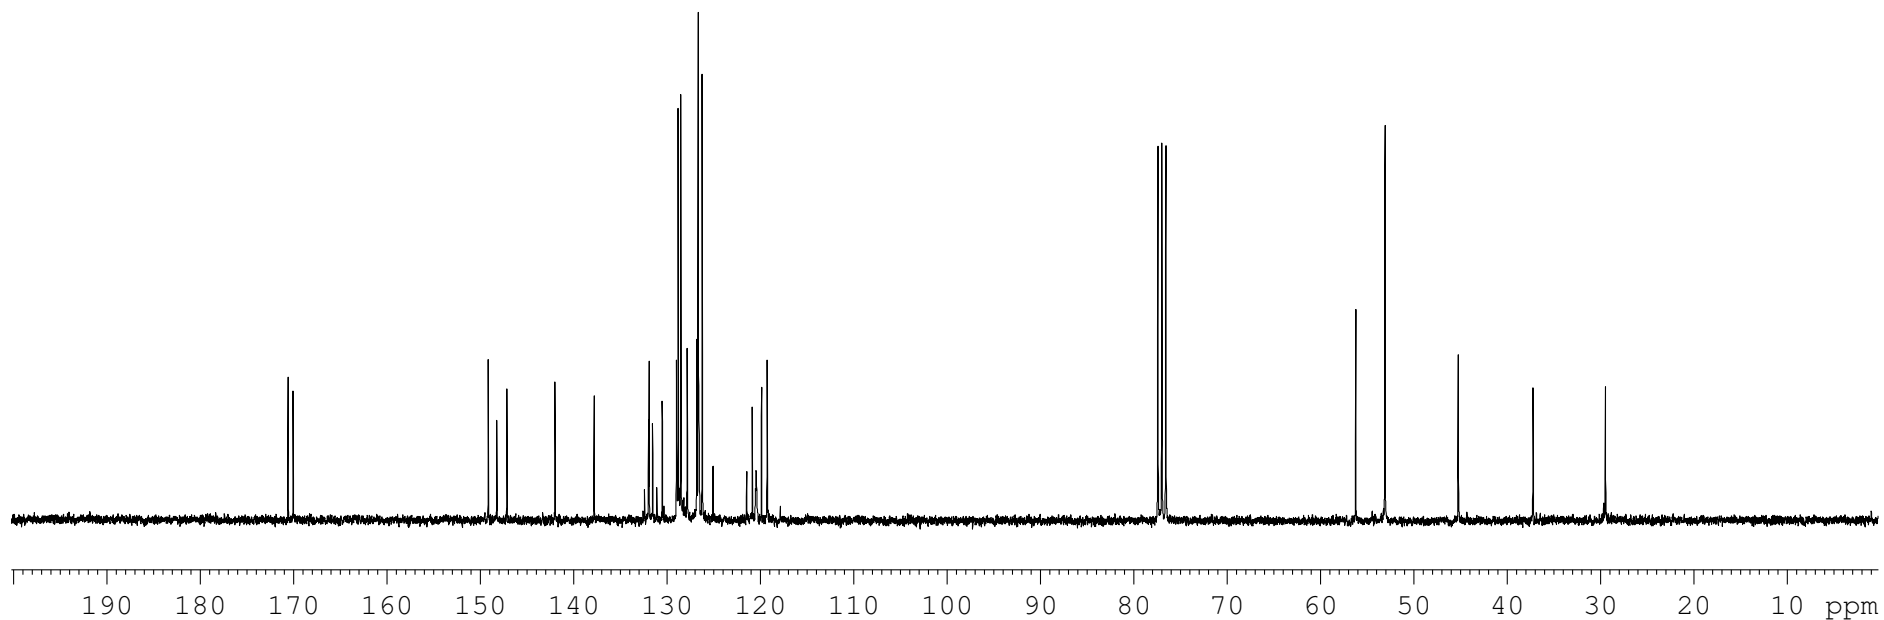

8.180  
8.151  
7.547  
7.524  
7.496  
7.422  
7.398  
7.373  
7.335  
7.311  
7.287  
7.260  
7.191  
7.171  
7.096  
7.072  
6.488  
6.463  
5.901  
5.876  
5.573  
  
3.745  
3.742  
3.647  
3.590  
3.313  
3.256  
3.075

zwx-3-43-2

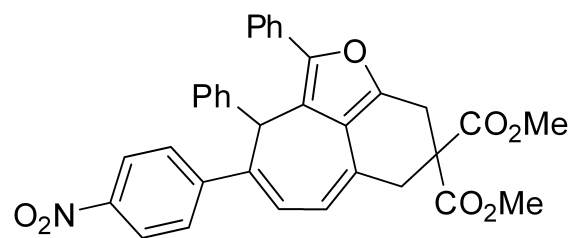

3af'

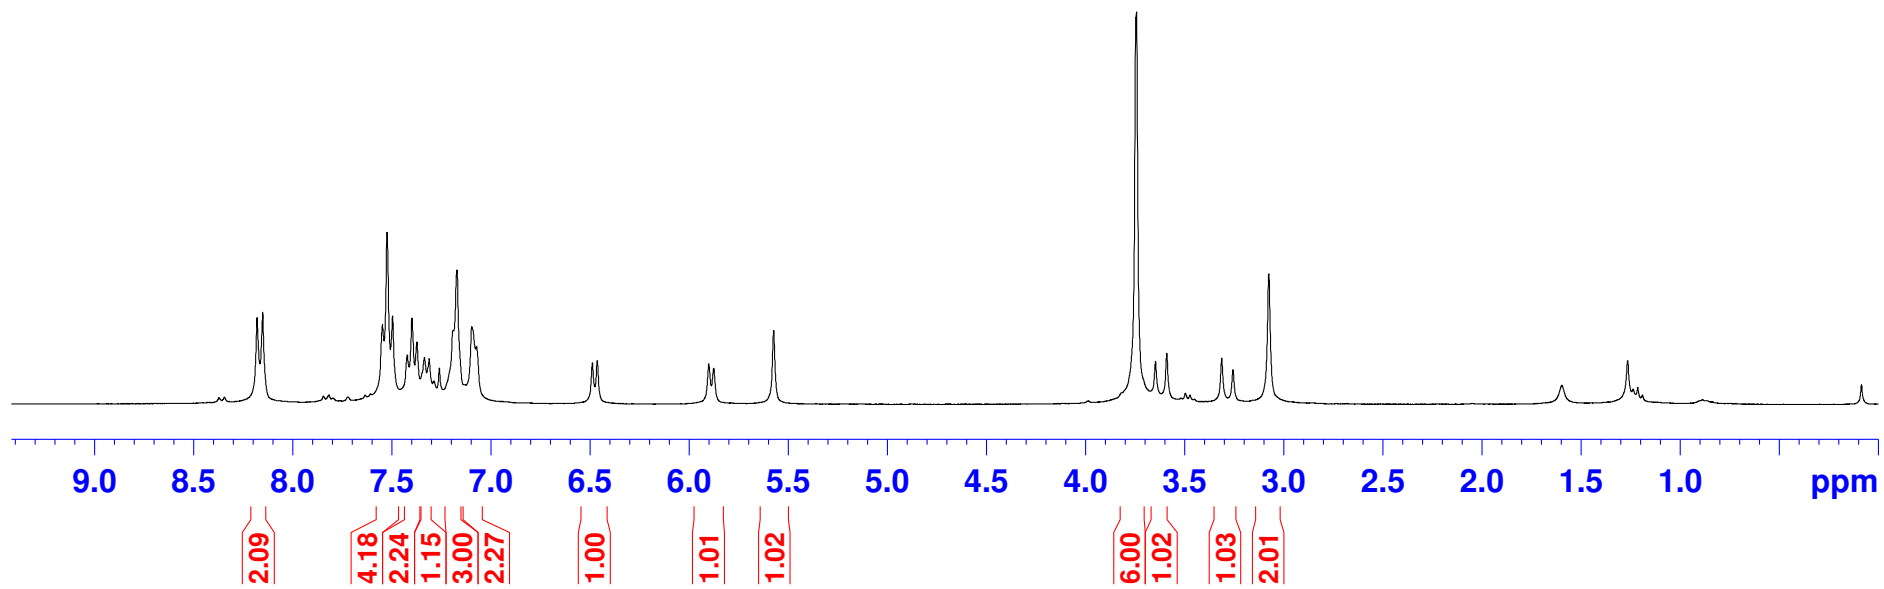

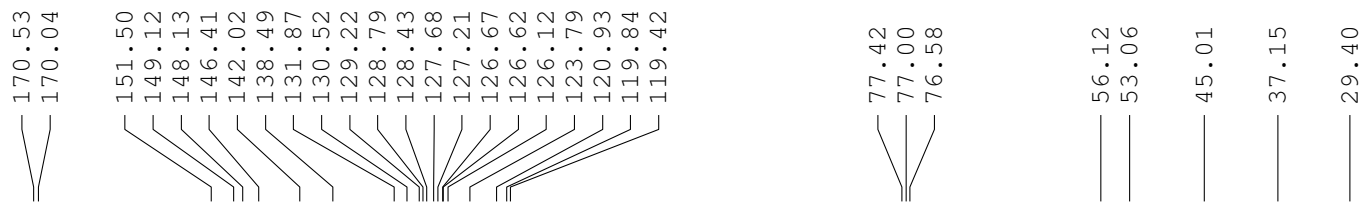

zwx-3-43-2

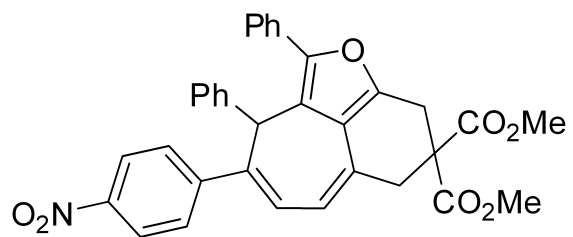

3af'

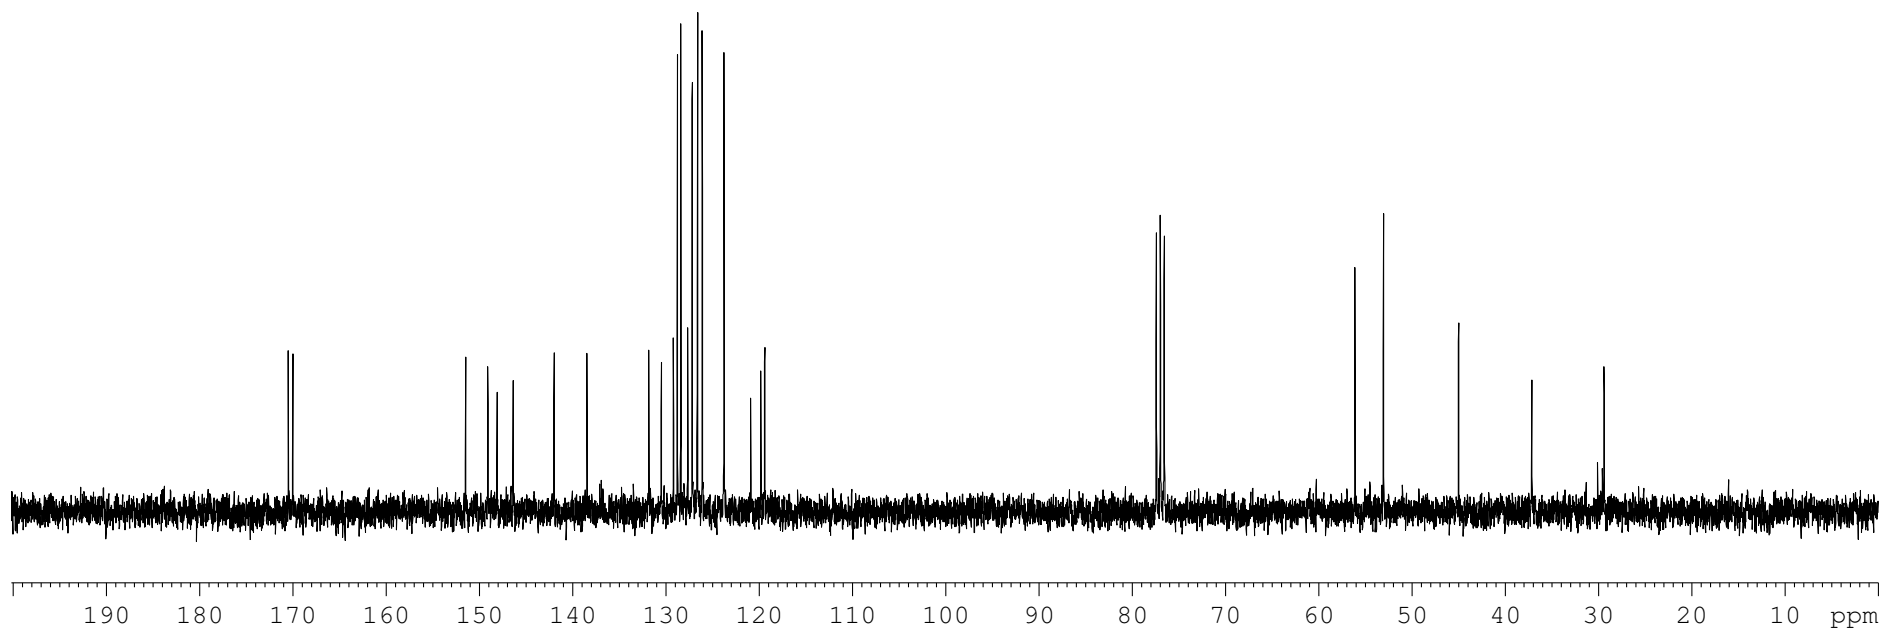



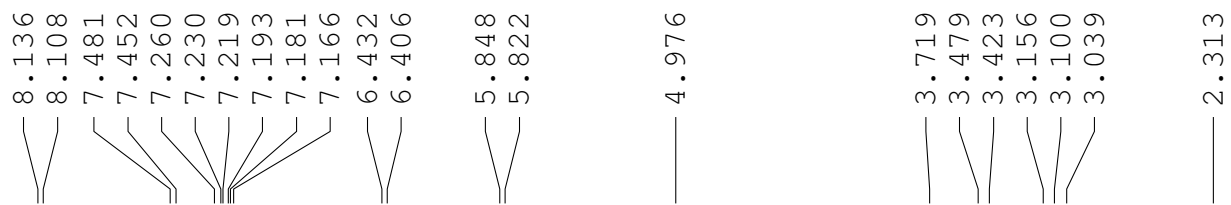

zwx-3-55-2

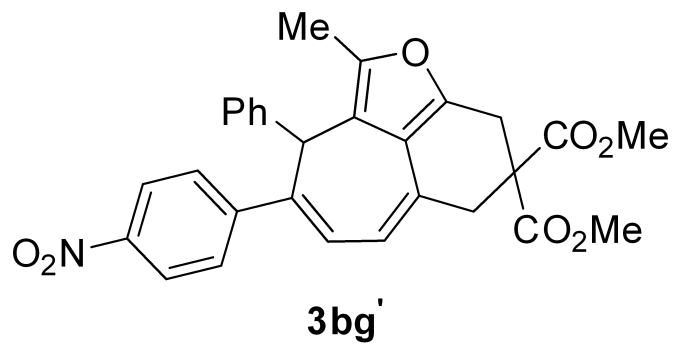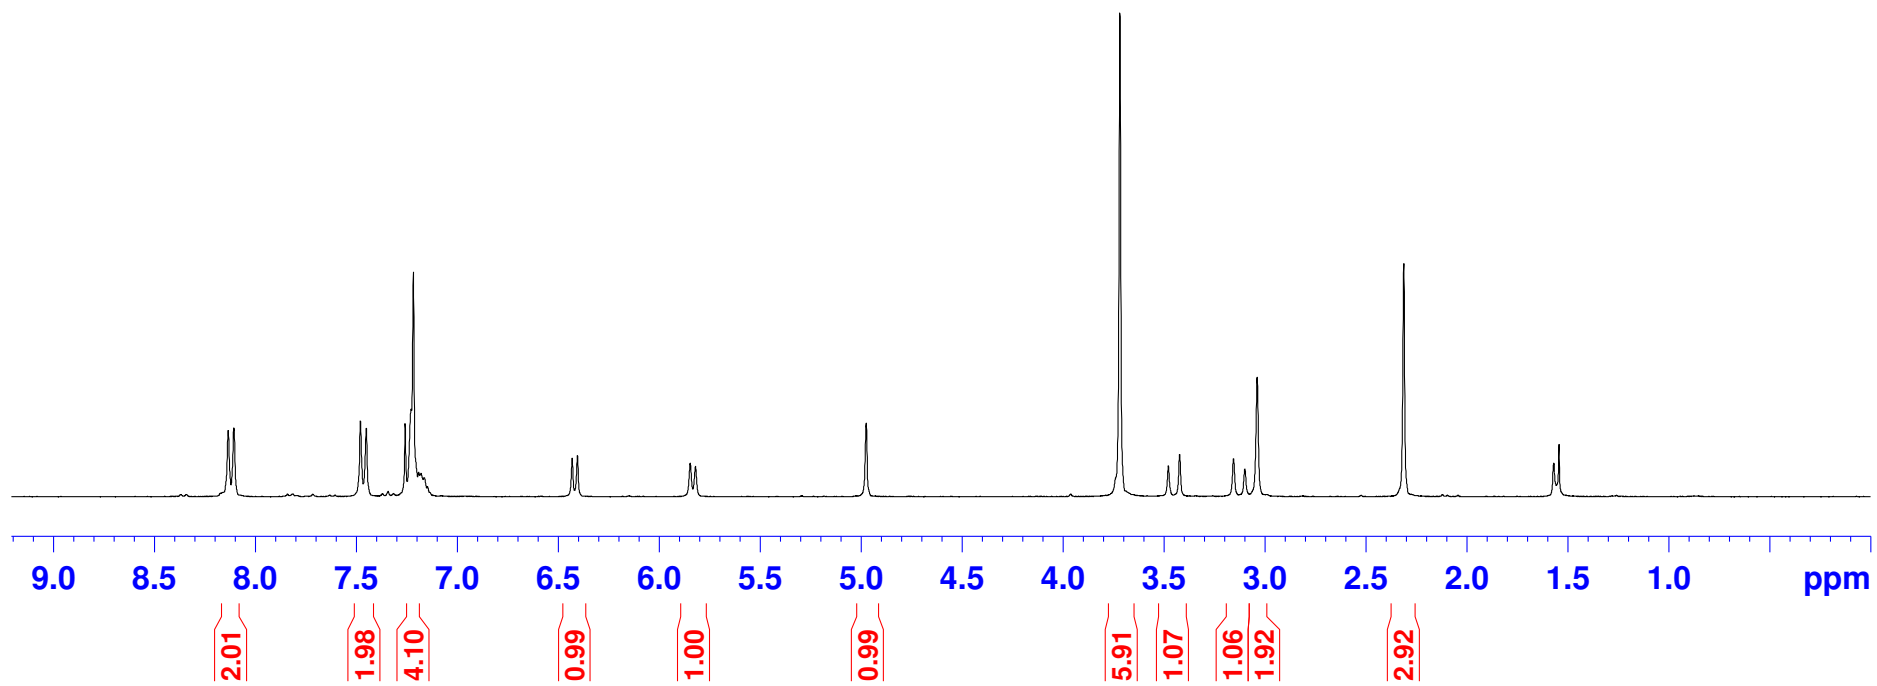

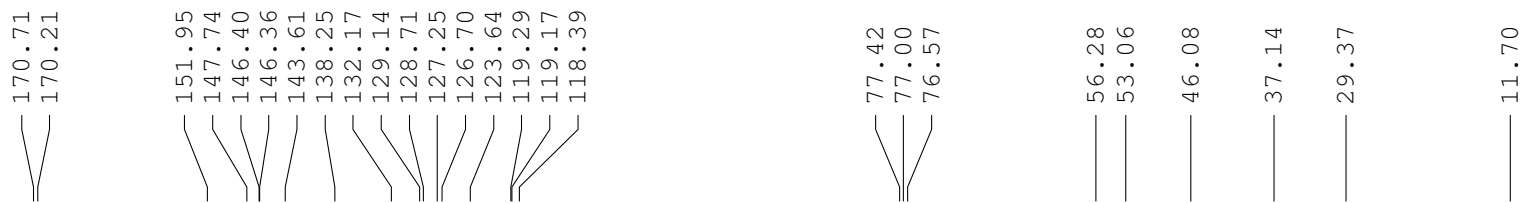

zwx-3-55-2

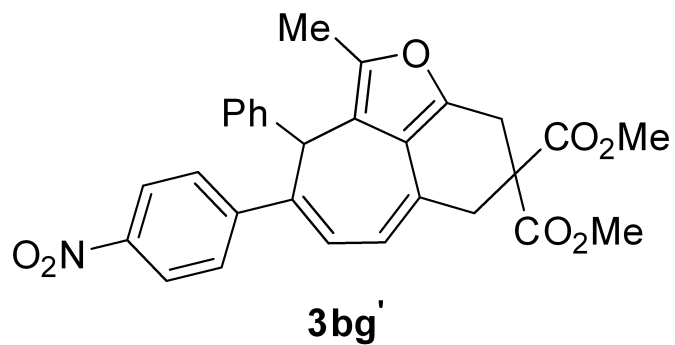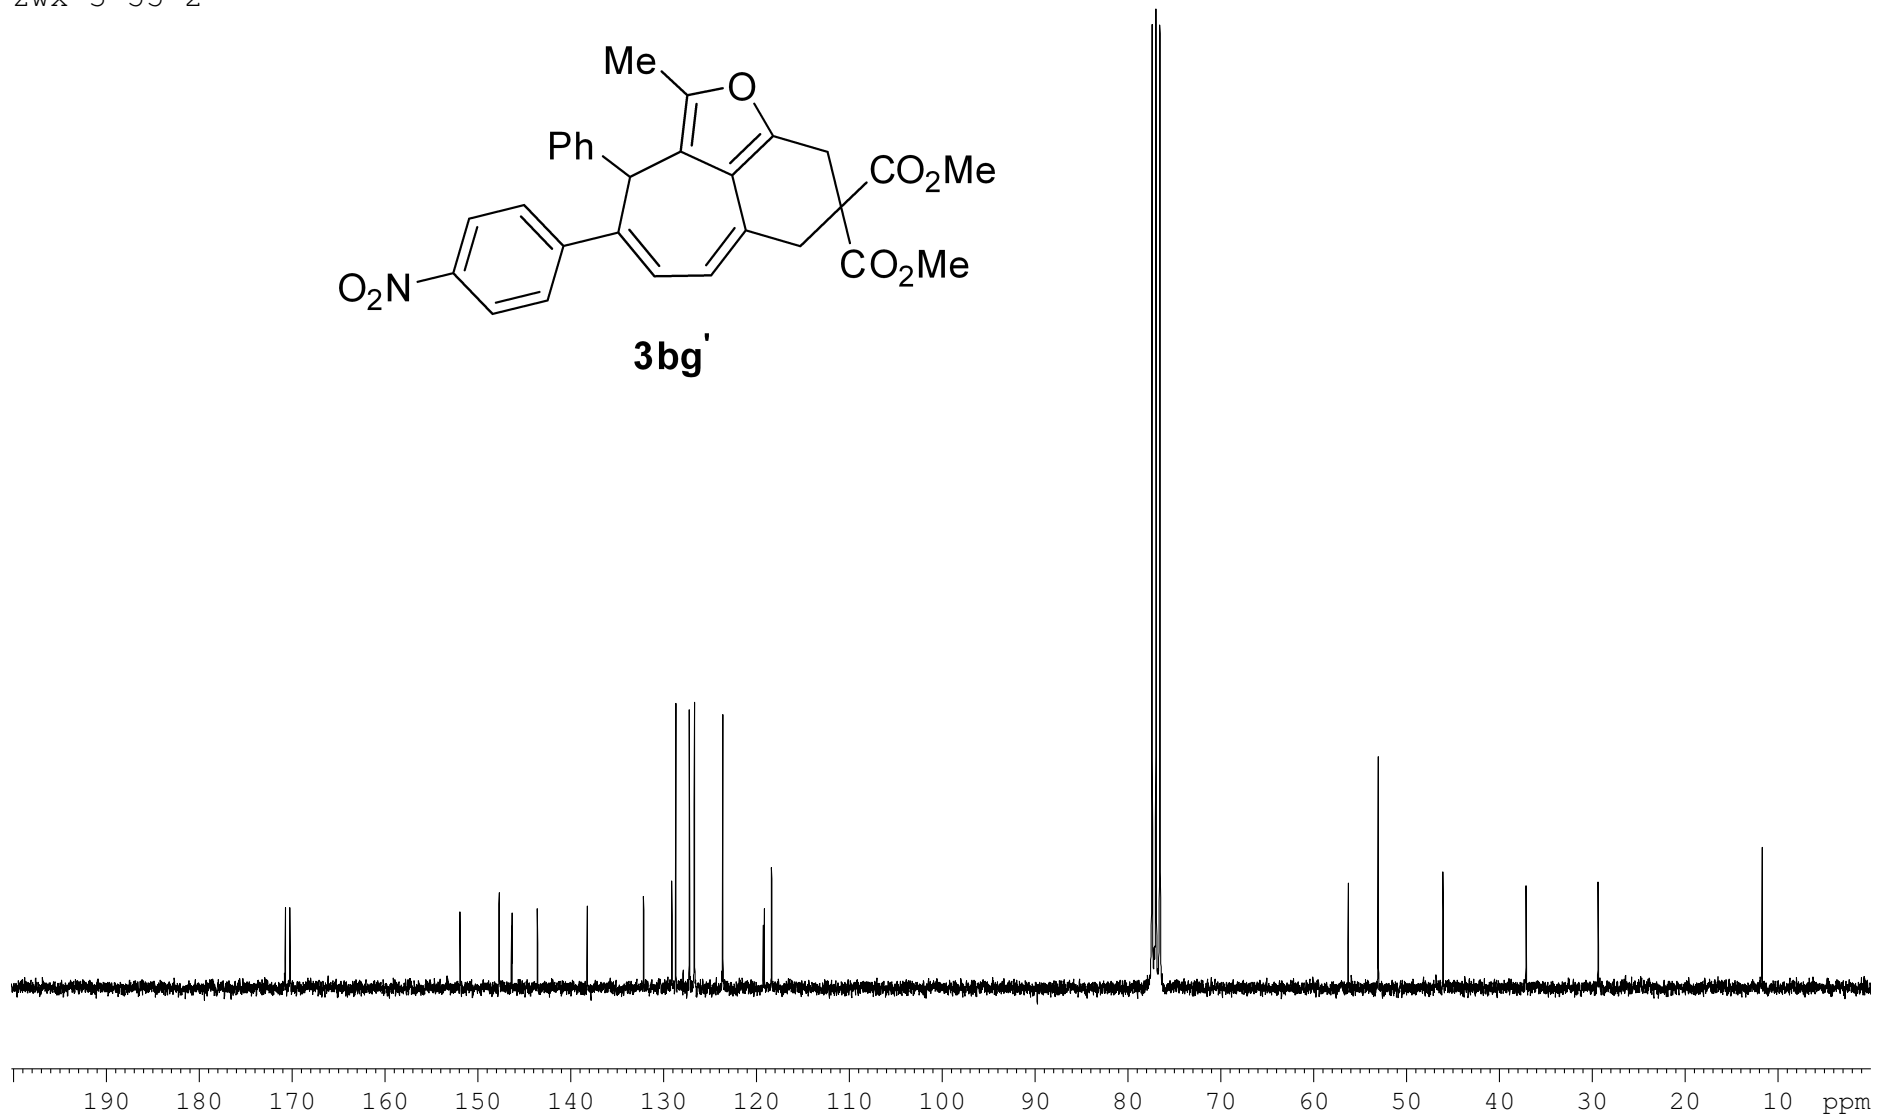

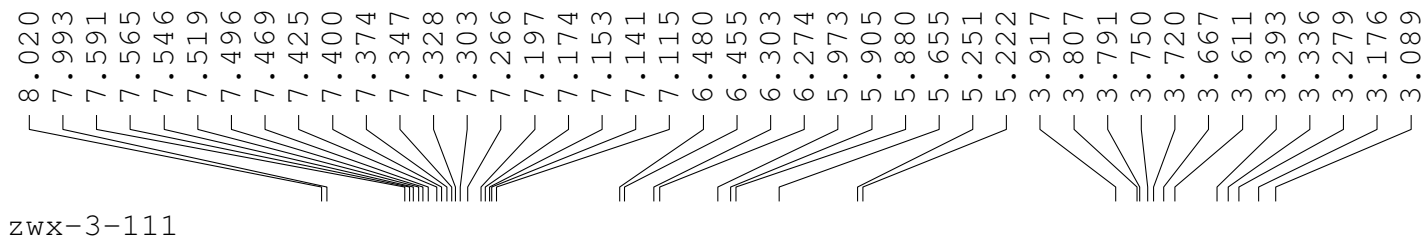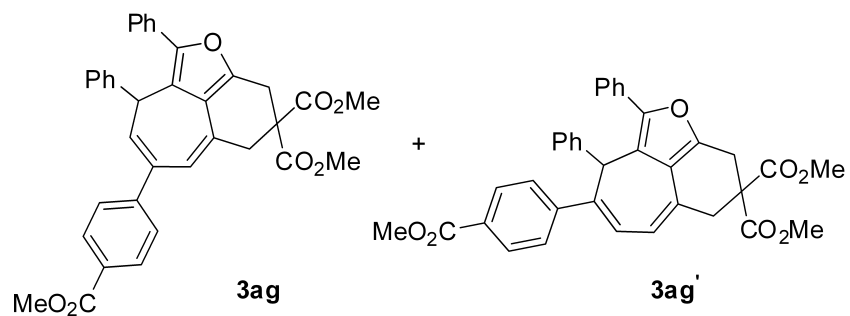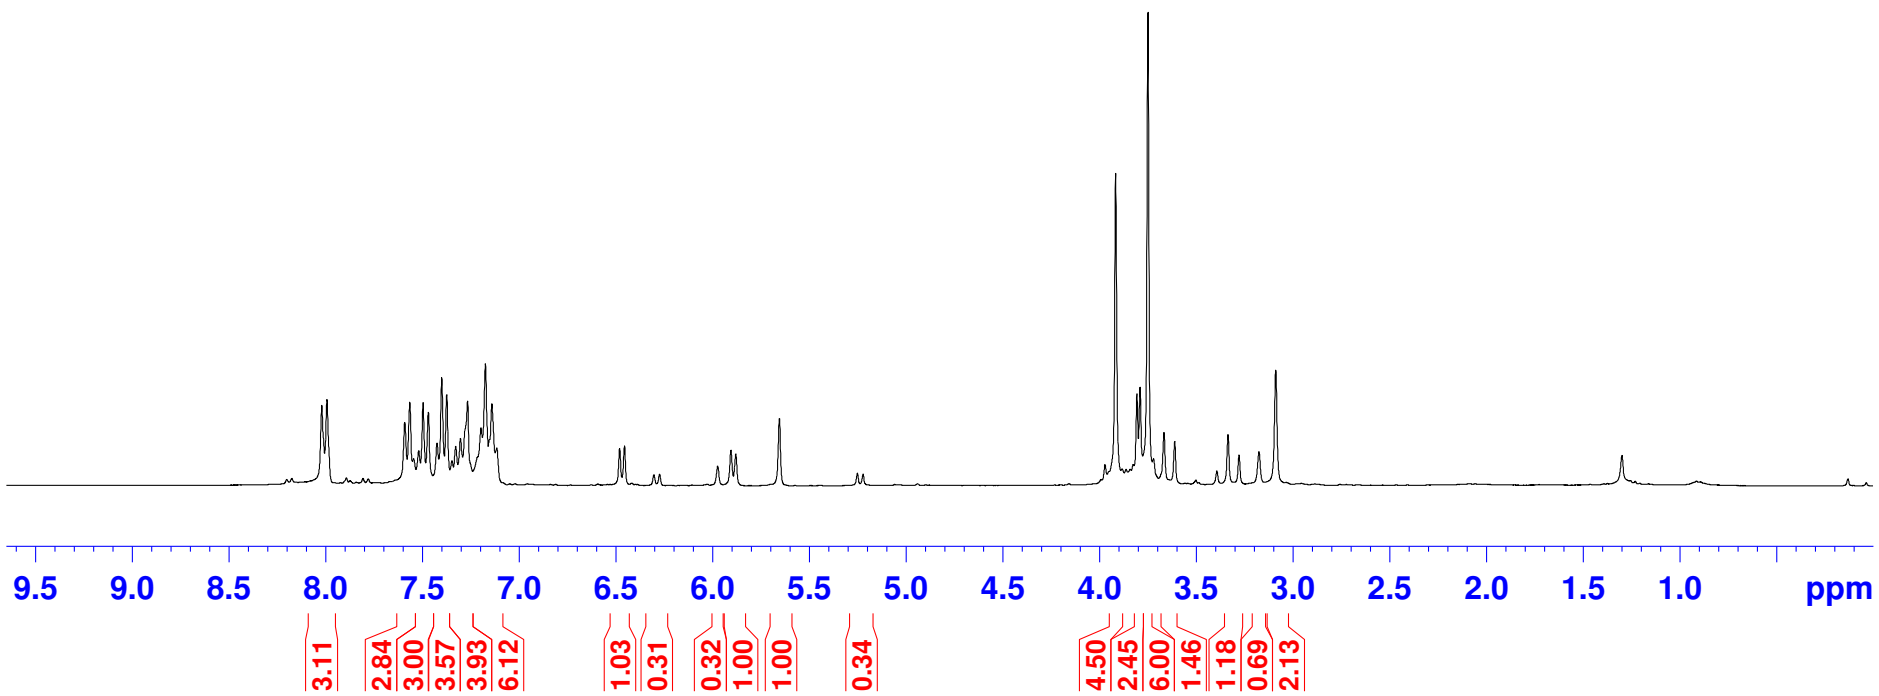

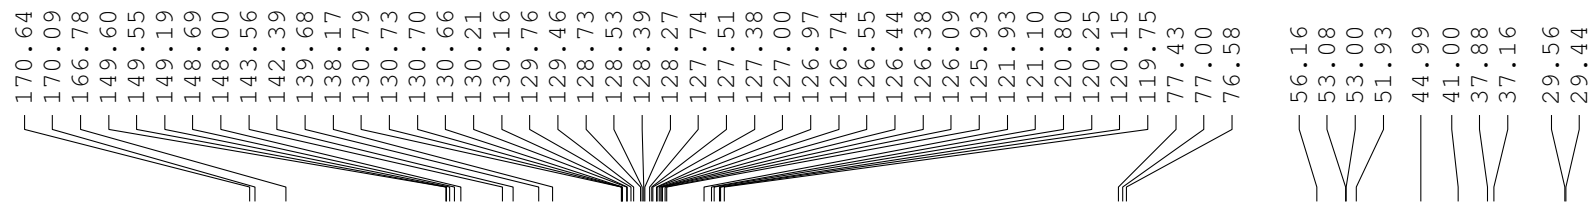

zwx-3-111

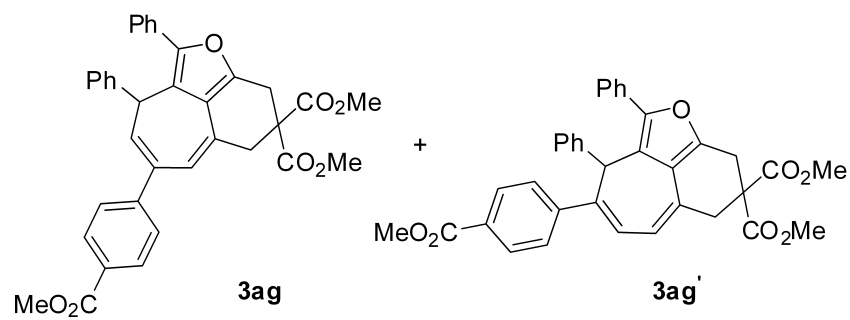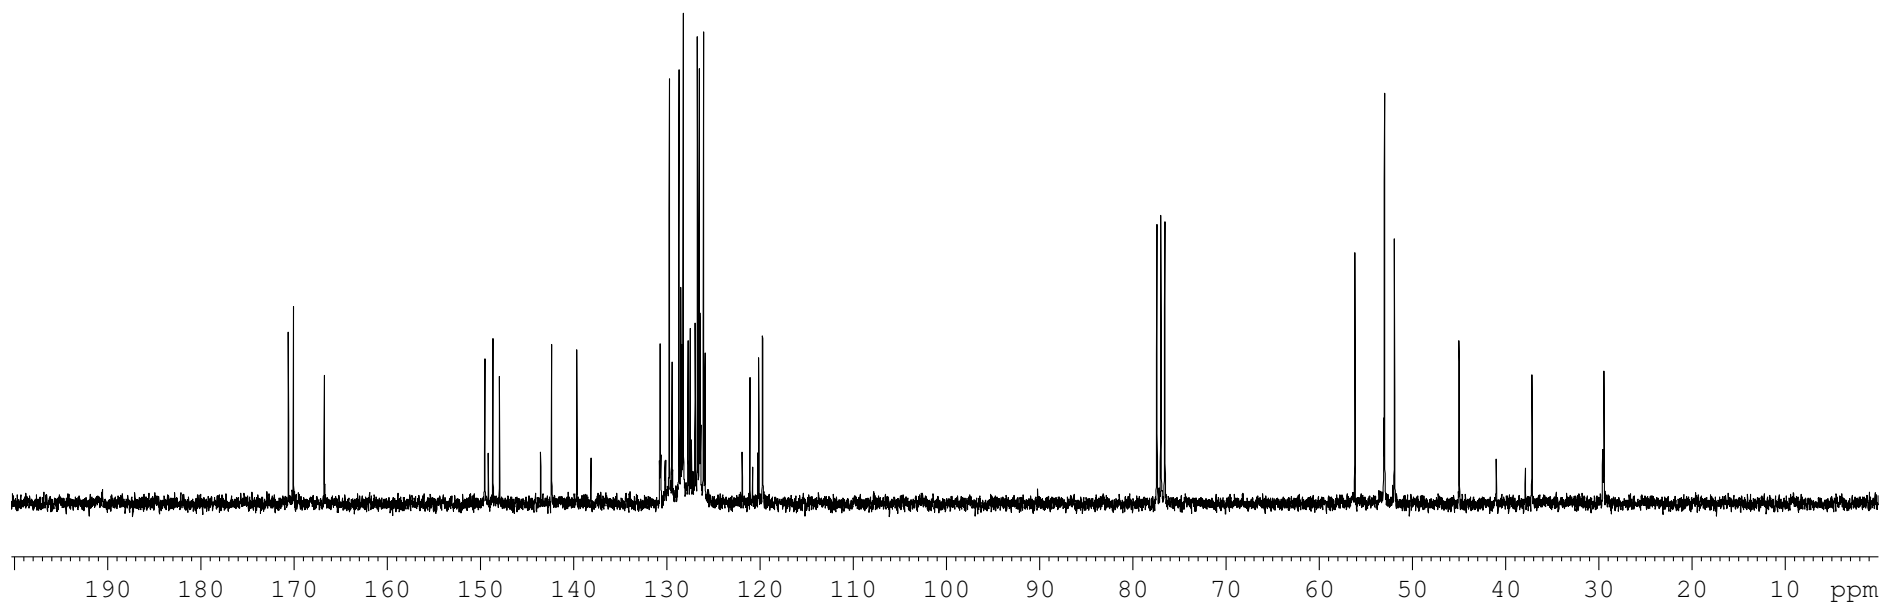

7.910  
7.884  
7.555  
7.529  
7.482  
7.455  
7.399  
7.374  
7.349  
7.305  
7.280  
7.252  
7.233  
7.167  
7.145  
7.101  
7.075  
6.456  
6.431  
6.270  
6.240  
5.932  
5.875  
5.850  
5.617  
5.215  
5.186  
3.784  
3.763  
3.724  
3.688  
3.632  
3.577  
3.359  
3.301  
3.244  
3.139  
3.055  
2.576

zwx-3-110

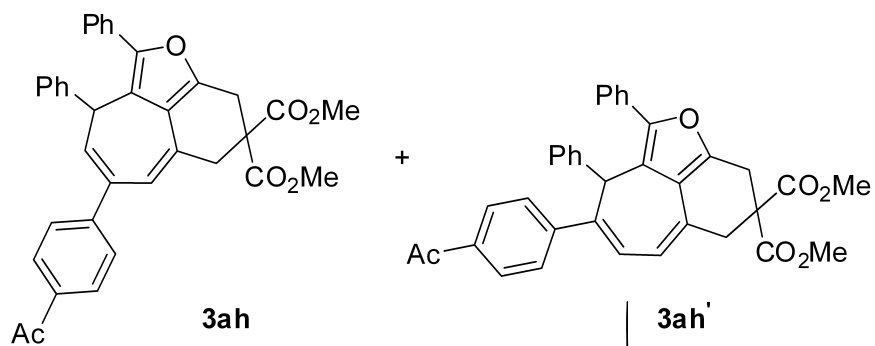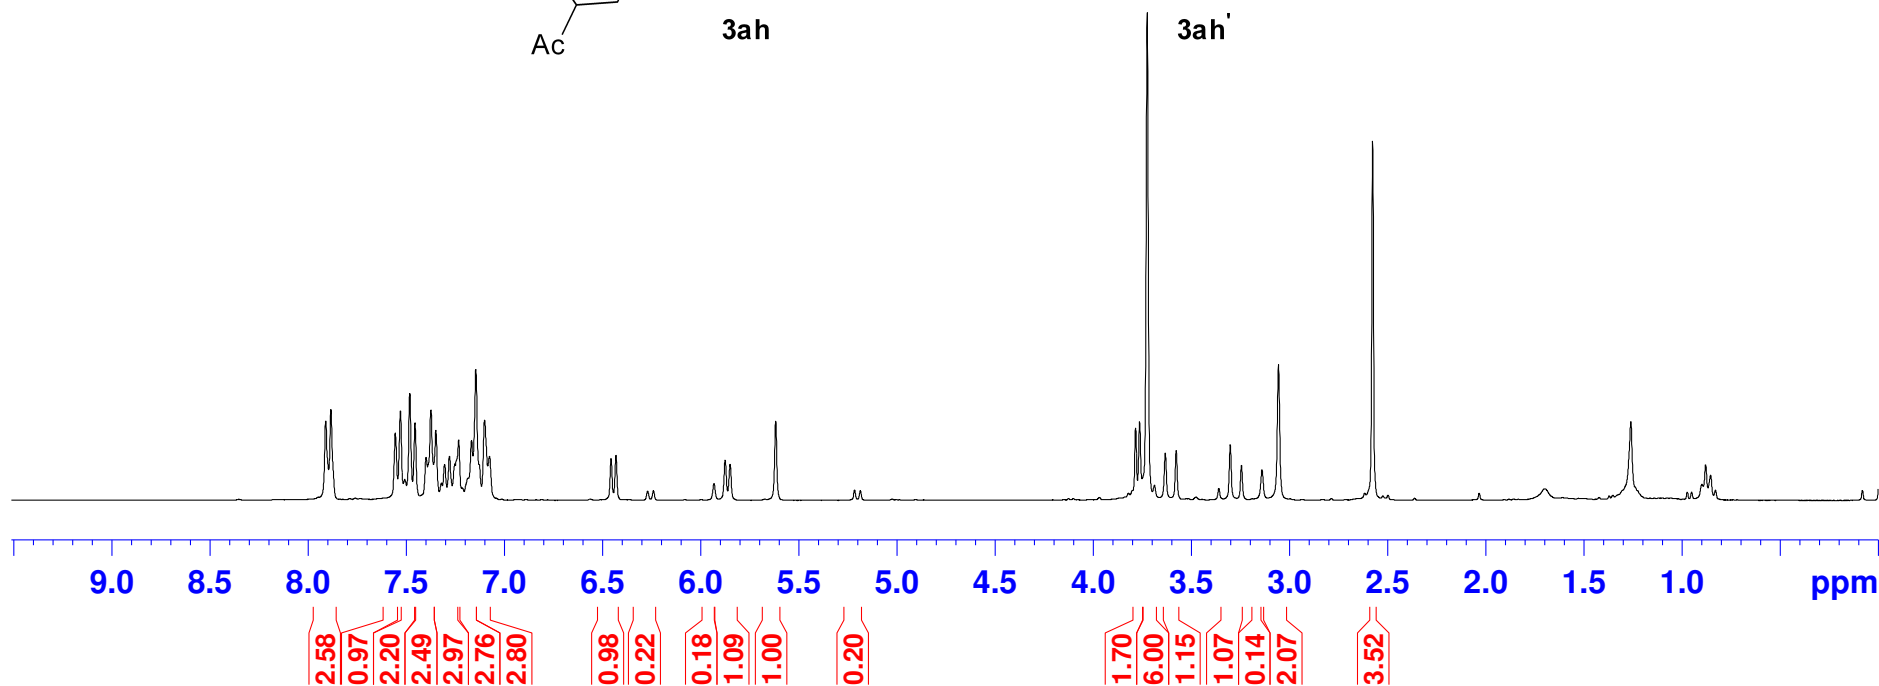

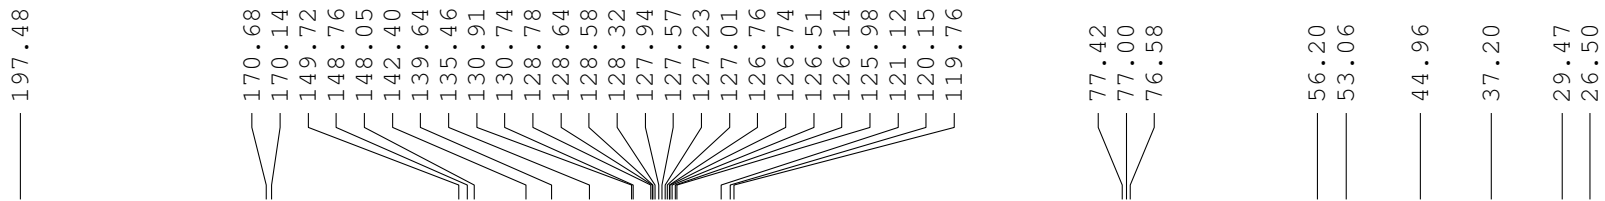

zwx-3-110

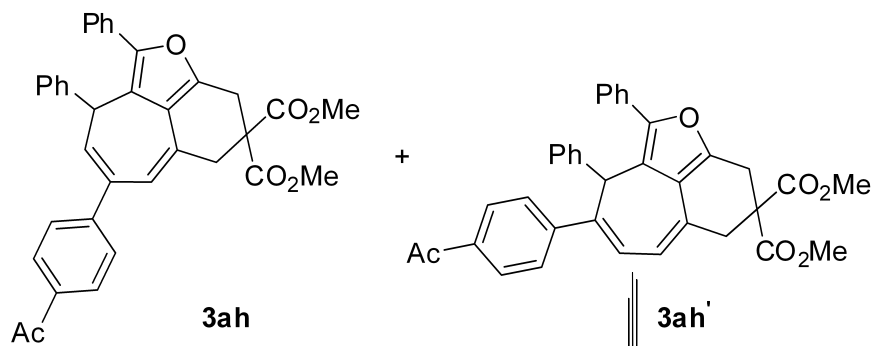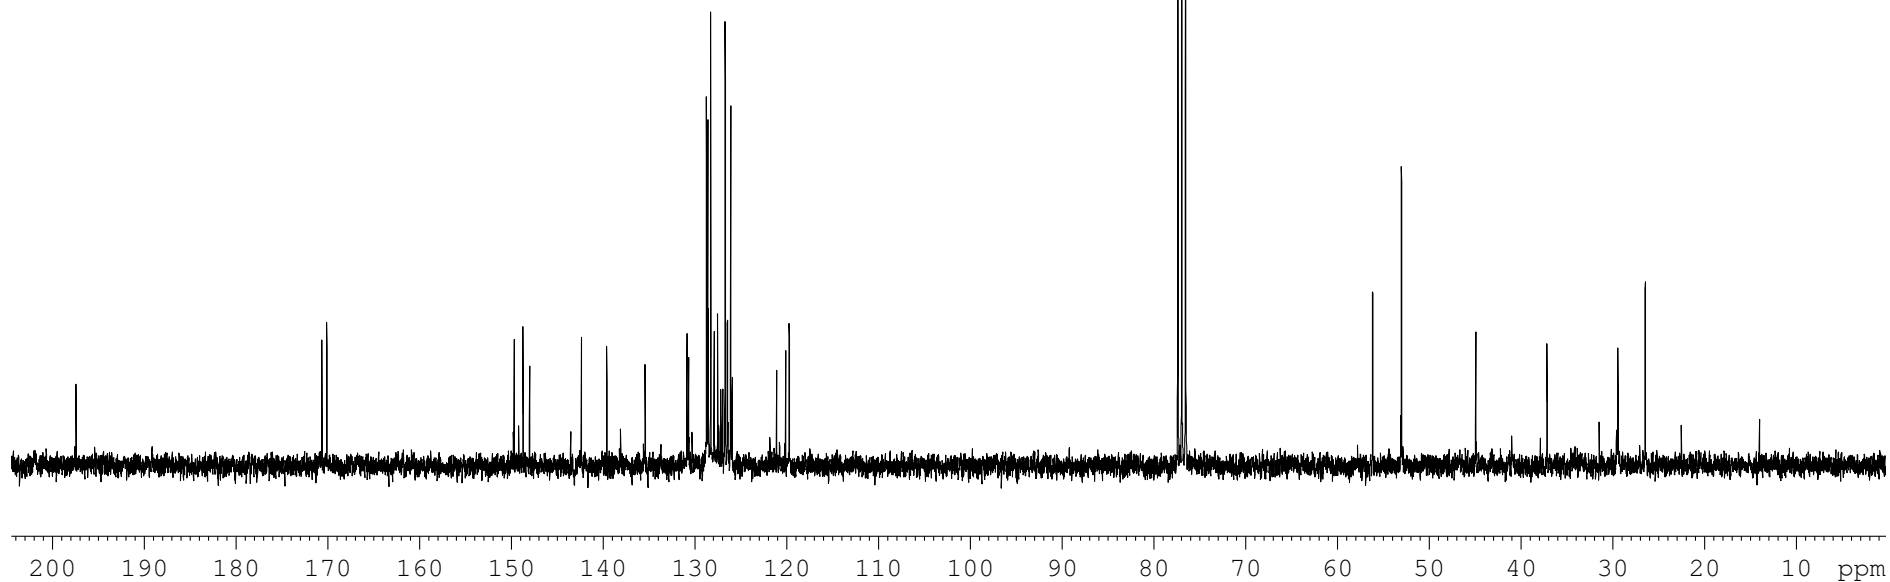

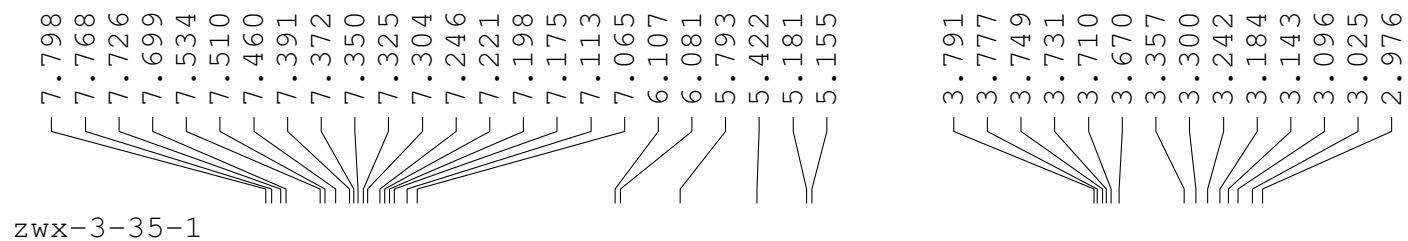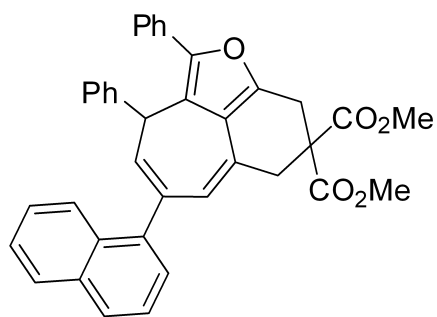

3ai

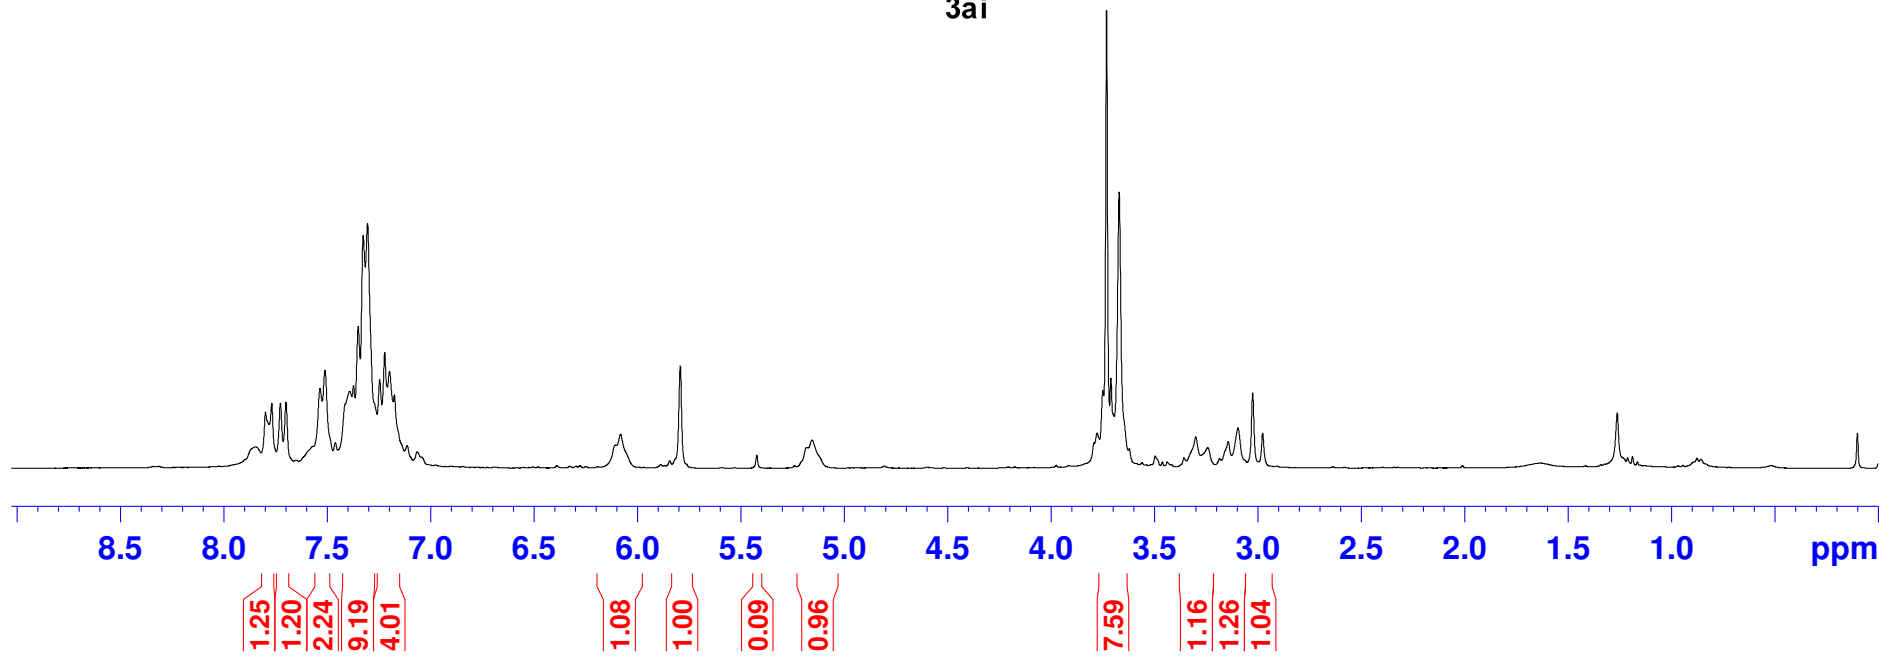

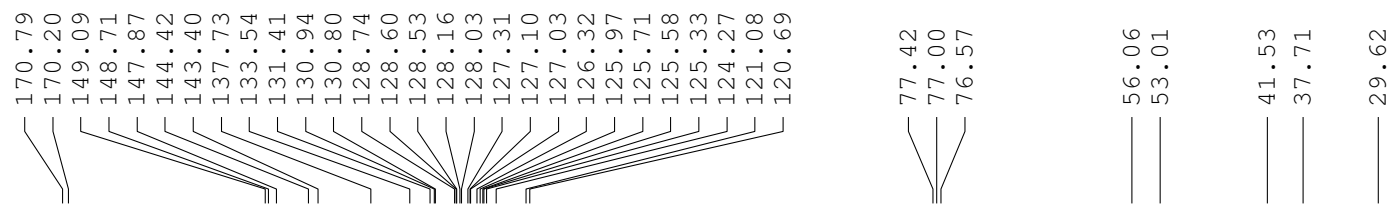

zwx-3-35-1

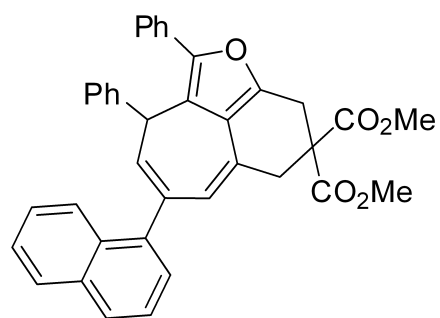

3ai

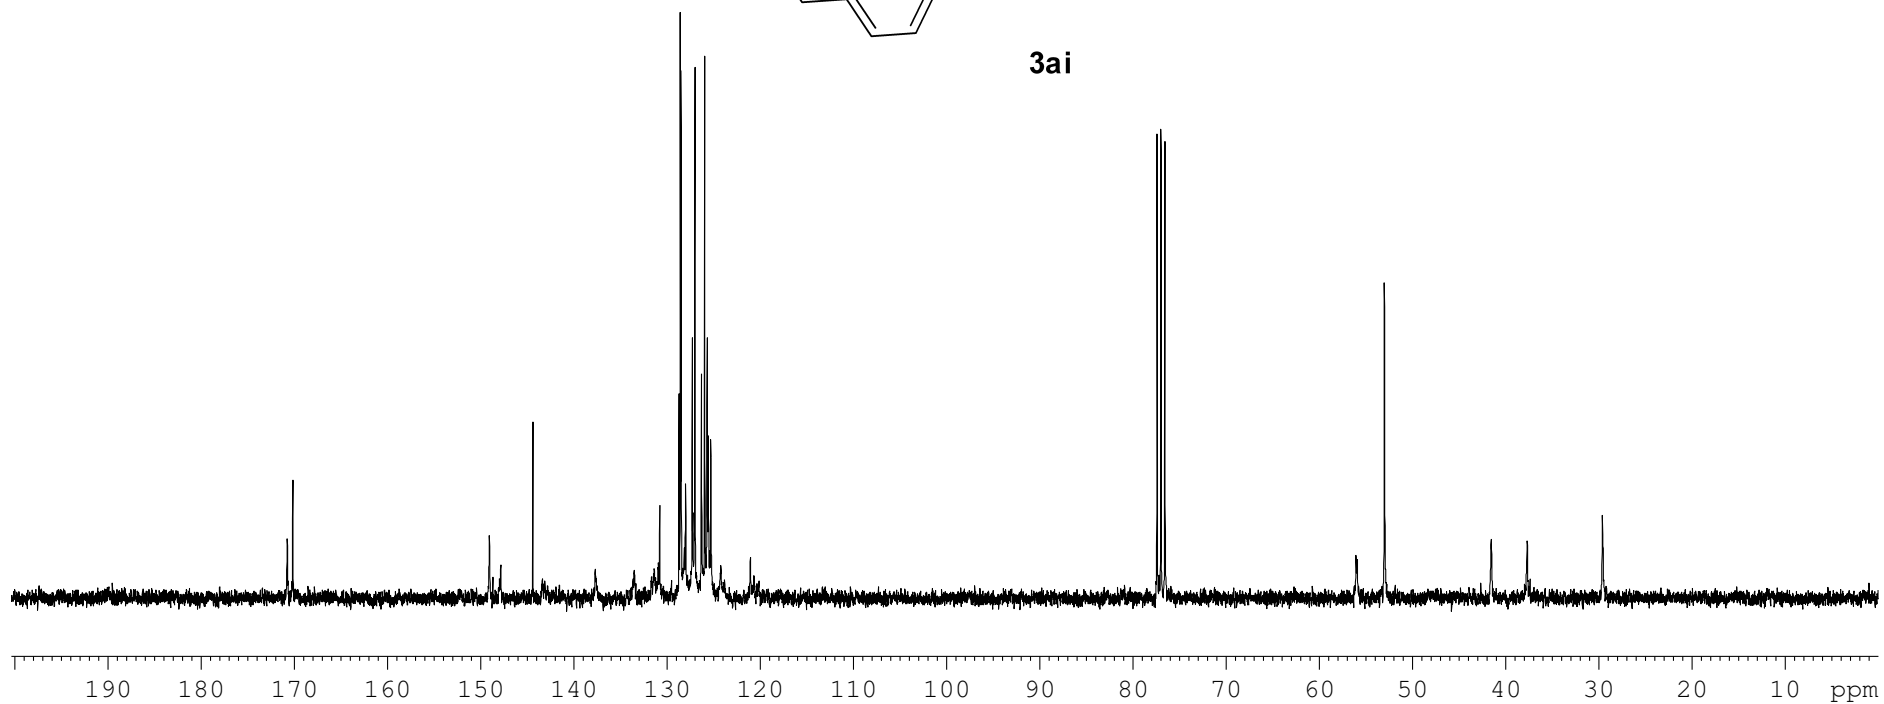



7.598  
7.572  
7.508  
7.482  
7.433  
7.408  
7.392  
7.358  
7.333  
7.307  
7.253  
7.236  
7.233  
7.229  
7.217  
7.189  
7.167  
7.155  
7.136  
7.113  
7.098  
7.064  
7.039  
7.003  
6.978  
6.171  
6.146  
6.054  
6.024  
5.795  
5.747  
5.701  
5.568  
5.081  
5.051  
3.751  
3.701  
3.685  
3.648  
3.591  
3.264  
3.207  
3.038  
2.988  
2.273  
2.199  
2.064  
2.005  
1.693  
1.651  
1.609  
1.591  
1.572

zwx-3-37-1

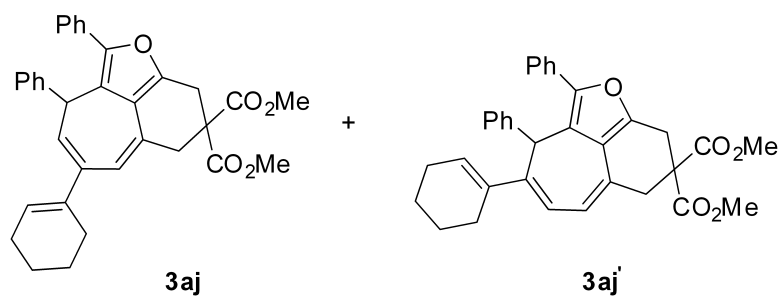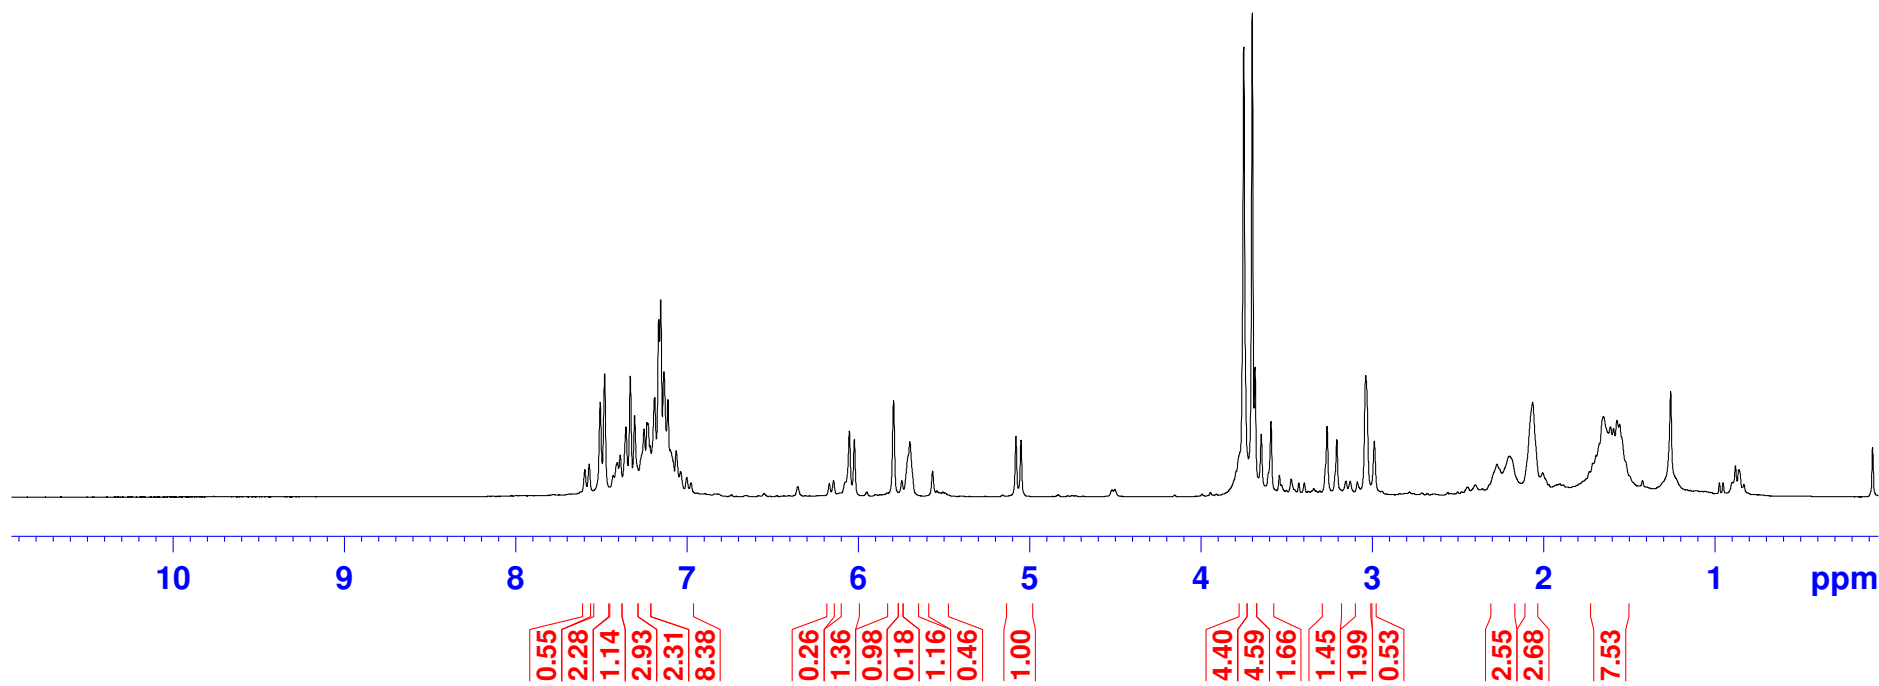

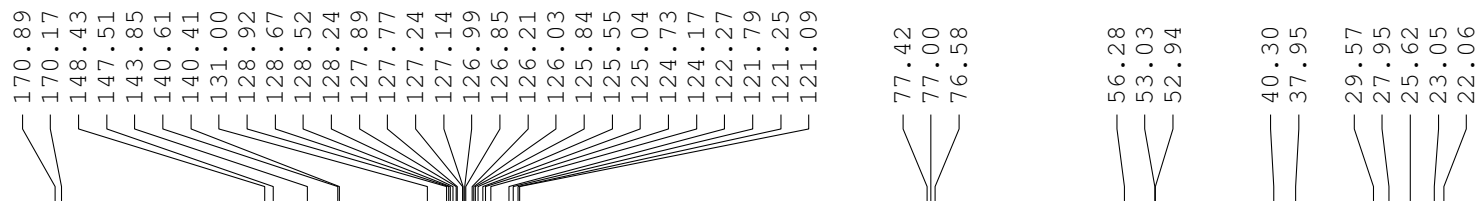

zwx-3-37-1

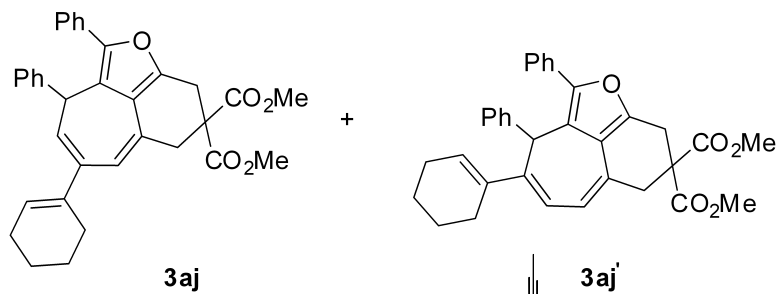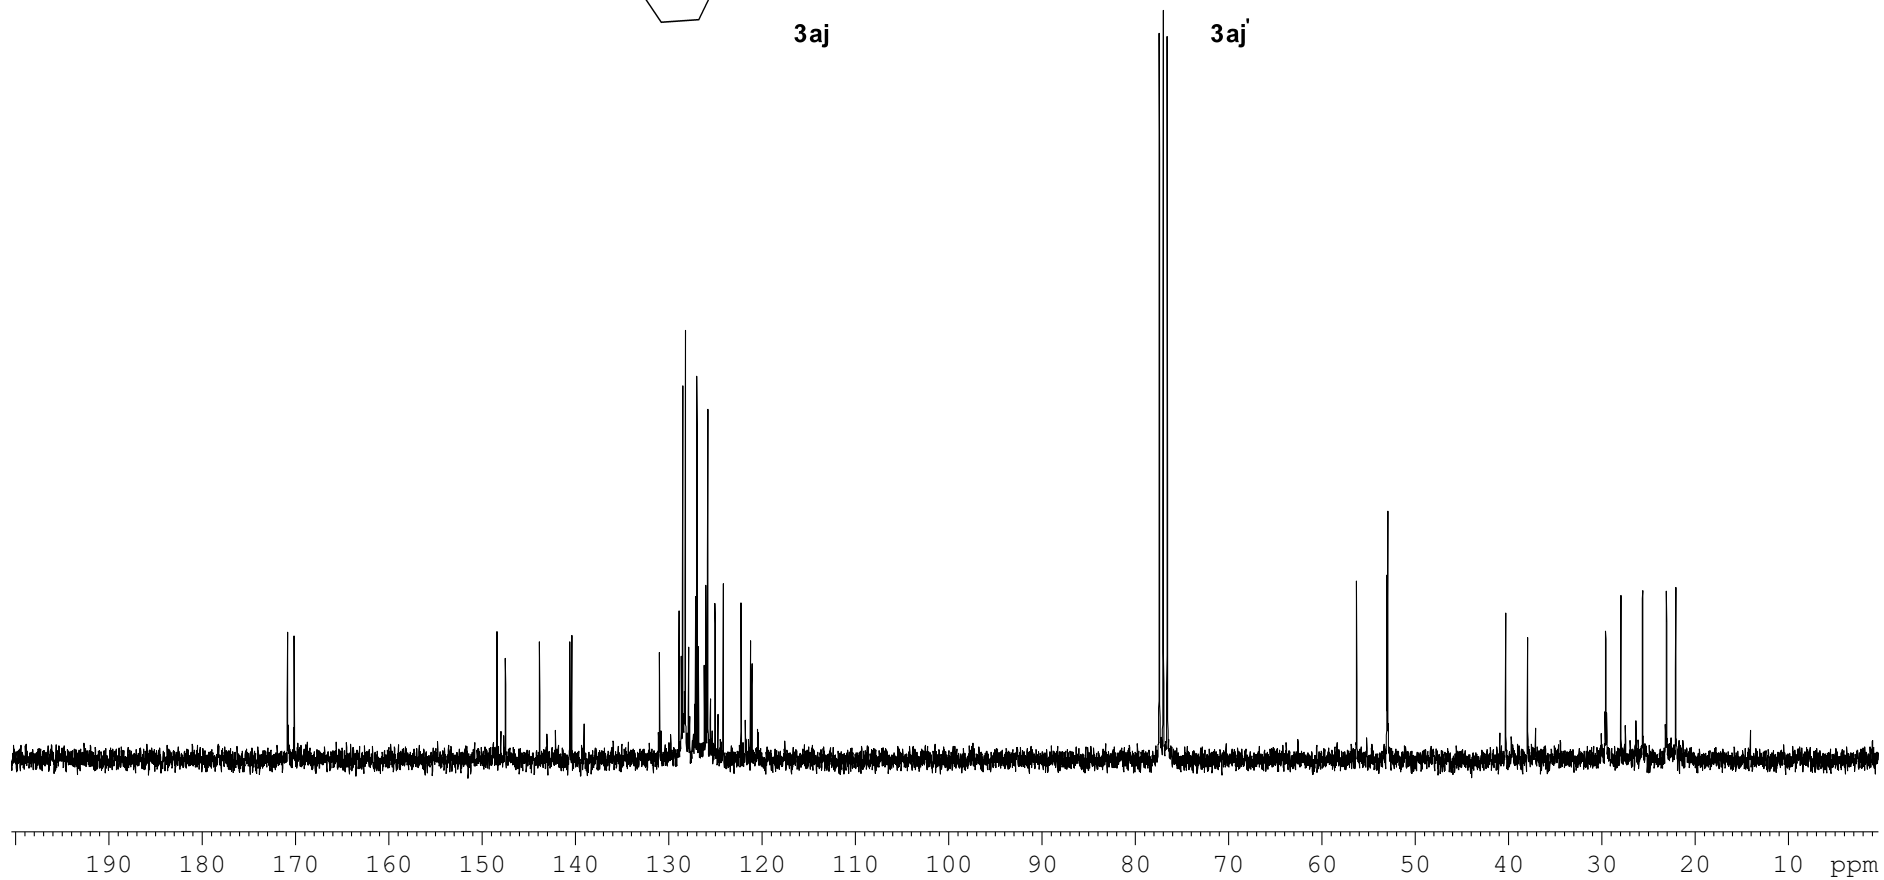

7.648  
7.622  
7.555  
7.529  
7.426  
7.407  
7.383  
7.358  
7.316  
7.296  
7.273  
7.247  
7.177  
7.150  
7.113  
5.884  
5.859  
5.801  
5.772  
5.636  
5.612  
5.532  
5.034  
4.855  
4.827  
4.792  
4.778  
4.765  
4.751  
4.615  
4.596  
4.576  
3.904  
3.892  
3.773  
3.764  
3.731  
3.700  
3.608  
3.568  
3.550  
3.514  
3.280  
3.233  
3.176  
3.095  
3.047  
3.030  
2.371  
2.322

zwx-3-39-1

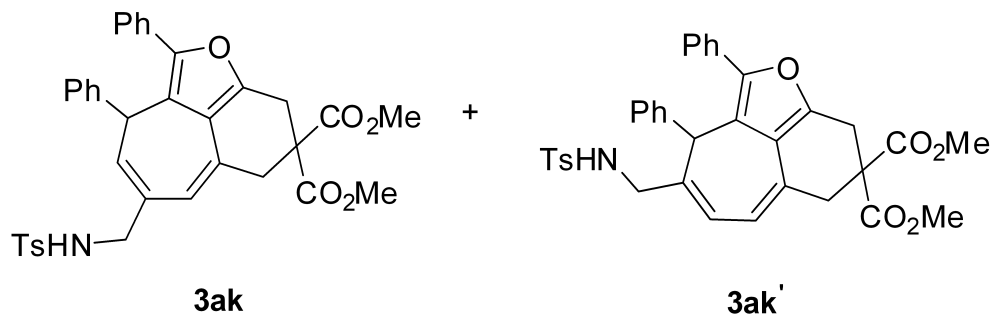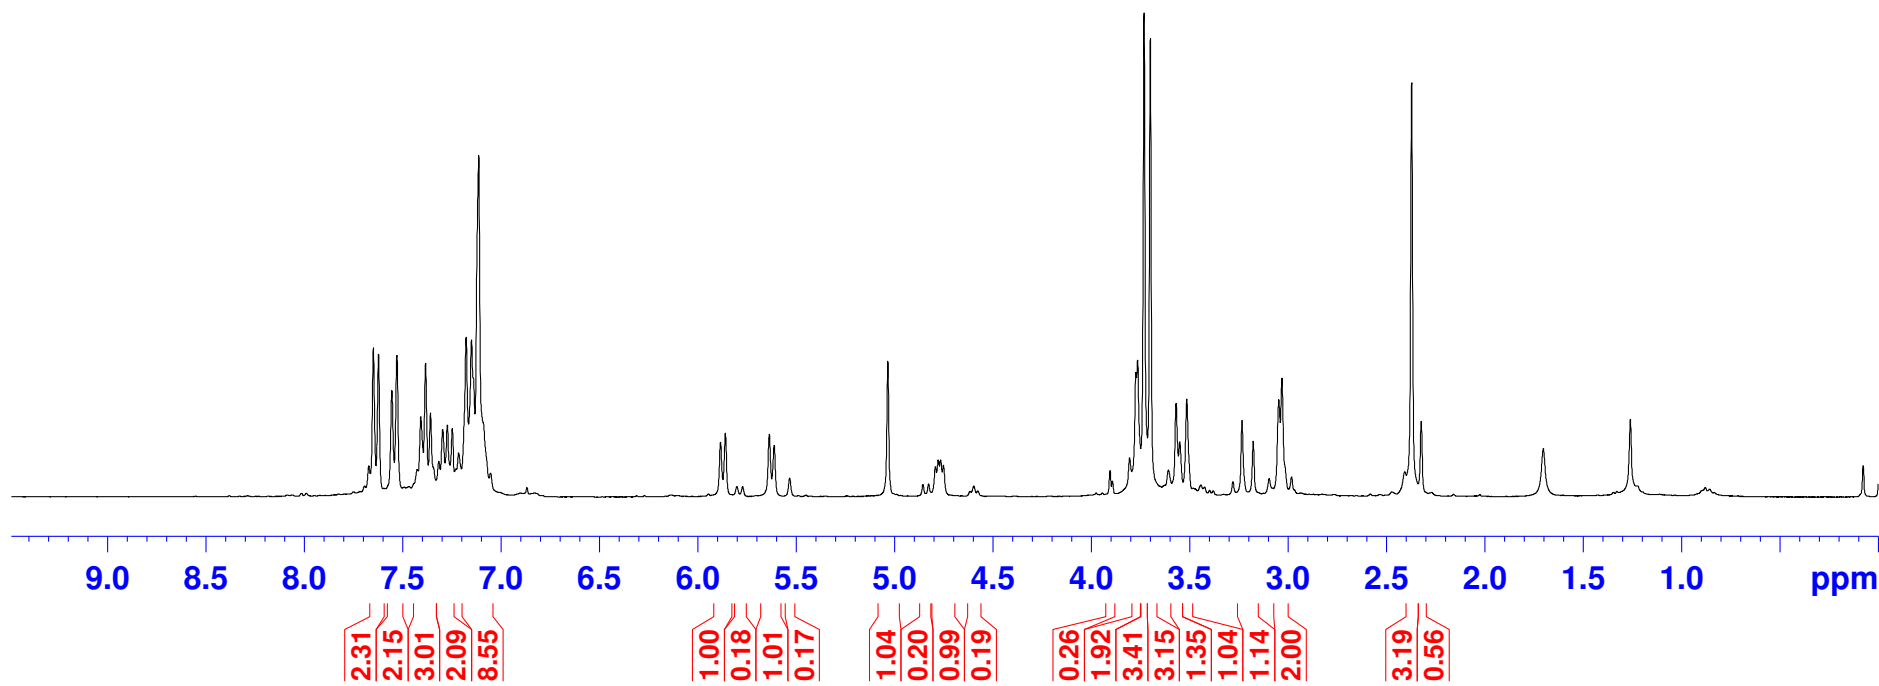

zwx-3-39-1

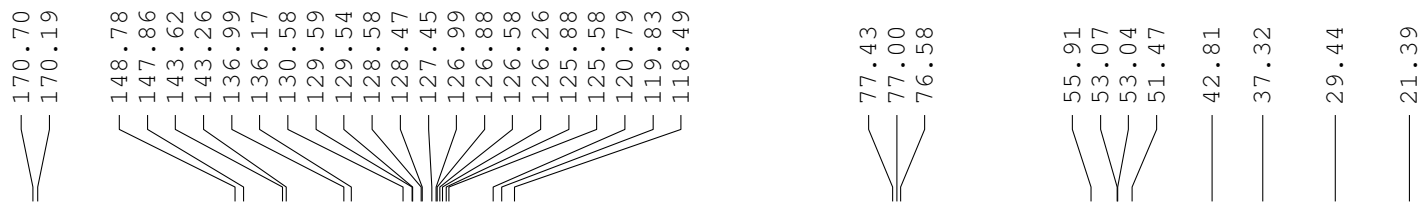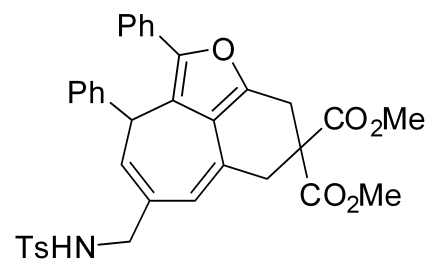

**3ak**

+

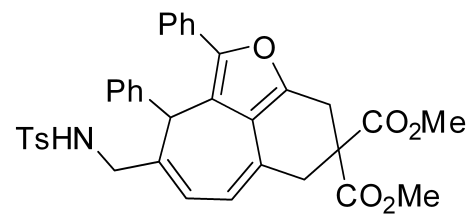

**3ak'**

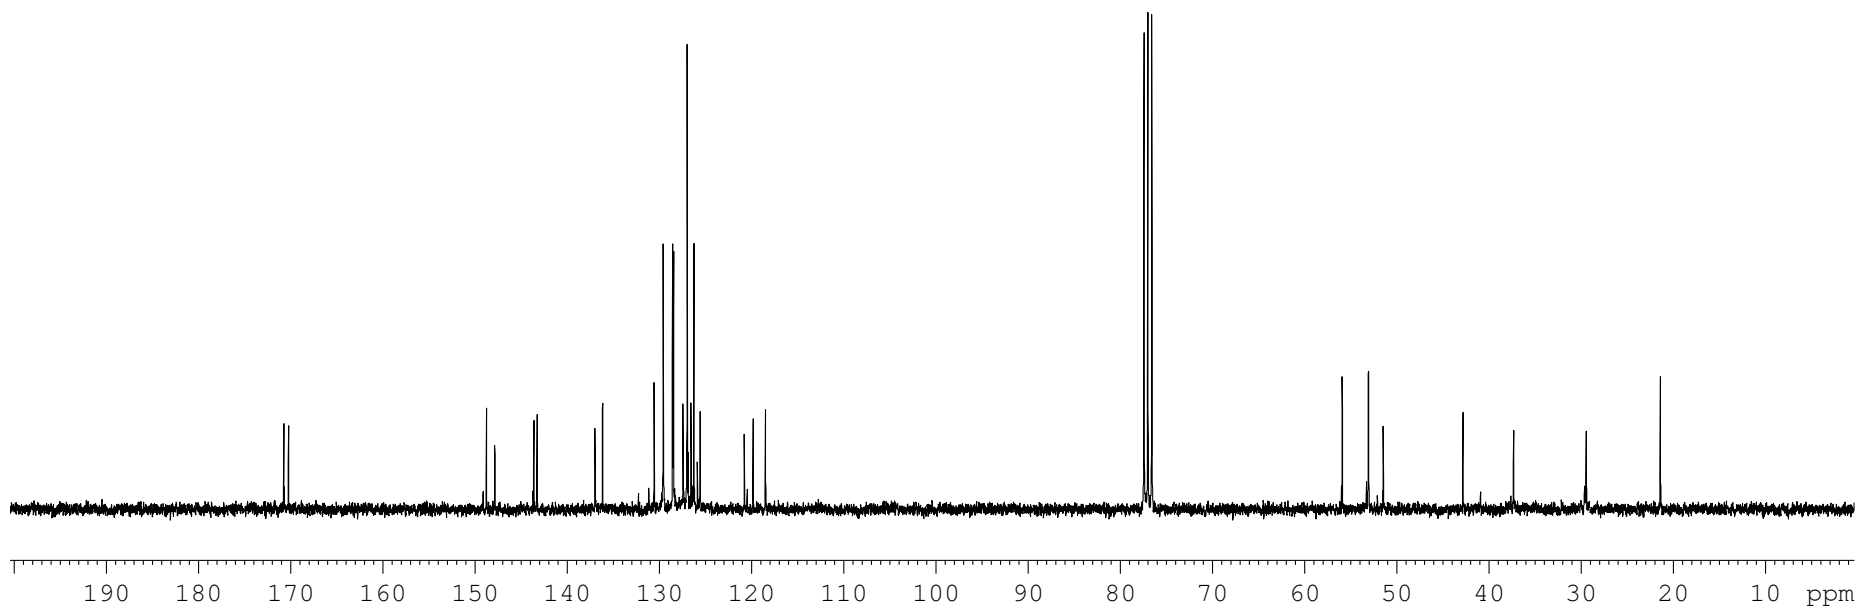

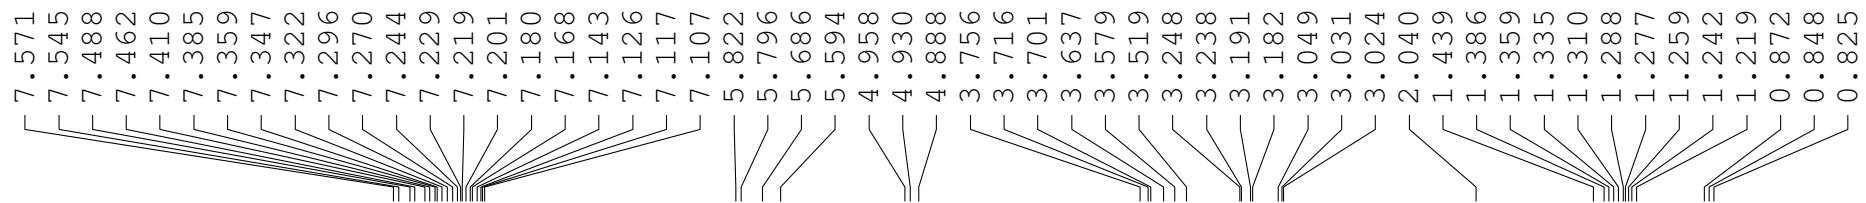

zwx-3-39-2

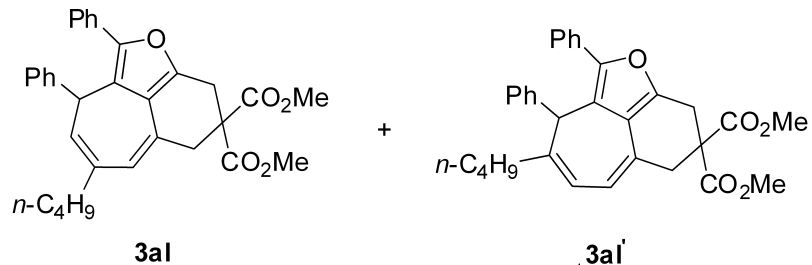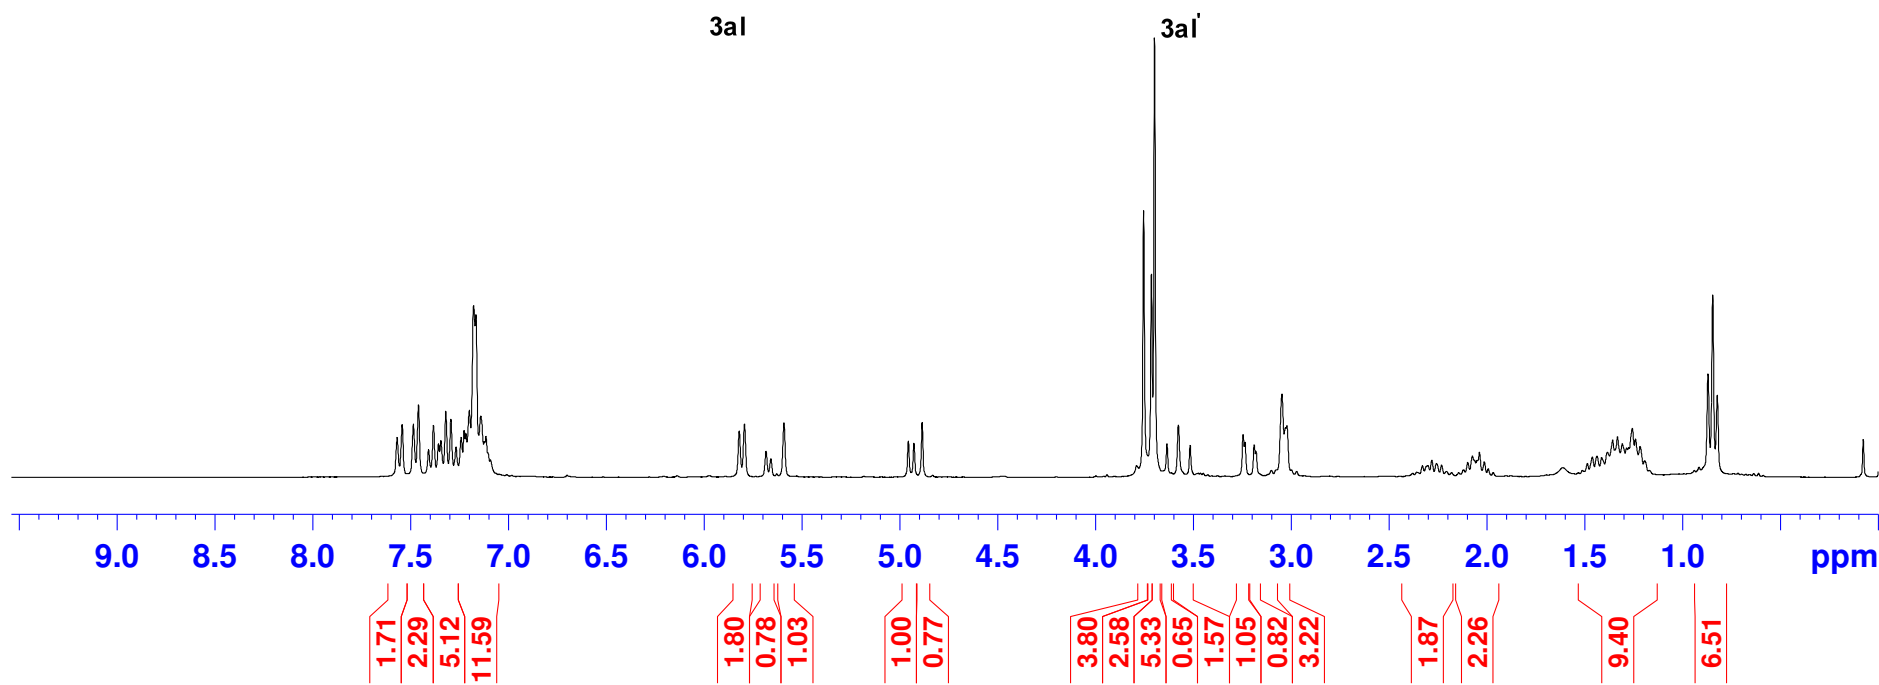

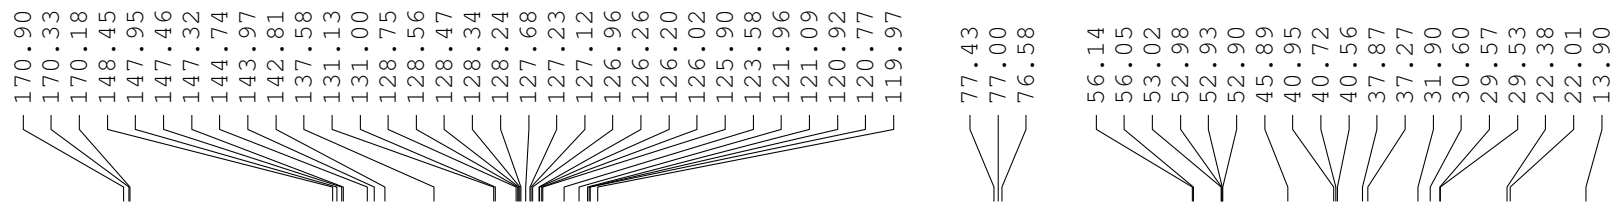

zwx-3-39-2

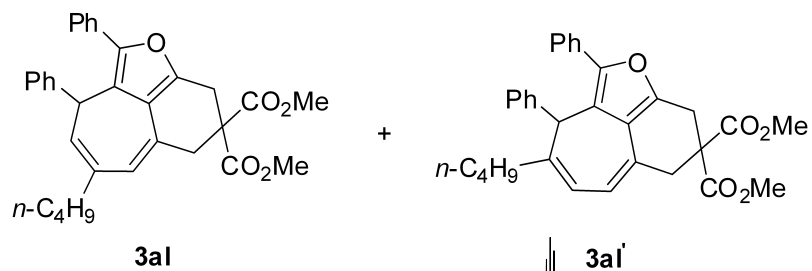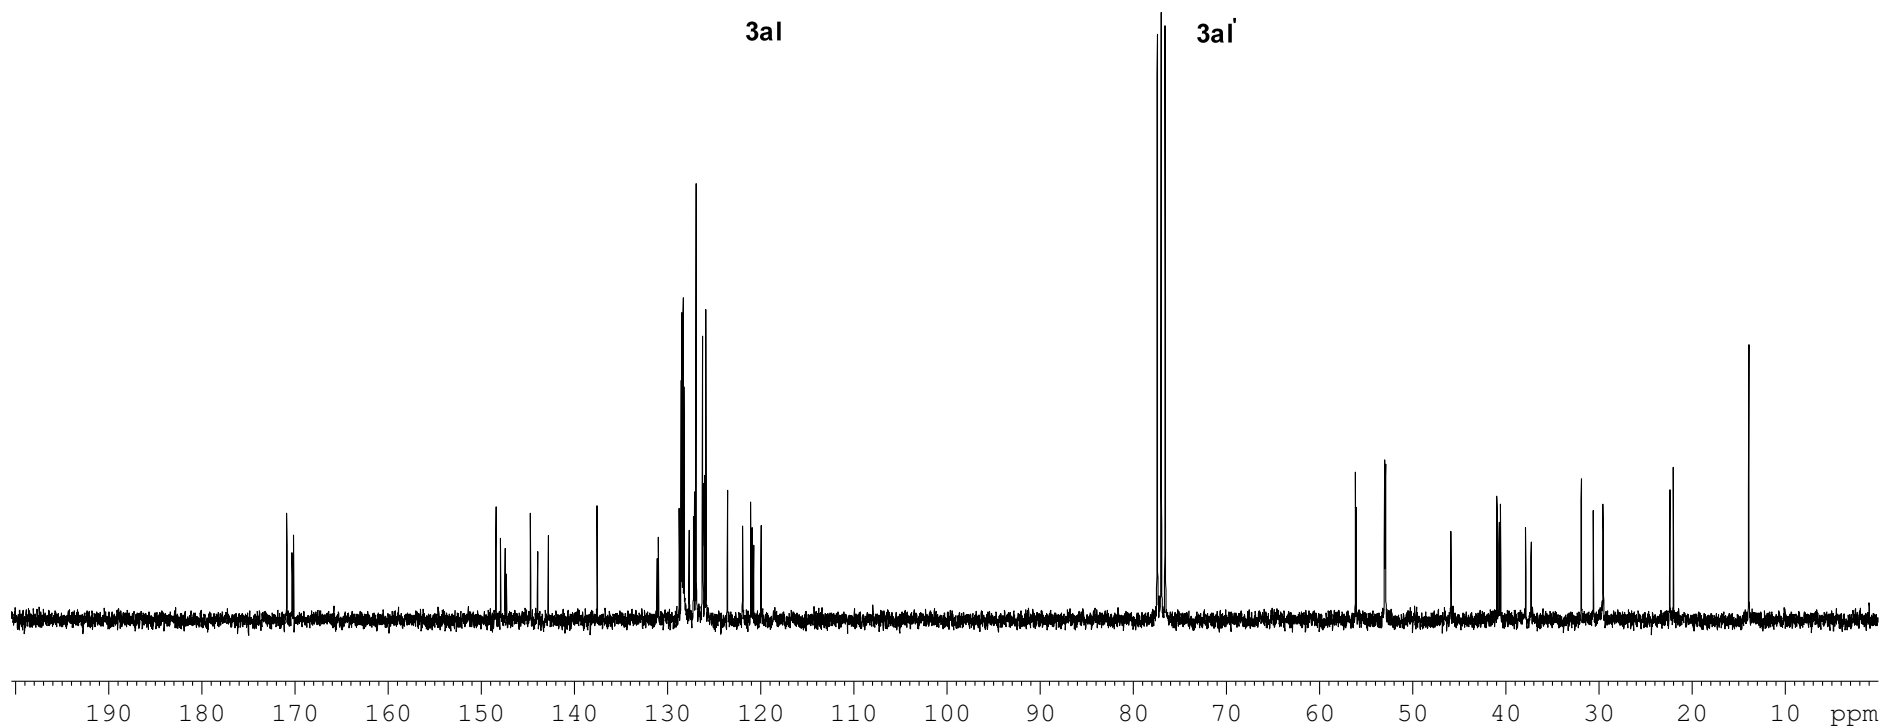

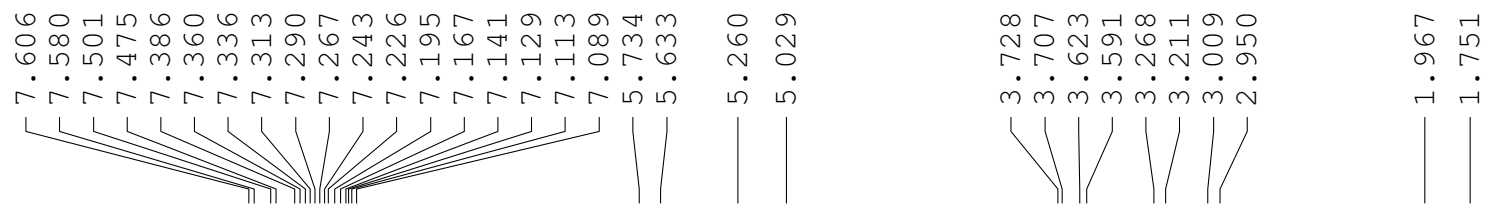

zwx-3-79

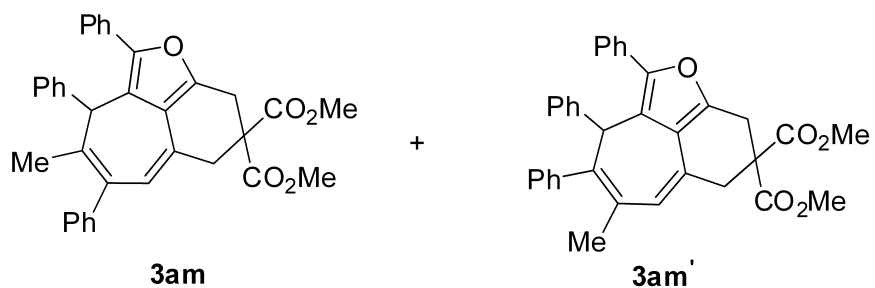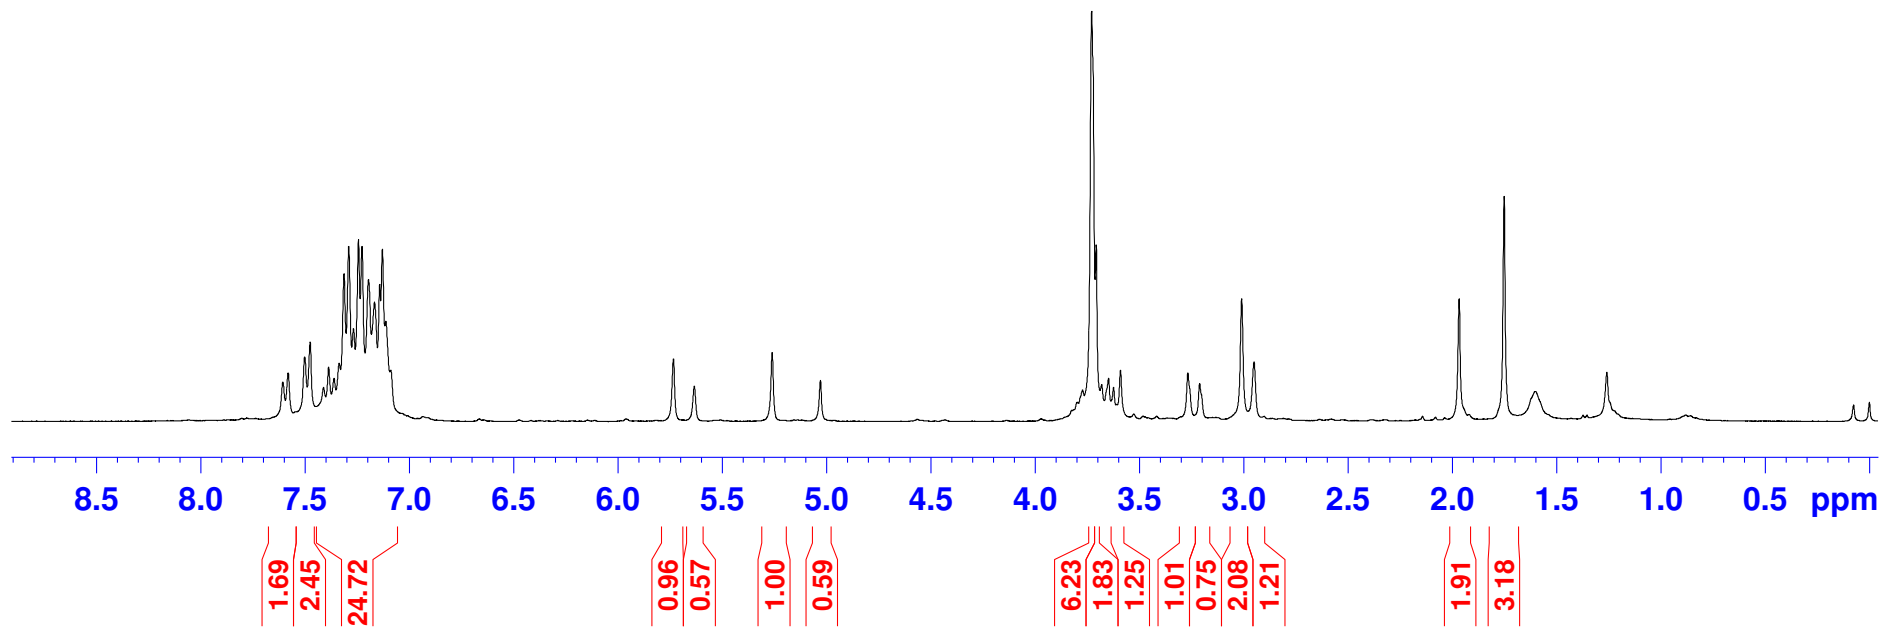

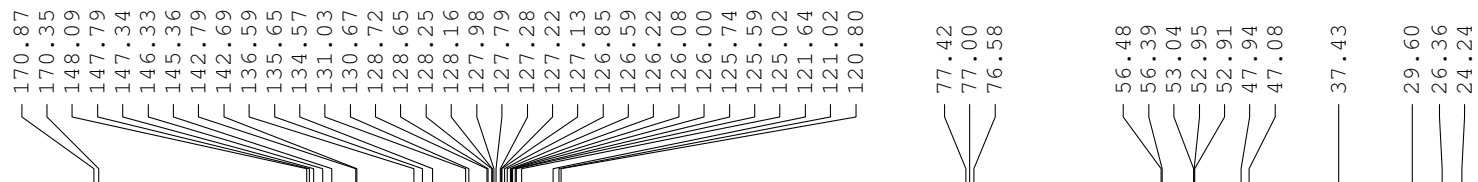

zwx-3-79

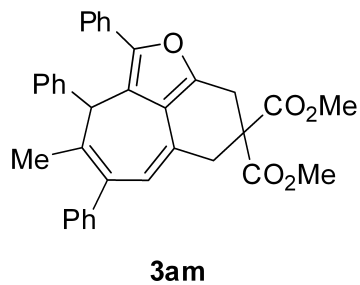

+

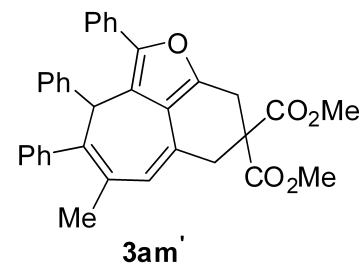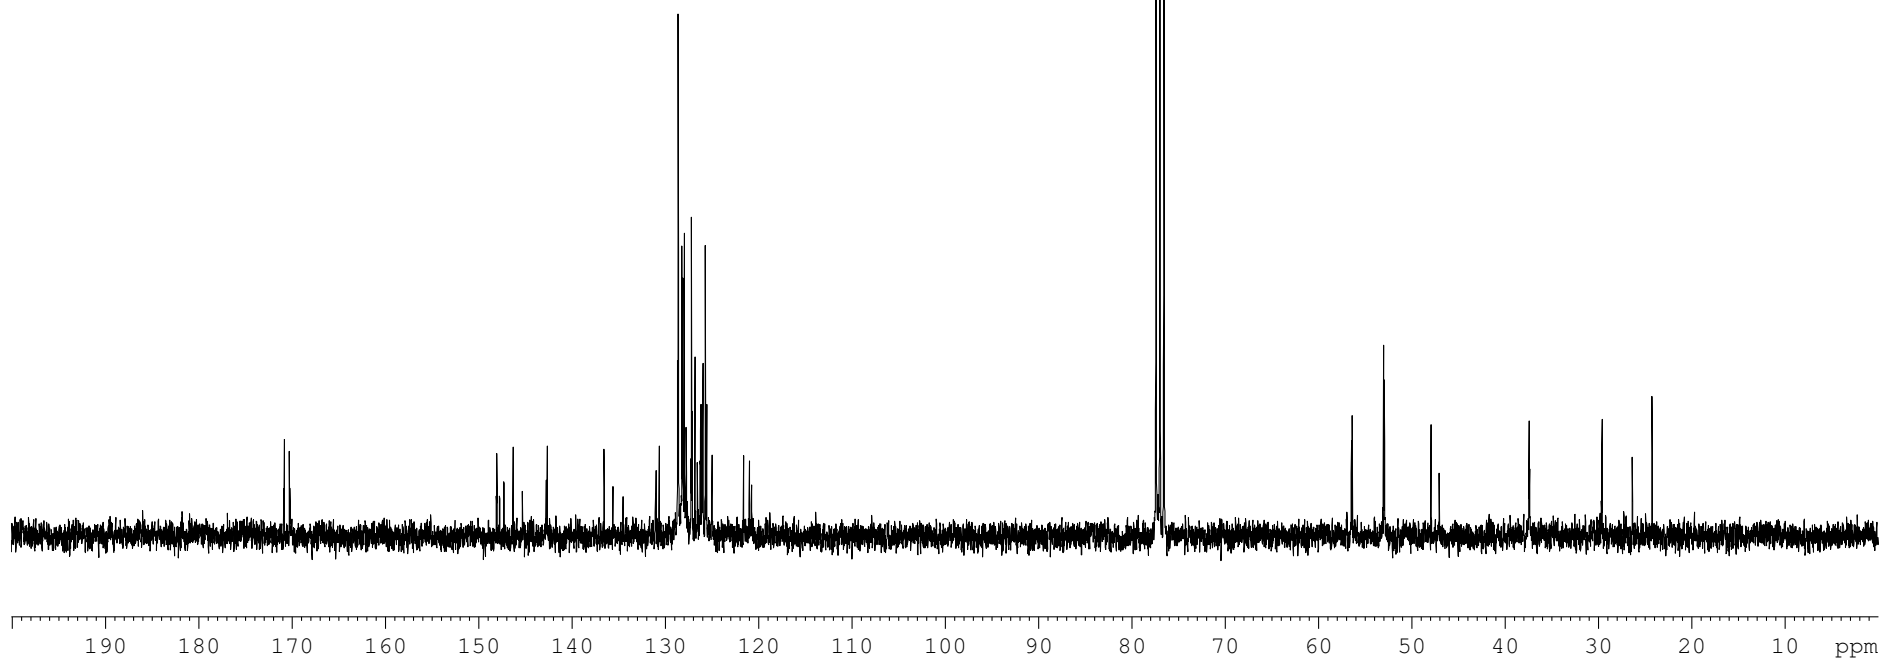



7.946  
7.919  
7.457  
7.431  
7.334  
7.309  
7.284  
7.245  
7.213  
7.186  
6.941  
6.914  
6.682  
6.655

5.862

5.458

3.780  
3.737  
3.712  
3.655  
3.342  
3.285  
3.066  
3.019  
2.972  
2.925

zwx-3-109

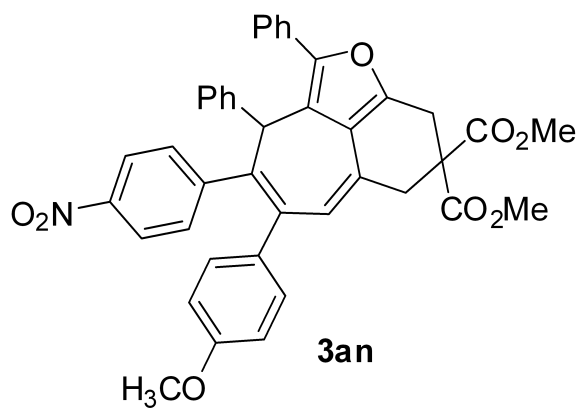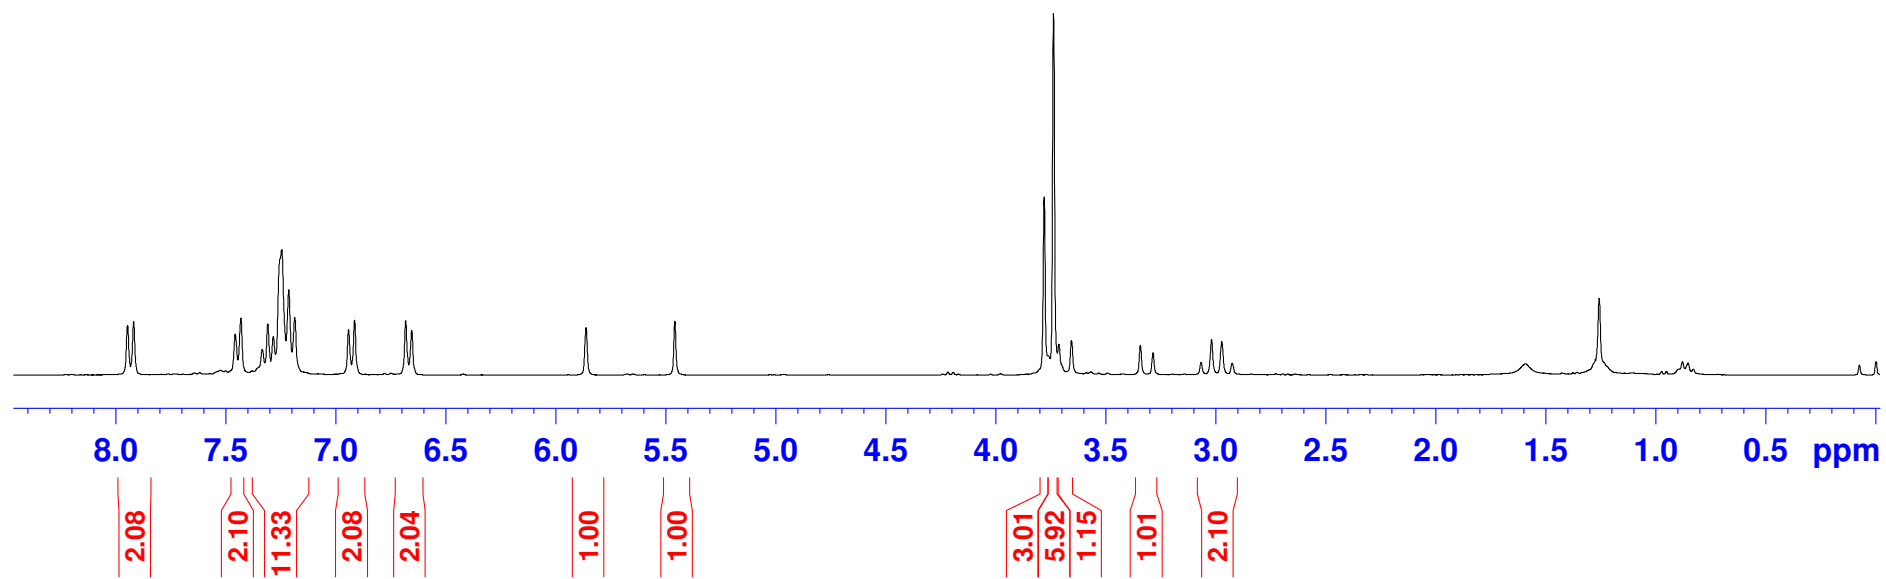

zwx-3-109

170.66  
170.18  
158.47  
152.67  
149.01  
148.18  
145.56  
141.66  
140.19  
136.18  
134.37  
131.17  
130.62  
128.83  
128.33  
127.60  
126.92  
126.64  
125.73  
125.40  
123.10  
120.73  
113.45

77.42  
77.00  
76.58

56.58  
55.13  
53.14  
53.08  
47.15

37.37

29.54

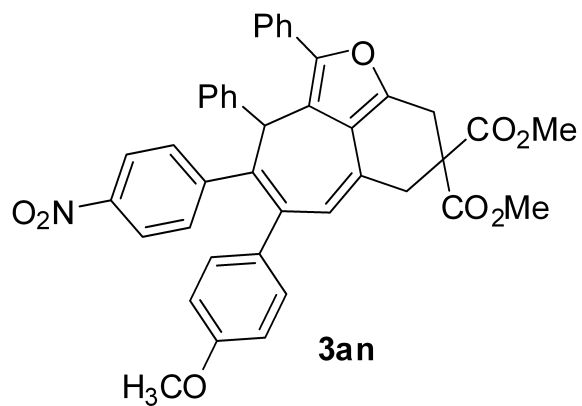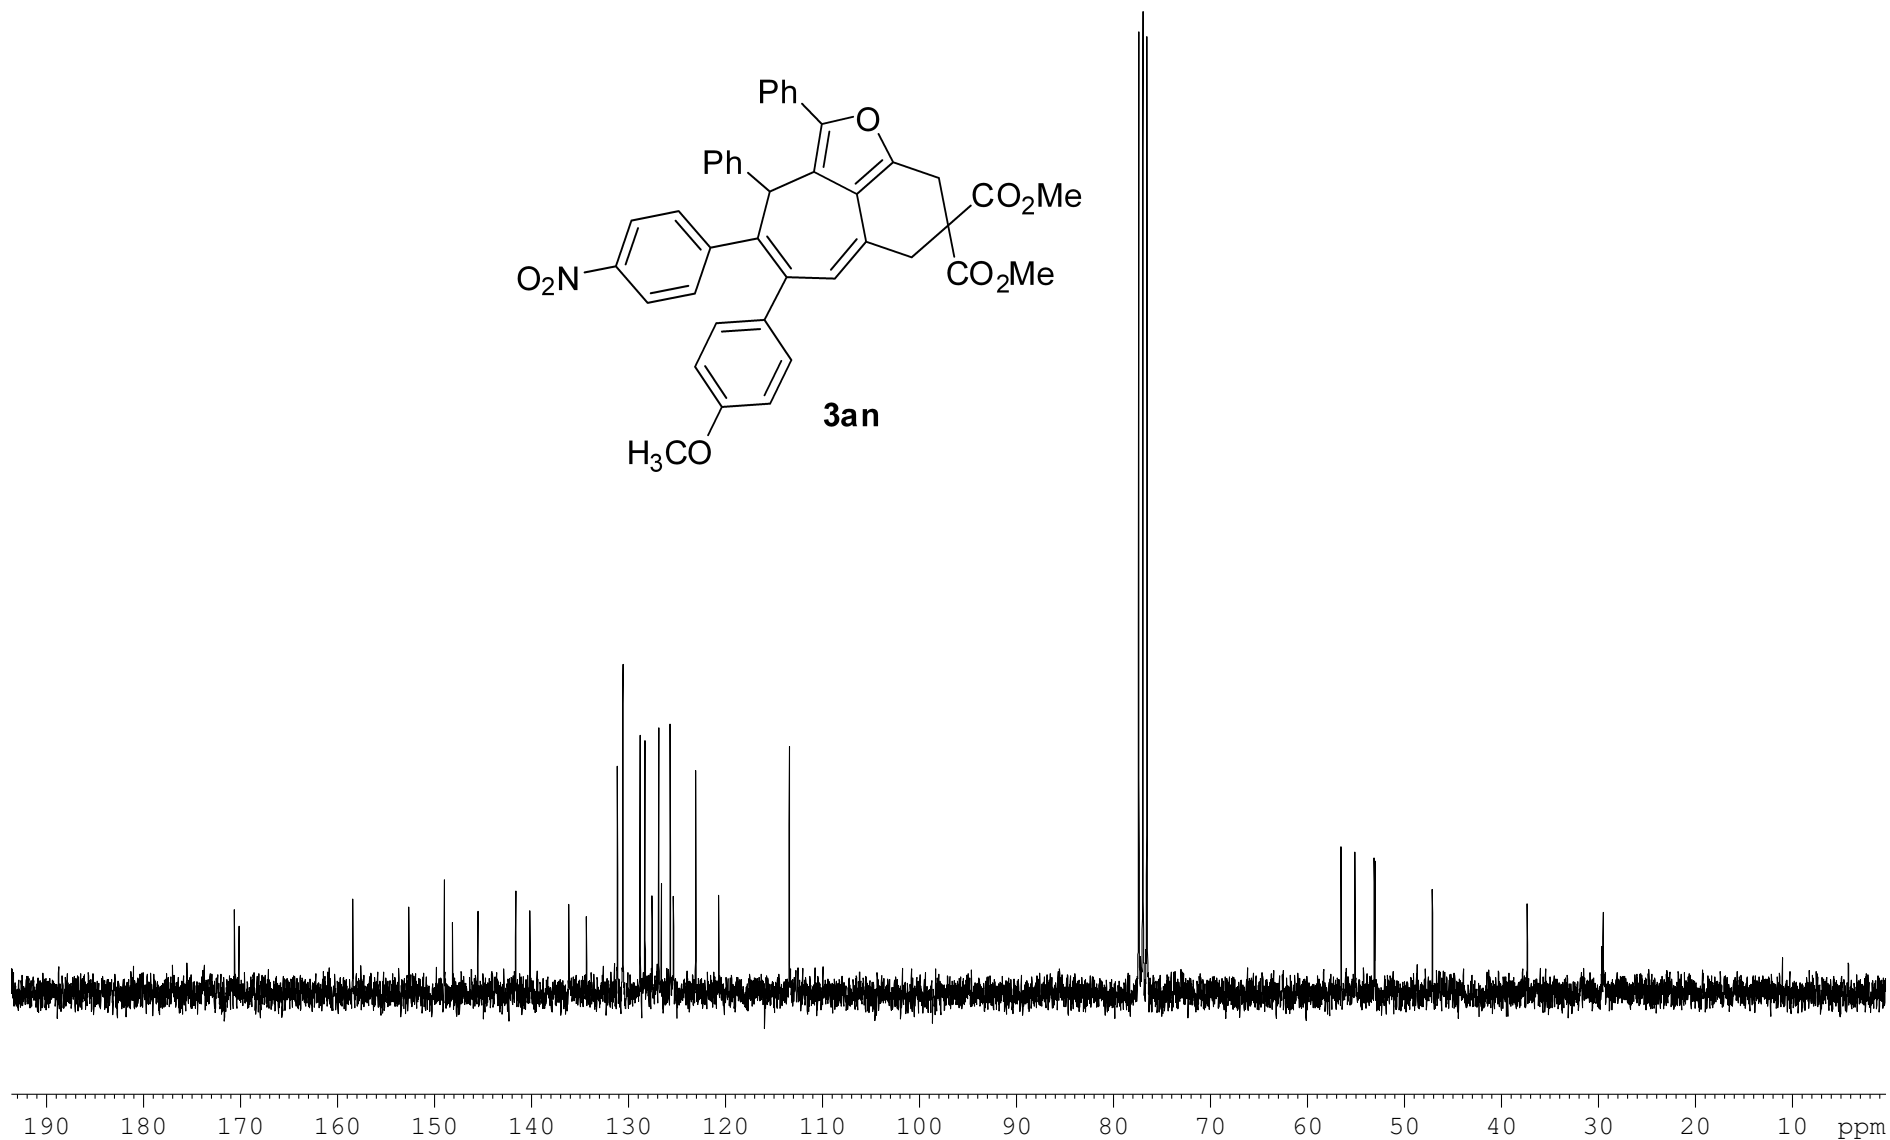

7.492  
7.473  
7.349  
7.330  
7.311  
7.270  
7.255  
7.230  
7.211  
7.186  
7.171  
6.802  
6.779

5.720  
5.699  
5.481  
5.021  
5.000

3.779  
3.746  
3.714  
3.697  
3.668  
3.243  
3.200  
3.161  
3.125  
3.019  
2.984

2.240  
2.066  
1.792

zwx-5-69

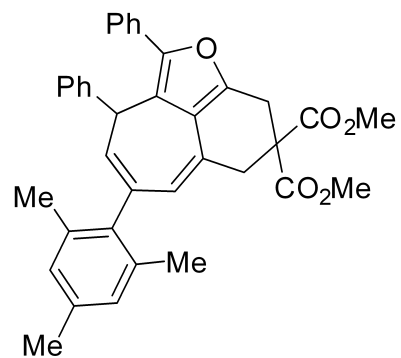

3ao

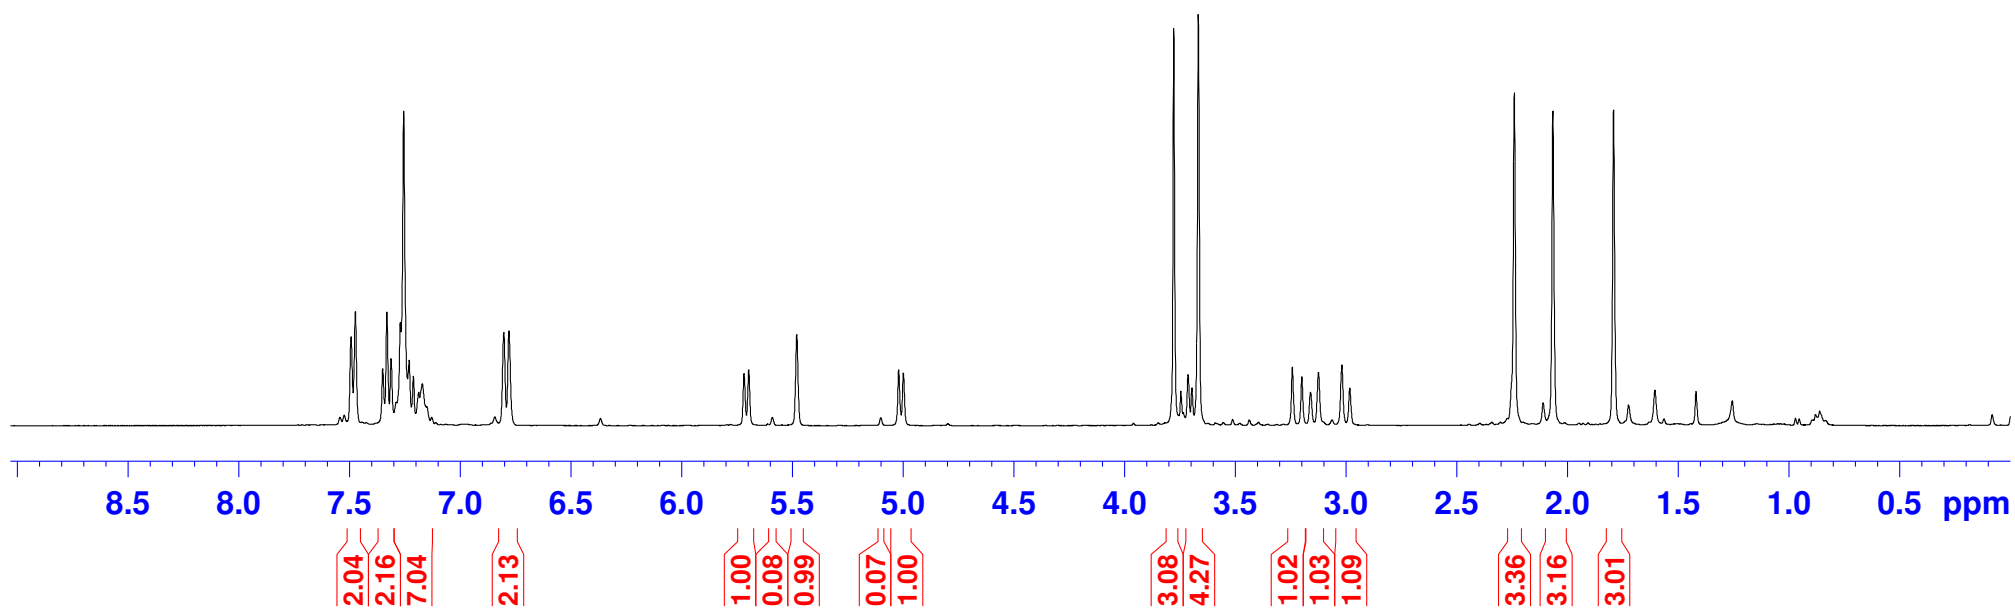

zwx-5-69

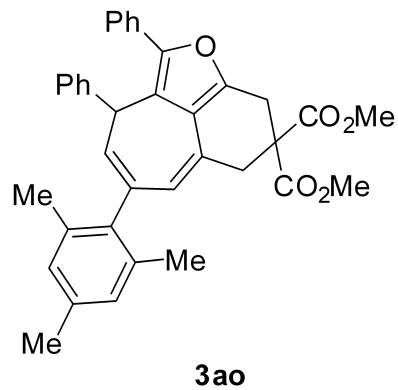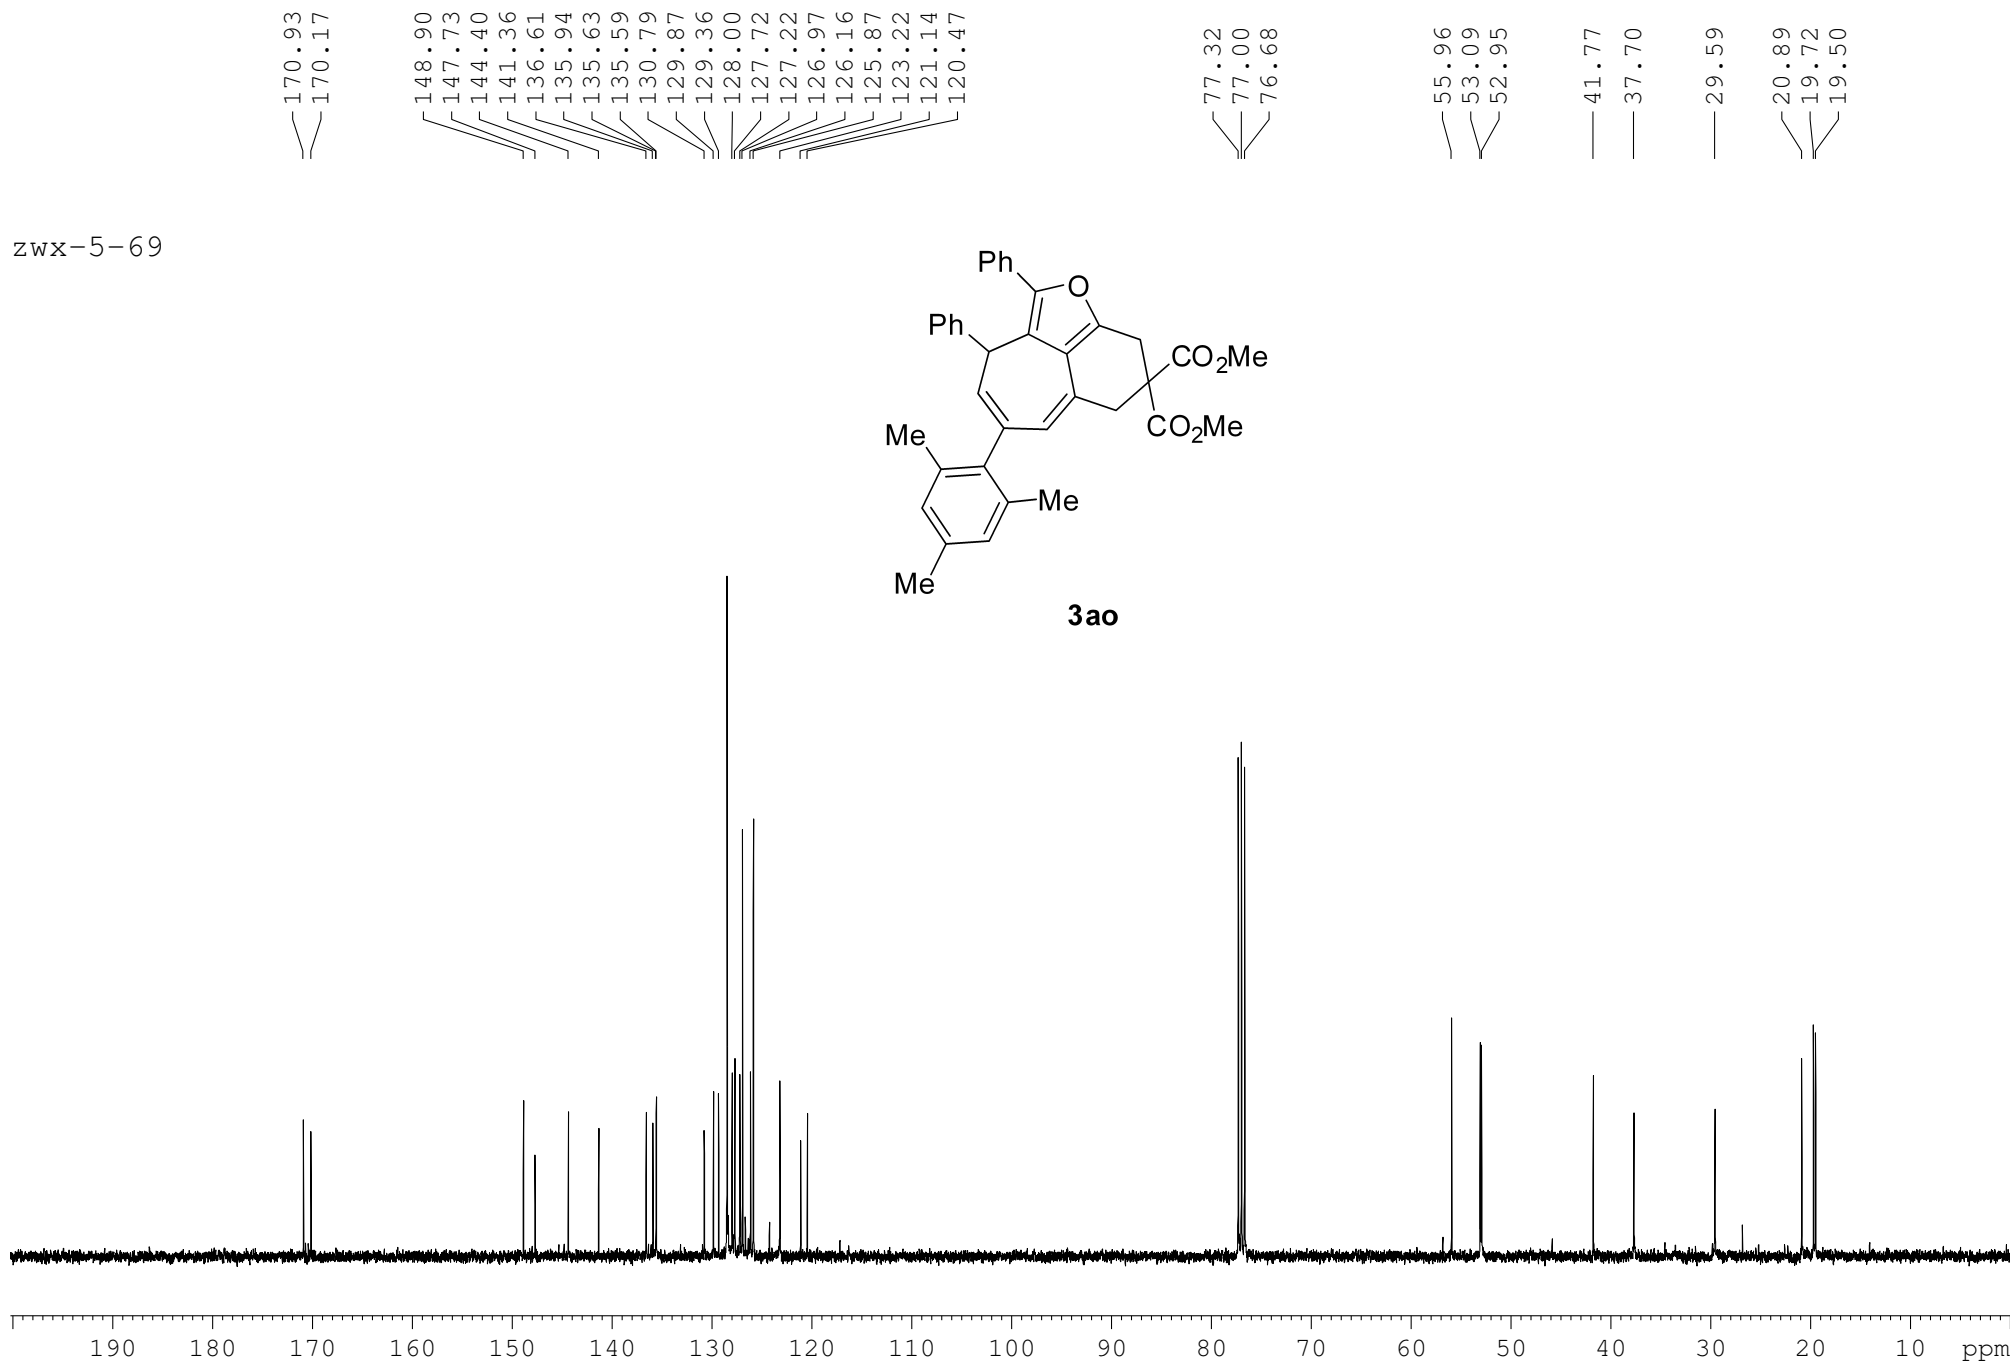

Supplement: c0cc02382e.pdf [file c0cc02382e.pdf]
